# Supplementary material for: Critical illness myopathy and trajectory of recovery in acute kidney injury requiring continuous renal replacement therapy: a prospective observational trial protocol
Source: PubMed Central journal article supplement — BMJ Open. 2023 May 22;13(5):e072448. doi: 10.1136/bmjopen-2023-072448 (PMC10230984; doi:10.1136/bmjopen-2023-072448), 2023-05-22
Supplement: bmjopen-2023-072448.draft_revisions.pdf [file bmjopen-2023-072448.draft_revisions.pdf]

# BMJ Open

BMJ Open is committed to open peer review. As part of this commitment we make the peer review history of every article we publish publicly available.

When an article is published we post the peer reviewers' comments and the authors' responses online. We also post the versions of the paper that were used during peer review. These are the versions that the peer review comments apply to.

The versions of the paper that follow are the versions that were submitted during the peer review process. They are not the versions of record or the final published versions. They should not be cited or distributed as the published version of this manuscript.

BMJ Open is an open access journal and the full, final, typeset and author-corrected version of record of the manuscript is available on our site with no access controls, subscription charges or pay-per-view fees (<http://bmjopen.bmj.com>).

If you have any questions on BMJ Open's open peer review process please email [info.bmjopen@bmj.com](mailto:info.bmjopen@bmj.com)

# BMJ Open

## Critical Illness Myopathy and Trajectory of Recovery in Acute Kidney Injury Requiring Continuous Renal Replacement Therapy: A Prospective Observational Trial Protocol

|                               |                                                                                                                                                                                                                                                                                                                                                                                                                                                                                                                                                                                                                                                                                                                                                                                                                                                                                                                                                                                                                                                                                                                                                                                                                                                                                                                                                                                                                                                          |
|-------------------------------|----------------------------------------------------------------------------------------------------------------------------------------------------------------------------------------------------------------------------------------------------------------------------------------------------------------------------------------------------------------------------------------------------------------------------------------------------------------------------------------------------------------------------------------------------------------------------------------------------------------------------------------------------------------------------------------------------------------------------------------------------------------------------------------------------------------------------------------------------------------------------------------------------------------------------------------------------------------------------------------------------------------------------------------------------------------------------------------------------------------------------------------------------------------------------------------------------------------------------------------------------------------------------------------------------------------------------------------------------------------------------------------------------------------------------------------------------------|
| Journal:                      | <i>BMJ Open</i>                                                                                                                                                                                                                                                                                                                                                                                                                                                                                                                                                                                                                                                                                                                                                                                                                                                                                                                                                                                                                                                                                                                                                                                                                                                                                                                                                                                                                                          |
| Manuscript ID                 | bmjopen-2023-072448                                                                                                                                                                                                                                                                                                                                                                                                                                                                                                                                                                                                                                                                                                                                                                                                                                                                                                                                                                                                                                                                                                                                                                                                                                                                                                                                                                                                                                      |
| Article Type:                 | Protocol                                                                                                                                                                                                                                                                                                                                                                                                                                                                                                                                                                                                                                                                                                                                                                                                                                                                                                                                                                                                                                                                                                                                                                                                                                                                                                                                                                                                                                                 |
| Date Submitted by the Author: | 03-Feb-2023                                                                                                                                                                                                                                                                                                                                                                                                                                                                                                                                                                                                                                                                                                                                                                                                                                                                                                                                                                                                                                                                                                                                                                                                                                                                                                                                                                                                                                              |
| Complete List of Authors:     | <p>Teixeira, J. Pedro; University of New Mexico School of Medicine, Divisions of Nephrology and Pulmonary, Critical Care, and Sleep Medicine</p> <p>Griffin, Benjamin R; University of Iowa Hospitals and Clinics, Division of Nephrology</p> <p>Pal, Chaitanya; University of New Mexico School of Medicine, Division of Nephrology</p> <p>González-Seguel, Felipe; Clinica Alemana de Santiago SA, Servicio Medicina Física y Rehabilitación; Universidad del Desarrollo, Facultad de Medicina Clínica Alemana Universidad del Desarrollo</p> <p>Jenkins, Nathaniel; The University of Iowa, Department of Health and Human Physiology</p> <p>Jones, Beth; University of New Mexico School of Medicine, Department of Orthopedics &amp; Rehabilitation</p> <p>Yoshida, Yuri; University of New Mexico School of Medicine, Department of Orthopedics &amp; Rehabilitation</p> <p>George, Naomi; University of New Mexico School of Medicine, Department of Emergency Medicine</p> <p>Israel, Hayley; University of New Mexico School of Medicine, Division of Pulmonary, Critical Care, and Sleep Medicine</p> <p>Ghazi, Lama; The University of Alabama at Birmingham School of Public Health, Department of Epidemiology</p> <p>Neyra, Javier; The University of Alabama at Birmingham Heersink School of Medicine, Division of Nephrology</p> <p>Mayer, Kirby; University of Kentucky College of Health Sciences, Department of Physical Therapy</p> |
| Keywords:                     | Acute renal failure < NEPHROLOGY, Adult intensive & critical care < INTENSIVE & CRITICAL CARE, Dialysis < NEPHROLOGY, Neuromuscular disease < NEUROLOGY, REHABILITATION MEDICINE, Rehabilitation medicine < INTERNAL MEDICINE                                                                                                                                                                                                                                                                                                                                                                                                                                                                                                                                                                                                                                                                                                                                                                                                                                                                                                                                                                                                                                                                                                                                                                                                                            |
|                               |                                                                                                                                                                                                                                                                                                                                                                                                                                                                                                                                                                                                                                                                                                                                                                                                                                                                                                                                                                                                                                                                                                                                                                                                                                                                                                                                                                                                                                                          |

SCHOLARONE™  
Manuscripts

1  
2  
3  
4  
5  
6  
7  
8  
9  
10  
11  
12  
13  
14  
15  
16  
17  
18  
19  
20  
21  
22  
23  
24  
25  
26  
27  
28  
29  
30  
31  
32  
33  
34  
35  
36  
37  
38  
39  
40  
41  
42  
43  
44  
45  
46  
47  
48  
49  
50  
51  
52  
53  
54  
55  
56  
57  
58  
59  
60

1  
2  
3 **Critical Illness Myopathy and Trajectory of Recovery in Acute Kidney Injury Requiring**  
4  
5 **Continuous Renal Replacement Therapy: A Prospective Observational Trial Protocol**  
6

7 J. Pedro Teixeira<sup>1,2,3\*</sup>, Benjamin R. Griffin<sup>4\*</sup>, C. Anil Pal<sup>1</sup>, Felipe Gonzalez-Seguel<sup>5</sup>, Nathaniel Jenkins<sup>6</sup>,  
8  
9 Beth M. Jones<sup>7</sup>, Yuri Yoshida<sup>7</sup>, Naomi George<sup>3,8</sup>, Hayley P. Israel<sup>2,3</sup>, Lama Ghazi<sup>9</sup>, Javier A. Neyra<sup>10</sup>,  
10  
11 Kirby P. Mayer<sup>11,12</sup>  
12

13 <sup>1</sup>Division of Nephrology, University of New Mexico School of Medicine, Albuquerque, NM

14 <sup>2</sup>Division of Pulmonary, Critical Care, and Sleep Medicine, University of New Mexico School of  
15 Medicine, Albuquerque, NM

16 <sup>3</sup>Center for Adult Critical Care, University of New Mexico Health Sciences Center, Albuquerque, NM

17 <sup>4</sup>Division of Nephrology, University of Iowa Hospitals and Clinics, Iowa City, IA

18 <sup>5</sup>Servicio de Medicina Física y Rehabilitación, Clínica Alemana Universidad del Desarrollo, Santiago,  
19 Chile

20 <sup>6</sup>Department of Health and Human Physiology, University of Iowa, Iowa City, IA

21 <sup>7</sup>Division of Physical Therapy, Department of Orthopedics & Rehabilitation, University of New Mexico  
22 School of Medicine, Albuquerque, NM

23 <sup>8</sup>Department of Emergency Medicine, University of New Mexico School of Medicine, Albuquerque, NM

24 <sup>9</sup>Department of Epidemiology, School of Public Health, University of Alabama at Birmingham,  
25 Birmingham, AL

26 <sup>10</sup>Division of Nephrology, Heersink School of Medicine, University of Alabama at Birmingham,  
27 Birmingham, AL

28 <sup>11</sup>Department of Physical Therapy, College of Health Sciences, University of Kentucky, Lexington, KY

29 <sup>12</sup>Center for Muscle Biology, University of Kentucky, Lexington, KY

30 \*JPT and BRG contributed equally to this work.  
31  
32

33  
34 **Corresponding author:**

35 J. Pedro Teixeira, MD

36 MSC10-5550, 1 University of New Mexico

37 Albuquerque, New Mexico 87131

38 [jteixeira@salud.unm.edu](mailto:jteixeira@salud.unm.edu)

39 505-272-4751  
40

41 **Word Count:** Abstract 300, Body 3997  
42

43 **Trial Registry:** ClinicalTrials.gov (NCT05287204)  
44

45 **Keywords:** acute kidney injury, critical illness myopathy, renal replacement therapy, CRRT, ICU-  
46 associated weakness  
47

48 **Protocol Date:** 1/7/2023  
49  
50  
51  
52  
53  
54  
55  
56  
57

## **Abstract**

**Introduction:** Acute kidney injury requiring renal replacement therapy (AKI-RRT) is common in the intensive care unit (ICU) and is associated with significant morbidity and mortality. Continuous RRT (CRRT) non-selectively removes large amounts of amino acids from plasma, lowering serum amino acid concentrations and potentially depleting total-body amino acid stores. Therefore, the morbidity and mortality associated with AKI-RRT may be partly mediated through accelerated skeletal muscle atrophy and resulting muscle weakness. However, the impact of AKI-RRT on skeletal muscle mass and function during and following critical illness remains unknown. We hypothesize that patients with AKI-RRT have higher degrees of acute muscle loss than patients without AKI-RRT and that AKI-RRT survivors are less likely to recover muscle mass and function when compared to other ICU survivors.

**Methods and Analysis:** This protocol describes a prospective, multicenter, observational trial assessing skeletal muscle size, quality, and function in ICU patients with AKI-RRT. We will perform musculoskeletal ultrasound to longitudinally evaluate rectus femoris size and quality at baseline (within 48 hours of CRRT initiation), day 3, day 7 or at ICU discharge, at hospital discharge, and 1-3 months post-discharge. Additional skeletal muscle and physical function tests will be performed at hospital discharge and post-discharge follow-up. We will analyze the effect of AKI-RRT by comparing the findings in enrolled subjects to historical controls of critically ill patients without AKI-RRT using multivariable modeling.

**Ethics and Dissemination:** We anticipate our study will reveal that AKI-RRT is associated with greater degrees of muscle loss and dysfunction along with impaired post-discharge recovery of physical function. These findings could impact the in-hospital and post-discharge treatment plan for these patients to include focused attention on muscle strength and function. We intend to disseminate findings to participants, healthcare professionals, the public, and other relevant groups via conference presentation and publication without any publication restrictions.

### **Strengths and limitations of this study**

- This study has several notable strengths including the study design based on multidisciplinary collaboration, the multicenter patient representation, the collection of longitudinal in-hospital and outpatient measures and outcomes, and the wide range of skeletal muscle and physical function tests being performed.
- Due to the pilot nature of this study, we will recruit critically ill patients with acute kidney injury (AKI) requiring continuous renal replacement therapy (CRRT) to collect a broad array of study measures and compare them with available datasets of recent historical controls of critically ill patients without AKI requiring RRT. While the use of these control groups enhances the feasibility of the project, it also represents a limitation.
- The high morbidity and mortality inherent to the study population may introduce competing risk of death and selection bias when assessing the outpatient outcomes.
- Differentiating the exact contributions of AKI, CRRT, and underlying acute illness may not be possible in this observational study due to several confounding variables that could be better addressed with an interventional trial design in the future. Nonetheless, our pilot study will generate critical data for the design and sample size estimations of such future trials.

## **Introduction**

**Background and Rationale:** Acute kidney injury (AKI) complicates approximately 20% of all hospital admissions and up to 50% of all intensive care unit (ICU) admissions.<sup>1,2</sup> Moreover, 13.5% of critically ill patients develop AKI requiring renal replacement therapy (AKI-RRT).<sup>1</sup> AKI is associated with poor short- and long-term prognoses. Even stage 1 AKI – defined by as little as a 0.3 mg/dL increase or 50% rise in serum creatinine above baseline<sup>3</sup> – is associated with up to a 10-fold increase in the odds of in-hospital mortality.<sup>4</sup> Similarly, AKI-RRT has an in-hospital mortality rate >50%, making it one of the deadliest conditions encountered in the hospital.<sup>5</sup> After discharge, AKI survivors are at increased risk of developing chronic kidney disease (CKD), end-stage kidney disease, cardiovascular disease, and death.<sup>6</sup> Other studies suggest that AKI predisposes to disparate sources of morbidity including infection<sup>7-10</sup>, bone fracture<sup>11</sup>, stroke<sup>12</sup>, GI hemorrhage<sup>13</sup>, and dementia.<sup>14</sup> While muscle wasting is well-described in patients with CKD<sup>15,16</sup>, the contribution of AKI-RRT to muscle wasting in critically ill patients has not been previously studied.

Acute skeletal muscle wasting occurs in up to 65% of patients admitted to the ICU.<sup>17</sup> Critical illness myopathy (CIM), defined as a deficit in muscle size and strength that develops as a result of an ICU admission, is associated with high rates of short- and long-term mortality and morbidity, including decreased quality of life (QoL) due to persistent functional mobility impairments and inability to perform simple activities of daily living.<sup>18-21</sup> AKI of any stage is known to alter tissue utilization of amino acids, making it plausible that AKI exacerbates CIM.<sup>15,22</sup> Studies have demonstrated that plasma amino acid levels are reduced and multiple non-essential amino acids become conditionally essential in the setting of AKI.<sup>23-25</sup> In addition, AKI leads to a state of increased amino acid oxidation but reduced amino acid transport into muscle.<sup>15</sup> RRT exacerbates this issue through non-selective removal of amino acids from plasma.<sup>15</sup> Amino acids are small and easily filtered during RRT, and, as a result, daily losses of amino acids in effluent can be immense at up to 18 grams daily with CRRT.<sup>26,27</sup>

The gold standards for assessing CIM are muscle biopsy or electrodiagnostic testing.<sup>28</sup> Furthermore, the measurement of psoas muscle area on a single cross-sectional computed tomography

1  
2  
3 (CT) image at the level of the L3 vertebra has been suggested as a standard clinical measure for skeletal  
4 muscle quantification.<sup>29</sup> However, biopsy, electrodiagnostic testing, and CT imaging present challenges  
5 which limit their clinical application. Musculoskeletal ultrasound (MSKUS), a relatively inexpensive,  
6 noninvasive alternative, has gained significant traction over the last decade for assessing muscle in ICU  
7 patients.<sup>30</sup> Studies have demonstrated that MSKUS has excellent inter-rater reliability and high clinical  
8 utility and have suggested that MSKUS has strong construct validity.<sup>31-35</sup> Recent data suggest that  
9 MSKUS can be reliably performed at the bedside in the ICU.<sup>36</sup>

10  
11  
12  
13  
14  
15  
16  
17  
18 The primary objective of this study is to characterize longitudinal measures of muscle size [rectus  
19 femoris (RF) muscle cross-sectional area (CSA) and muscle thickness (mT)] and quality [echo intensity  
20 (EI)] in critically ill adults with AKI requiring CRRT during their ICU stay and in post-discharge follow-  
21 up among survivors. This trial protocol was designed using the elements of the Strengthening the  
22 Reporting of Observational studies in Epidemiology (STROBE) checklist for cohort studies<sup>9</sup> whenever  
23 applicable.

### 32 Objectives:

33  
34  
35 Aim 1. To characterize changes in RF muscle mass and quality at baseline and days 3 and 7 following  
36 study enrollment in critically ill adults with AKI requiring CRRT and to compare these measurements  
37 with those of historical ICU controls without AKI-RRT.

38  
39  
40  
41 Hypothesis 1: RF muscle mass and muscle quality will be lower at 7 days in patients with AKI-  
42 RRT compared to the corresponding inpatient measurements of historical ICU controls without  
43 AKI-RRT.

44  
45  
46  
47 Aim 2. To characterize changes in RF muscle mass and quality at hospital discharge and within 3 months  
48 post-discharge in survivors of AKI requiring CRRT in the ICU and to compare these measurements with  
49 those of historical ICU controls without AKI-RRT.

50  
51  
52  
53 Hypothesis 2: The muscle mass and functional parameters of survivors of AKI-RRT obtained  
54 within 3 months of hospital discharge will be worse than the corresponding measurements from



1  
2  
3 historical controls of ICU survivors without AKI-RRT obtained within a similar post-discharge  
4  
5 timeframe.  
6

7 Aim 3. To examine if changes in plasma or effluent amino acid levels correlate with skeletal muscle loss  
8  
9 during CRRT or with skeletal muscle function at 1-3 months post discharge.  
10

11 Hypothesis 3: The concentrations of amino acids in blood and effluent during CRRT will  
12  
13 correlate with MSKUS parameters of muscle mass and will be associated with muscle function  
14  
15 following discharge.  
16  
17  
18  
19

### 20 **Methods: Participants, Interventions, and Outcomes**

21  
22 **Trial Design:** This is a prospective multicenter observational study to evaluate longitudinal inpatient and  
23  
24 outpatient measures of muscle mass and function in critically ill adults with AKI requiring CRRT and to  
25  
26 compare these measurements with those of historical ICU controls without AKI-RRT. The study will  
27  
28 have two phases, an ICU phase and a recovery phase for subjects who survive to discharge.  
29

30  
31 **Study Setting:** This study will be conducted at the adult ICUs at the academic medical centers of the  
32  
33 University of Kentucky, University of Iowa, and University of New Mexico. Following discharge,  
34  
35 survivors will return for outpatient evaluation of skeletal muscle and physical function.  
36

37  
38 **Eligibility Criteria:** To be included in the study, patients are required to be  $\geq 18$  years old and have AKI-  
39  
40 RRT with enrollment within 48 hours of CRRT initiation. Exclusion criteria include: (1) ICU admission  
41  
42 for  $>7$  days; (2) RRT of any kind at any time before ICU admission; (3) CKD with estimated glomerular  
43  
44 filtration rate  $<20$  mL/min/1.73 m<sup>2</sup> as calculated by the 2021 CKD-EPI equation<sup>37</sup>; (4) underlying muscle  
45  
46 disorders or muscle atrophy such as quadriplegia or hemiplegia, stroke with residual motor deficits, end-  
47  
48 stage liver disease, active alcohol use disorder, active malignancy (other than non-melanoma skin cancer)  
49  
50 within 1 year, burns, or other baseline neuromuscular disease; (5) pregnancy; (6) concomitant use of other  
51  
52 extracorporeal support devices such as ventricular assisted devices or extracorporeal membrane  
53  
54 oxygenation; or (7) anticipated inability to engage in weight-bearing testing after discharge (e.g., trauma  
55  
56  
57  
58  
59  
60

1  
2  
3 or orthopedic surgery). For outpatient testing, patients will be ineligible if they remain on RRT in the  
4  
5 week prior to the research appointment.  
6

7 **Control Population:** Given the pilot nature of this study, we will use recent historical controls defined as  
8  
9 critically ill adults without AKI-RRT in whom similar measurements of muscle size, quality, and function  
10  
11 were collected. Specifically, we have previously collected data on 41 ICU patients, of which 36 did not  
12  
13 have AKI-RRT and will serve as the control group for the ICU phase of this study, and have published  
14  
15 the results of MSKUS performed in the ICU and functional assessments performed at both ICU discharge  
16  
17 and hospital discharge.<sup>38</sup> The controls for the recovery phase will come from an ongoing prospective  
18  
19 observational study being performed at the University of Kentucky, which will include outpatient  
20  
21 functional assessments performed on 200 ICU survivors (NCT05537298). See **Table 1** for a summary of  
22  
23 the demographic and clinical characteristics of the control cohorts which have been published thus far.<sup>21 38</sup>  
24  
25

26  
27  
28  
29  
30  
31  
32  
33  
34  
35  
36  
37  
38  
39  
40  
41  
42  
43  
44  
45  
46  
47  
48  
49  
50  
51  
52  
53  
54  
55  
56  
57  
58  
59  
60

39  
**Primary Outcome (ICU phase):** The primary outcome is the change in RF CSA, mT, and EI measured  
by MSKUS at baseline, assessed within 48 hours of CRRT initiation, to ICU days 3 and 7 of study  
enrollment (or at ICU discharge, if sooner). Operational and standardization procedures have been  
previously published.<sup>35 38</sup> In brief, patients are positioned supine with the lower extremity in neutral  
alignment. RF ultrasound images are acquired two-thirds of the distance from the anterior superior iliac  
spine to the superior border of the patella of the right lower extremity at all timepoints. Sonographers will  
use a linear probe (5-15 Hz) with the same machine for all timepoints and a minimal-to-no-compression  
technique. Sonographers will obtain three images per assessment to reduce variations in EI. Ultrasound  
images will be assessed for CSA, mT, and EI at baseline within 48 hours of CRRT initiation, at days 3  
and 7 from enrollment (or at ICU discharge, if sooner). A representative ultrasound image and the  
techniques for landmarking and probe pressure are provided in **Figure 1**.

**Secondary Outcomes (ICU Phase):** Patients will have blood collected at baseline (within 48 hours of  
CRRT initiation), at study days 3 and 7 (or ICU discharge, if sooner). Creatinine and cystatin C will be  
measured at each timepoint. Additionally, 5-mL blood samples and CRRT effluent samples at each

7

**Table 1.** Demographic and clinical characteristics of the cohorts being used as our historical controls for this study.

| Cohort Characteristic                                 | Control cohort for ICU phase <sup>*38</sup>                          | Control cohort #1 for recovery phase <sup>†21</sup>                                  | Control cohort #2 for recovery phase <sup>39</sup>   |
|-------------------------------------------------------|----------------------------------------------------------------------|--------------------------------------------------------------------------------------|------------------------------------------------------|
| ICU or admission type                                 | Medical 73%; cardiothoracic 27%                                      | Medical 100%                                                                         | Mixed                                                |
| Years of enrollment                                   | 2018 to 2019                                                         | 2018 to 2019                                                                         | 2018 to 2021                                         |
| N                                                     | 41*                                                                  | 12 <sup>†</sup>                                                                      | 59                                                   |
| Primary inclusion                                     | Acute respiratory failure or sepsis and anticipated ICU stay >3 days | Survivors of acute respiratory failure requiring >48 hours of mechanical ventilation | Survivors of sepsis and/or acute respiratory failure |
| Timing of initial assessment                          | Within 48 hours of admission; median 1.1 days [IQR 0.7-1.4]          | N/A                                                                                  | N/A                                                  |
| Timing of outpatient assessment                       | N/A                                                                  | 4-8 weeks after hospital discharge                                                   | 3 months after hospital discharge                    |
| Age, median years [IQR]                               | 61 [55-68]                                                           | 58 [45.5-65]                                                                         | 56 [48-64]                                           |
| Female, no. (%)                                       | 18 (44%)                                                             | 4 (33%)                                                                              | 31 (53%)                                             |
| No. (%) mechanically ventilated                       | 30 (73%)                                                             | 12 (100%)                                                                            | 43 (73%)                                             |
| Duration of mechanical ventilation, median days [IQR] | 3.4 [1-7.7]                                                          | 6.45 [2.8-11.95]                                                                     | 8 [5-14]                                             |
| No. (%) requiring RRT                                 | 5 (12%)*                                                             | NR <sup>†</sup>                                                                      | 0                                                    |
| Disease severity (SOFA) scores                        | Mean 8.1 [SD ±4.8]                                                   | Median 8 [IQR 4.5-10.25]                                                             | Median 10 [IQR 8-12]                                 |
| ICU LOS, median days [IQR]                            | 8 [4]                                                                | 7.4 [4.3-18.6]                                                                       | 10 [6-15]                                            |
| Hospital LOS, median days [IQR]                       | 11.2 [8-19]                                                          | 16.7 [9.4-28.7]                                                                      | 15 [11-22]                                           |
| Hospital mortality                                    | 12%                                                                  | N/A                                                                                  | N/A                                                  |

Presented here are only previously published data. The two control cohorts for the recovery phase represented in the table are only a subset of the 200 patients in our ongoing registry that will serve as the control for the recovery phase. \*Data for this entire cohort are presented as published, including data from the 5 patients treated with RRT who will be excluded from the control group in our analysis. <sup>†</sup>Though not reported in the published manuscript, RRT status is available for this cohort and any patients with AKI-RRT will be excluded from the control group in our analysis. Abbreviations: ICU, intensive care unit; IQR, interquartile range; LOS, length of stay; N/A, not applicable; NR, not reported; RRT, renal replacement therapy; SD, standard deviation; SOFA, Sequential Organ Failure Assessment.

1  
2  
3 timepoint will be sent for gas chromatography-mass spectrometry evaluating a panel of analytes including  
4 amino acids, carbohydrates, and fatty acids. Remaining samples will be stored for future analysis, though  
5 no genetic analysis will be conducted now or in the future.  
6  
7

8  
9 Patients will be scored at the same timepoints as above using the ICU Mobility Scale, an 11-point  
10 scale ranging from 0-10 which involves the clinician scoring the patient's maximum level of mobility in  
11 the prior 24-hour period.<sup>40 41</sup>  
12  
13

14  
15  
16  
17  
18 **Outcomes (Recovery Phase):** Survivors will participate in skeletal muscle and physical function testing  
19 at hospital discharge and during the outpatient visit at 1-3 months post-discharge. Measurements will  
20 include MSKUS to determine RF CSA, mT, and EI. We will also conduct an array of standardized and  
21 validated tests including:  
22  
23

- 24  
25  
26 • **Medical Research Council Sum-score (MRC-ss):** MRC-ss is a measure of global peripheral  
27 muscle strength that is the current clinical standard for diagnosing ICU-acquired weakness (ICU-  
28 AW).<sup>42</sup> Muscle strength is assessed by physical exam and rated on an ordinal scale (0-5) at six  
29 bilateral muscle groups: shoulder abductors, elbow flexors, wrist extensors, hip flexors, knee  
30 extensors, and ankle dorsiflexors. A score <48 is considered indicative of ICU-AW, with a score  
31 <36 indicative of severe weakness with the inability to act against resistance.<sup>43</sup>  
32  
33
- 34 • **Muscle strength using hand-held dynamometry for knee extension:** Maximal isometric knee  
35 extensor strength will be measured as peak force production and rate of force development  
36 following previously published standardized positions (**Figure 2**).<sup>44</sup>  
37  
38
- 39 • **Muscle strength using hand-grip dynamometry:** Hand-grip dynamometers will be utilized to  
40 measure maximum isometric strength of the hand and forearm muscles at previously published  
41 standardized positions.<sup>42 43</sup> The patient will undergo three repetitions with both the right and left  
42 hand, alternating between hands.  
43  
44  
45  
46  
47  
48  
49  
50  
51  
52  
53  
54  
55  
56  
57  
58  
59  
60

- 1  
2  
3  
4  
5  
6  
7  
8  
9  
10  
11  
12  
13  
14  
15  
16  
17  
18  
19  
20  
21  
22  
23  
24  
25  
26  
27  
28  
29  
30  
31  
32  
33  
34  
35  
36  
37  
38  
39  
40  
41  
42  
43  
44  
45  
46  
47  
48  
49  
50  
51  
52  
53  
54  
55  
56  
57  
58  
59  
60
- **Short Physical Performance Battery (SPPB):** Physical function and physical frailty will be measured using the SPPB, a performance-based composite test with a total of 12 points including components of balance (side-by-side stand, semi-tandem stand, and full-tandem stand), chair-to-stand test, and 4-meter habitual gait speed.<sup>45 46</sup>
  - **Timed Up and Go (TUG) Test:** The TUG assesses the time (in seconds) for a subject to stand on command from a seated position, walk 3 meters, turn around, walk back to the chair, and sit down. The purpose of TUG is to assess mobility, physical function, and fall risk. TUG has been validated in and recommended for patients with critical illness.<sup>47-49</sup>
  - **Six-minute walk test (6-MWT):** The 6-MWT assesses the distance a subject can walk in six minutes, providing a global representation of physical function and cardiopulmonary endurance.<sup>50</sup>  
<sup>51</sup> Meta-analysis provides benchmark data for survivors of critical illness.<sup>52</sup>
  - **Quality of Life testing using EuroQol Group 5-dimension 5-level (EQ-5D-5L) questionnaire:** The EQ-5D is a standardized measure of health status developed by the Euro-Qol Group to provide an assessment of health for clinical and economic appraisal.<sup>53</sup> It consists of two sections: the descriptive system and the visual analogue scale (EQ VAS). The descriptive system assesses five dimensions: mobility, self-care, usual activities, pain/discomfort, and anxiety/depression. The EQ VAS records the respondent's self-rated health on a 20-cm vertical visual analogue scale with endpoints labeled the "best health you can imagine" and the "worse health you can imagine." This information can be used as a quantitative measure of health as judged by individual respondents.<sup>51 54 55</sup>
  - **Clinical Frailty Scale (CFS):** The CFS is designed for clinical use and has been widely adopted as a judgement-based tool to screen for frailty and to broadly stratify degrees of fitness and frailty.<sup>56 57</sup> It is not a questionnaire, but a way to summarize information from a clinical encounter to roughly quantify an individual's overall health status. While CFS has traditionally been used

specifically in older patients, recent data have demonstrated its utility in an ICU population demographically similar to our target population.<sup>58</sup>

- **Functional Assessment of Chronic Illness Therapy Fatigue (FACIT-F) Questionnaire:** The FACIT-F scale is a 13-item measure that assesses self-reported fatigue and its impact upon daily activities and function.<sup>59 60</sup>
- **36-Item Short Form Health Survey Physical Function Scale (SF-36 Physical Function):** The SF-36 is a 36-item patient-reported survey of health commonly used to evaluate adult patients which contains 8 domains, including a physical function scale based on 10 of the 36 items which has been shown to have high reliability.<sup>61</sup>
- **Additional Events:** Finally, we will document the occurrence of the following events: return to driving, return to work or hobby, hospital readmission, and need for emergency department care.

**Assessor Training:** This multisite study is an interdisciplinary collaboration with expertise in critical care, nephrology, muscle biology, and physical function. Physical therapist-scientists and exercise physiologists with established expertise in MSKUS and functional testing serve as coinvestigators at each site. Three two-hour sessions of teleconference training will be performed to promote standardization of ultrasound and outcome assessments. In addition, novice sonographers were instructed to perform and practice a minimum of 10 acquisitions of RF muscle images from healthy individuals before study initiation. To better establish inter-rater reliability of image acquisition, the first 5 patients at each site will have ultrasound studies conducted by two team members. The first sonographer will obtain images and leave the room, and the second will enter and repeat the test. After a 10-minute wash-out period, the team members will sequentially repeat the ultrasound measurements, which will allow us to establish both inter- and intra-observer variability. Finally, images will be blinded, coded (rater 1 or rater 2; site location) and sent securely to the University of Kentucky to be reviewed by an expert sonographer (KPM, who has > 6 years of MSKUS experience) to ensure cross-site standardization of measurements.<sup>35</sup> All images will be analyzed for muscle CSA, mT, and EI by the same blinded expert sonographer. The images from the first 5 patients obtained by the two sonographers at each site will be examined with intra-

class correlation coefficient (ICC). Sites with ICC <0.7 will receive additional training to improve reliability at each site. ICC values will be disseminated with our final results.

**Participant Timeline:** Patients enrolled in the study will participate in up to two phases, an ICU phase and – for those who survive their critical illness – a recovery phase. The schedule of assessments for both phases is delineated in **Table 2**.

**Table 2.** Planned evaluations at each study timepoint.

| Parameter                | Timepoint                     |                            |                                |                    |                       |
|--------------------------|-------------------------------|----------------------------|--------------------------------|--------------------|-----------------------|
|                          | ICU Phase                     |                            |                                | Recovery Phase     |                       |
|                          | Within 48 hours of CRRT start | 3 ± 1 days from enrollment | Study day 7 (or ICU discharge) | Hospital Discharge | Outpatient 1-3 months |
| Rectus Femoris US        | X                             | X                          | X                              | X                  | X                     |
| Amino Acids (Blood)      | X                             | X                          | X                              |                    |                       |
| Amino Acids (Effluent)   | X                             | X                          | X                              |                    |                       |
| Cystatin C               | X                             | X                          | X                              |                    |                       |
| ICU Mobility Scale       | X                             | X                          | X                              |                    |                       |
| Muscle Strength - MRC-ss |                               |                            |                                | X                  | X                     |
| Muscle Strength - HGD    |                               |                            |                                | X                  | X                     |
| Muscle Strength - HHD    |                               |                            |                                | X                  | X                     |
| SPPB                     |                               |                            |                                | X                  | X                     |
| TUG test                 |                               |                            |                                |                    | X                     |
| 6-MWT                    |                               |                            |                                |                    | X                     |
| EQ-5D-5L                 |                               |                            |                                |                    | X                     |
| Clinical Frailty Scale   |                               |                            |                                |                    | X                     |
| FACIT-fatigue            |                               |                            |                                |                    | X                     |
| SF-36 Physical Function  |                               |                            |                                |                    | X                     |
| Return to driving        |                               |                            |                                |                    | X                     |
| Return to work or hobby  |                               |                            |                                |                    | X                     |
| Readmission              |                               |                            |                                |                    | X                     |
| ED visit                 |                               |                            |                                |                    | X                     |

Abbreviations: 6-MWT, six-minute walk test; ED, emergency department; EQ-5D-5L, EuroQol Group 5-dimension 5-level version; FACIT-F, Functional Assessment of Chronic Illness Therapy-Fatigue; HGD, hand-grip dynamometry; HHD, hand-held dynamometry; ICU, intensive care unit; MRC-ss, Medical Research Council sum-score; SF-36, 36-Item Short Form Health Survey; SPPB, Short Physical Performance Battery; TUG, Timed Up and Go; US, ultrasound.

1  
2  
3 **Sample Size:** Our previous study reported a decrease in muscle RF CSA at ICU day 7 of 18.5%.<sup>38</sup> To  
4 detect an absolute difference in percent decrease in muscle size of 6% at 7 days (24.5% change at 7 days  
5 in AKI-RRT group vs. 18.5% change in controls), 61 patients per group are needed assuming an alpha of  
6 0.05 and a power of 80%. This will require inclusion of 20 AKI-RRT patients per site that provide all  
7 ICU datapoints. Our previous study also reported that RF CSA was  $2.47 \pm 0.88$  cm<sup>2</sup> at ICU day 7, down  
8 from a baseline on ICU day 1 of 2.99 cm<sup>2</sup>.<sup>38</sup> To detect a full return to baseline in the outpatient setting  
9 with an alpha of 0.05 and a power of 80%, 22 patients are required in each group. To detect a 75%  
10 recovery to baseline from day 7 values, 40 patients are required. We anticipate a 40-50% in-hospital  
11 mortality rate which would leave 31 to 37 patients alive at discharge. Assuming 22 patients are needed,  
12 this provides room for attrition or loss to follow-up of 30-40%.

13  
14 **Recruitment:** Patients will be recruited in the multidisciplinary adult ICUs of the three sites involved in  
15 the study. Patients will be identified through communication with the nephrology consult services at each  
16 site, who will independently make decisions regarding indications for and timing of initiation of RRT.  
17 The enrollment will occur for a full year following institutional review board (IRB) approval at each site,  
18 with the funding dates ranging from August 1, 2022, to July 31, 2023, at the University of Kentucky and  
19 University of Iowa and from October 1, 2022, to September 30, 2023, at the University of New Mexico.

20  
21 **Patient and Public Involvement:** No formal patient advisory committee was established and there was  
22 no patient or public involvement in the design or planning of the study. However, to inform future study  
23 design, we will conduct a brief open-ended post-study survey following the outpatient visit at 1-3 months  
24 to help discern which of the patient-reported outcome measures and functional assessments performed  
25 appear most valuable to the study subjects (**Supplementary material 1**).

### 26 **Methods: Data collection, management, and analysis**

27  
28 **Data Collection Methods:** Ultrasound images will be transferred through secure link to the data  
29 coordinating site (University of Kentucky). One expert sonographer with clinical and research experience  
30 (KPM) will analyze the images for CSA, mT, and EI. All muscle analyses will be performed blinded with  
31



1  
2  
3 all images coded by a different research coordinator. The blinded assessor will be unaware of the patient  
4 identification, the investigator obtaining the images, or the timepoint of the MSKUS. Blood and effluent  
5 fluid will be collected at the defined timepoints. Plasma samples will be collected in EDTA tubes,  
6 centrifuged at 1,000 g for 10 minutes at 4 °C. Following extraction of supernatant and transfer into  
7 storage tubes, samples will be stored at -80 °C. The specimens will be shipped to the biospecimen site  
8 (University of Iowa) where we will perform the metabolomic analysis on all samples in one batch. Patient  
9 data including demographics, data related to acute illness and comorbidity, and test results will be  
10 recorded using standardized case report forms and then uploaded to REDCap.  
11  
12

13  
14  
15  
16 **Data Management:** Data will be stored using REDCap software at each site. REDCap is a secure web  
17 application for building and managing online databases.<sup>62</sup> REDCap is HIPAA compliant and is  
18 specifically geared to support online and offline data capture for research studies and operations.  
19

20  
21  
22  
23  
24  
25  
26 **Statistical Methods:** We will summarize descriptive statistics at each timepoint using frequencies and  
27 proportions for categorical variables and means and standard deviations or medians and interquartile  
28 ranges, as appropriate, for continuous variables. Binary outcome variables include the diagnosis of ICU-  
29 acquired weakness (defined as MRC-ss <48/60) and the additional recovery phase events (i.e., return to  
30 driving, return to work or hobby, hospital readmission, and need for emergency department care).  
31 Continuous variables include MSKUS parameters, strength testing, and physical function testing. Ordinal  
32 variables include scores on the EQ-5D-5L, FACIT-F sub-question, and CFS.  
33  
34  
35  
36  
37  
38  
39  
40

- 41 • **ICU Phase:** The primary outcome in the ICU phase of the study, corresponding to Aim 1, will be  
42 the change in RF CSA, mT, and EI from baseline to day 7 (or ICU discharge) within AKI-RRT  
43 patients and in comparison to historical ICU controls without AKI-RRT. Repeated measures  
44 analysis will be used with muscle parameters as fixed effects. Of note, in the cohort to be used as  
45 the historical control for the ICU phase, MSKUS was performed on ICU days 1, 3, 5, and 7 and  
46 muscle strength assessment (by MRC-ss, hand-held dynamometry, and hand-grip dynamometry)  
47 was performed at ICU and hospital discharge.<sup>38</sup> For AKI-RRT patients, time 0 is study enrollment  
48 (which must be within 48 hours of CRRT initiation). To account for the resulting differences in  
49  
50  
51  
52  
53  
54  
55  
56  
57

1  
2  
3 timing of assessments, time from ICU admission to MSKUS and muscle strength assessments  
4  
5 will be included as covariables in our analyses. We will develop multivariable models for within-  
6  
7 group comparisons (in AKI-RRT cases) and between-group comparisons (AKI-RRT cases vs.  
8  
9 controls). Additional variables entered in the analyses will include demographic variables  
10  
11 including age and sex, Charlson comorbidity score, illness severity as measured by sequential  
12  
13 organ failure assessment (SOFA) score<sup>63</sup>, and ICU variables (including mechanical ventilation,  
14  
15 trauma, sepsis, corticosteroid use, use of paralytic agents, and ICU type). We will conduct  
16  
17 univariable analysis to determine if any of these variables are significantly associated with the  
18  
19 primary outcomes. To avoid overfitting, only significant variables will be added in the subsequent  
20  
21 adjusted model. We will use paired t-test to examine within-group differences and Analysis of  
22  
23 Variance (ANOVA) for between-group differences of MSKUS parameters and other continuous  
24  
25 measures. Binary outcomes will be compared by chi-square test. Bonferroni adjustment will be  
26  
27 utilized for multiple comparisons.  
28  
29

- 30 • **Recovery Phase:** The primary outcomes in the recovery phase of the study, corresponding to  
31  
32 Aim 2, will include both (1) the detailed characterization of longitudinal changes in muscle mass  
33  
34 and quality and functional status in AKI-RRT survivors, including comparison of post-discharge  
35  
36 recovery of RF size and quality assessed by MSKUS and of muscle strength in AKI-RRT  
37  
38 survivors as measured within 1-3 months of discharge compared to in-hospital baselines, and (2)  
39  
40 comparison of MSKUS parameters and of muscle strength assessed at 1-3 months after discharge  
41  
42 in AKI-RRT survivors with the same parameters in historical controls of ICU survivors without  
43  
44 AKI-RRT. The assessments of muscle strength at this phase will include MRC-ss, hand-held  
45  
46 dynamometry for knee extension, and hand-grip dynamometry. Using the same methods and  
47  
48 covariables as outlined for the ICU phase analysis, we will generate multivariable models for  
49  
50 within-group and between-group comparisons of MSKUS parameters and muscle strength, with  
51  
52 the exception that lengths of ICU and hospital stay and time from hospital discharge to outpatient  
53  
54 assessment will be included as covariables in this phase. For the SPPB, TUG, 6-MWT, EQ-5D-  
55  
56  
57

1  
2  
3 5L, CFS, FACIT-F, SF-36, and additional recovery phase events, differences between the AKI-  
4 RRT survivors and the historical ICU survivor controls without AKI-RRT will be compared  
5 using t-test, Wilcoxon rank sum test, Mann-Whitney U test, and chi-square test, as appropriate.  
6  
7

- 8  
9 • **Metabolomic analysis:** The metabolomic analysis will have no control group. The primary  
10 outcome of the metabolomic analysis, corresponding to Aim 3, will be the correlation between  
11 changes in plasma and effluent amino acid levels measured during CRRT treatment in the ICU  
12 phase and both the MSKUS parameters obtained throughout the study and muscle strength  
13 measured in AKI-RRT survivors at hospital discharge and 1-3 months post-discharge. The  
14 primary analysis will be performed using a mixed effects model with ANOVA using Sidak's  
15 multiple comparison test for paired samples to compare baseline to subsequent samples.  
16 Correlations with muscle changes based on MSKUS measurements at days 3 and 7 and  
17 correlations with muscle mass, strength, and function at hospital discharge and at 1-3 months will  
18 be assessed with Pearson correlation test for continuous variables and Spearman Rho test for non-  
19 parametric data.  
20  
21  
22  
23  
24  
25  
26  
27  
28  
29  
30  
31

### 32 33 34 **Ethics and Dissemination**

35  
36  
37 **Research Ethics Approval:** This protocol (IRB #71153) was approved by the University of Kentucky  
38 Office of Research Integrity Medical IRB, which served as the single IRB for this multisite study  
39 according to National Institutes of Health single IRB Policy.<sup>64</sup>  
40

41  
42  
43 **Consent:** Given the expectation that most AKI-RRT patients will be mechanically ventilated, consent  
44 will be obtained prior to enrollment from a legally authorized representative if necessary. Consent will be  
45 obtained by the local research team, which may include the site principal investigator, coinvestigators, or  
46 research assistants. Patients will be identified based on discussion with nephrology consult teams  
47 regarding patients about to be initiated on CRRT. The patient or the patient's legally authorized  
48 representative will undergo detailed consent and will be given a copy of the signed consent form.  
49  
50  
51  
52  
53  
54  
55  
56  
57

1  
2  
3 **Confidentiality:** Confidentiality of the data obtained from enrolled participants will be achieved by  
4 storing the data using REDCap data management to reduce the risk of accidental loss of confidentiality.  
5  
6 Each patient will be assigned a unique research ID, which will be used to identify the REDCap record and  
7  
8 the biospecimens in storage for each patient. Once all data are collected, the records will be de-identified  
9  
10 by removing any identifying information including medical record numbers, names, and dates of birth and  
11  
12 hospital admission.  
13  
14

15  
16 **Data Access:** The final de-identified dataset will be made fully accessible upon reasonable request once  
17  
18 the results are published.  
19

20 **Dissemination Policy:** We intend to disseminate results to participants, healthcare professionals, the  
21  
22 public, and other relevant groups via conference presentation and publication and without any publication  
23  
24 restrictions. The final manuscript will be drafted by the primary investigators. We plan to grant public  
25  
26 access to the full protocol, participant-level dataset, and statistical code upon reasonable request.  
27  
28  
29  
30  
31  
32  
33  
34  
35  
36  
37  
38  
39  
40  
41  
42  
43  
44  
45  
46  
47  
48  
49  
50  
51  
52  
53  
54  
55  
56  
57

**Author Contributions:**

Conceptualization: JPT, BRG, JAN, KPM

Methodology: JPT, BRG, CAP, FGS, NJ, BMJ, YY, NG, HPI, LG, JAN, KPM

Resources: JPT, BRG, CAP, FGS, NJ, BMJ, YY, NG, HPI, JAN, KPM

Writing (Original Draft): JPT, BRG, JAN, KPM

Review and Editing: JPT, BRG, CAP, FGS, NJ, BMJ, YY, NG, HPI, LG, JAN, KPM

Funding Acquisition: JPT, BRG, NJ, BMJ, YY, JAN, KPM

**Funding:** This work is supported by a Clinical and Translational Award (CTSA) Inter-Institutional Pilot Project Award (U24TR002260 from the National Institutes of Health (NIH) National Center for Advancing Translational Sciences (NCATS). The funder of the study had no role in study design. JAN is supported by grants from the NIH National Institute of Diabetes and Digestive and Kidney Diseases (NIDDK), including R01DK128208, U01DK12998, and P30DK079337. KPM is supported by the NIH National Institute of Arthritis and Musculoskeletal and Skin Disease under award number K23-AR079583.

**Declaration of Interests:** The authors have no conflicts of interest to declare.

## References:

1. Hoste EA, Bagshaw SM, Bellomo R, et al. Epidemiology of acute kidney injury in critically ill patients: the multinational AKI-EPI study. *Intensive Care Med* 2015;41(8):1411-23. doi: 10.1007/s00134-015-3934-7 [published Online First: 2015/07/15]
2. Cerda J, Liu KD, Cruz DN, et al. Promoting Kidney Function Recovery in Patients with AKI Requiring RRT. *Clin J Am Soc Nephrol* 2015;10(10):1859-67. doi: 10.2215/CJN.01170215 [published Online First: 20150702]
3. Group KDIGOKAKIW. KDIGO Clinical Practice Guideline for Acute Kidney Injury. *Kidney Int Suppl* 2012;2(1):2-138.
4. Sparrow HG, Swan JT, Moore LW, et al. Disparate outcomes observed within Kidney Disease: Improving Global Outcomes (KDIGO) acute kidney injury stage 1. *Kidney Int* 2019;95(4):905-13. doi: 10.1016/j.kint.2018.11.030 [published Online First: 2019/03/02]
5. Cho KC, Himmelfarb J, Paganini E, et al. Survival by dialysis modality in critically ill patients with acute kidney injury. *Journal of the American Society of Nephrology : JASN* 2006;17(11):3132-8. doi: 10.1681/asn.2006030268 [published Online First: 2006/10/06]
6. Gameiro J, Marques F, Lopes JA. Long-term consequences of acute kidney injury: a narrative review. *Clin Kidney J* 2021;14(3):789-804. doi: 10.1093/ckj/sfaa177 [published Online First: 20201119]
7. Mehta RL, Bouchard J, Soroko SB, et al. Sepsis as a cause and consequence of acute kidney injury: Program to Improve Care in Acute Renal Disease. *Intensive Care Med* 2011;37(2):241-8. doi: 10.1007/s00134-010-2089-9 [published Online First: 2010/12/15]
8. Griffin BR, Teixeira JP, Ambruso S, et al. Stage 1 acute kidney injury is independently associated with infection following cardiac surgery. *J Thorac Cardiovasc Surg* 2021;161(4):1346-55 e3. doi: 10.1016/j.jtcvs.2019.11.004 [published Online First: 2020/02/03]
9. Formeck CL, Joyce EL, Fuhrman DY, et al. Association of Acute Kidney Injury With Subsequent Sepsis in Critically Ill Children. *Pediatr Crit Care Med* 2021;22(1):e58-e66. doi: 10.1097/PCC.0000000000002541
10. Formeck CL, Feldman R, Althouse AD, et al. Risk and Timing of De Novo Sepsis in Critically Ill Children Following Acute Kidney Injury. *Kidney360* 2023;10.34067/KID.0005082022. doi: 10.34067/kid.0005082022
11. Wang WJ, Chao CT, Huang YC, et al. The impact of acute kidney injury with temporary dialysis on the risk of fracture. *J Bone Miner Res* 2014;29(3):676-84. doi: 10.1002/jbmr.2061 [published Online First: 2013/08/10]
12. Wu VC, Wu PC, Wu CH, et al. The impact of acute kidney injury on the long-term risk of stroke. *J Am Heart Assoc* 2014;3(4) doi: 10.1161/JAHA.114.000933 [published Online First: 2014/07/17]
13. Wu PC, Wu CJ, Lin CJ, et al. Long-term risk of upper gastrointestinal hemorrhage after advanced AKI. *Clin J Am Soc Nephrol* 2015;10(3):353-62. doi: 10.2215/CJN.01240214 [published Online First: 2014/12/21]
14. Guerra C, Linde-Zwirble WT, Wunsch H. Risk factors for dementia after critical illness in elderly Medicare beneficiaries. *Critical care (London, England)* 2012;16(6):R233. doi: 10.1186/cc11901 [published Online First: 2012/12/19]
15. Teixeira JP, Mayer KP, Griffin BR, et al. Intensive Care Unit-Acquired Weakness in Patients With Acute Kidney Injury: A Contemporary Review. *Am J Kidney Dis* 2022 doi: 10.1053/j.ajkd.2022.08.028 [published Online First: 20221101]
16. Wang XH, Mitch WE, Price SR. Pathophysiological mechanisms leading to muscle loss in chronic kidney disease. *Nat Rev Nephrol* 2022;18(3):138-52. doi: 10.1038/s41581-021-00498-0 [published Online First: 20211108]

17. Kress JP, Hall JB. ICU-acquired weakness and recovery from critical illness. *N Engl J Med* 2014;370(17):1626-35. doi: 10.1056/NEJMra1209390
18. Latronico N, Herridge M, Hopkins RO, et al. The ICM research agenda on intensive care unit-acquired weakness. *Intensive Care Med* 2017 doi: 10.1007/s00134-017-4757-5 [published Online First: 2017/03/16]
19. Hermans G, Van den Berghe G. Clinical review: intensive care unit acquired weakness. *Critical care (London, England)* 2015;19:274. doi: 10.1186/s13054-015-0993-7 [published Online First: 2015/08/06]
20. Koukourikos K, Tsaloglidou A, Kourkouta L. Muscle atrophy in intensive care unit patients. *Acta Inform Med* 2014;22(6):406-10. doi: 10.5455/aim.2014.22.406-410 [published Online First: 2015/02/17]
21. Mayer KP, Welle MM, Evans CG, et al. Muscle Power is Related to Physical Function in Patients Surviving Acute Respiratory Failure: A Prospective Observational Study. *Am J Med Sci* 2020 doi: 10.1016/j.amjms.2020.09.018 [published Online First: 2020/11/16]
22. Fiaccadori E, Regolisti G, Cabassi A. Specific nutritional problems in acute kidney injury, treated with non-dialysis and dialytic modalities. *NDT Plus* 2010;3(1):1-7. doi: 10.1093/ndtplus/sfp017 [published Online First: 2010/02/01]
23. Berg A, Norberg A, Martling CR, et al. Glutamine kinetics during intravenous glutamine supplementation in ICU patients on continuous renal replacement therapy. *Intensive Care Med* 2007;33(4):660-6. doi: 10.1007/s00134-007-0547-9 [published Online First: 2007/02/24]
24. Druml W, Fischer M, Liebisch B, et al. Elimination of amino acids in renal failure. *Am J Clin Nutr* 1994;60(3):418-23. doi: 10.1093/ajcn/60.3.418 [published Online First: 1994/09/01]
25. Druml W. Nutritional management of acute renal failure. *Am J Kidney Dis* 2001;37(1 Suppl 2):S89-94. doi: 10.1053/ajkd.2001.20757 [published Online First: 2001/02/13]
26. Oh WC, Mafrici B, Rigby M, et al. Micronutrient and Amino Acid Losses During Renal Replacement Therapy for Acute Kidney Injury. *Kidney Int Rep* 2019;4(8):1094-108. doi: 10.1016/j.ekir.2019.05.001 [published Online First: 2019/08/24]
27. Ostermann M, Summers J, Lei K, et al. Micronutrients in critically ill patients with severe acute kidney injury - a prospective study. *Sci Rep* 2020;10(1):1505. doi: 10.1038/s41598-020-58115-2 [published Online First: 2020/02/01]
28. Hermans G, De Jonghe B, Bruyninckx F, et al. Clinical review: Critical illness polyneuropathy and myopathy. *Critical care (London, England)* 2008;12(6):238. doi: 10.1186/cc7100 [published Online First: 20081125]
29. Lambell KJ, Tierney AC, Wang JC, et al. Comparison of Ultrasound-Derived Muscle Thickness With Computed Tomography Muscle Cross-Sectional Area on Admission to the Intensive Care Unit: A Pilot Cross-Sectional Study. *JPEN Journal of parenteral and enteral nutrition* 2021;45(1):136-45. doi: 10.1002/jpen.1822 [published Online First: 20200415]
30. Looijaard W, Molinger J, Weijs PJM. Measuring and monitoring lean body mass in critical illness. *Curr Opin Crit Care* 2018;24(4):241-47. doi: 10.1097/mcc.0000000000000511 [published Online First: 2018/05/31]
31. Parry SM, El-Ansary D, Cartwright MS, et al. Ultrasonography in the intensive care setting can be used to detect changes in the quality and quantity of muscle and is related to muscle strength and function. *Journal of critical care* 2015;30(5):1151.e9-14. doi: 10.1016/j.jcrc.2015.05.024 [published Online First: 2015/07/28]
32. Sarwal A, Parry SM, Berry MJ, et al. Interobserver Reliability of Quantitative Muscle Sonographic Analysis in the Critically Ill Population. *Journal of ultrasound in medicine : official journal of the American Institute of Ultrasound in Medicine* 2015;34(7):1191-200. doi: 10.7863/ultra.34.7.1191 [published Online First: 2015/06/27]

- 1  
2  
3  
4 33. Strasser EM, Draskovits T, Praschak M, et al. Association between ultrasound measurements of  
5 muscle thickness, pennation angle, echogenicity and skeletal muscle strength in the elderly. *Age*  
6 (*Dordrecht, Netherlands*) 2013;35(6):2377-88. doi: 10.1007/s11357-013-9517-z [published  
7 Online First: 2013/03/05]
- 8 34. Zaidman CM, Wu JS, Wilder S, et al. Minimal training is required to reliably perform quantitative  
9 ultrasound of muscle. *Muscle & nerve* 2014;50(1):124-28. doi: 10.1002/mus.24117
- 10 35. Mayer KP, Dhar S, Cassity E, et al. Interrater Reliability of Muscle Ultrasonography Image Acquisition  
11 by Physical Therapists in Patients Who Have or Who Survived Critical Illness. *Phys Ther*  
12 2020;100(9):1701-11. doi: 10.1093/ptj/pzaa068
- 13 36. Sabatino A, Regolisti G, Bozzoli L, et al. Reliability of bedside ultrasound for measurement of  
14 quadriceps muscle thickness in critically ill patients with acute kidney injury. *Clinical nutrition*  
15 (*Edinburgh, Scotland*) 2016 doi: 10.1016/j.clnu.2016.09.029 [published Online First: 2016/10/17]
- 16 37. Inker LA, Eneanya ND, Coresh J, et al. New Creatinine- and Cystatin C-Based Equations to Estimate  
17 GFR without Race. *N Engl J Med* 2021;385(19):1737-49. doi: 10.1056/NEJMoa2102953  
18 [published Online First: 20210923]
- 19 38. Mayer KP, Thompson Bastin ML, Montgomery-Yates AA, et al. Acute skeletal muscle wasting and  
20 dysfunction predict physical disability at hospital discharge in patients with critical illness.  
21 *Critical care (London, England)* 2020;24(1):637. doi: 10.1186/s13054-020-03355-x [published  
22 Online First: 20201104]
- 23 39. Mayer KP, Ortiz-Soriano VM, Kalantar A, et al. Acute kidney injury contributes to worse physical and  
24 quality of life outcomes in survivors of critical illness. *BMC Nephrol* 2022;23(1):137. doi:  
25 10.1186/s12882-022-02749-z [published Online First: 20220407]
- 26 40. Hodgson C, Needham D, Haines K, et al. Feasibility and inter-rater reliability of the ICU Mobility  
27 Scale. *Heart Lung* 2014;43(1):19-24. doi: 10.1016/j.hrtlng.2013.11.003 [published Online First:  
28 20131119]
- 29 41. Tipping CJ, Bailey MJ, Bellomo R, et al. The ICU Mobility Scale Has Construct and Predictive Validity  
30 and Is Responsive. A Multicenter Observational Study. *Ann Am Thorac Soc* 2016;13(6):887-93.  
31 doi: 10.1513/AnnalsATS.201510-717OC
- 32 42. Hermans G, Clerckx B, Vanhullebusch T, et al. Interobserver agreement of Medical Research Council  
33 sum-score and handgrip strength in the intensive care unit. *Muscle & nerve* 2012;45(1):18-25.  
34 doi: 10.1002/mus.22219 [published Online First: 2011/12/23]
- 35 43. Parry SM, Berney S, Granger CL, et al. A new two-tier strength assessment approach to the diagnosis  
36 of weakness in intensive care: an observational study. *Critical care (London, England)*  
37 2015;19(1):52. doi: 10.1186/s13054-015-0780-5 [published Online First: 20150226]
- 38 44. Vanpee G, Segers J, Van Mechelen H, et al. The interobserver agreement of handheld dynamometry  
39 for muscle strength assessment in critically ill patients. *Crit Care Med* 2011;39(8):1929-34. doi:  
40 10.1097/CCM.0b013e31821f050b
- 41 45. Bakhru RN, Davidson JF, Bookstaver RE, et al. Physical function impairment in survivors of critical  
42 illness in an ICU Recovery Clinic. *Journal of critical care* 2018;45:163-69. doi:  
43 10.1016/j.jcrc.2018.02.001 [published Online First: 20180203]
- 44 46. Parry SM, Denehy L, Beach LJ, et al. Functional outcomes in ICU - what should we be using? - an  
45 observational study. *Critical care (London, England)* 2015;19(1):127. doi: 10.1186/s13054-015-  
46 0829-5 [published Online First: 20150329]
- 47 47. Elliott D, Denehy L, Berney S, et al. Assessing physical function and activity for survivors of a critical  
48 illness: a review of instruments. *Aust Crit Care* 2011;24(3):155-66. doi:  
49 10.1016/j.aucc.2011.05.002 [published Online First: 20110701]
- 50  
51  
52  
53  
54  
55  
56  
57  
58  
59  
60



- 1  
2  
3 48. Denehy L, Nordon-Craft A, Edbrooke L, et al. Outcome measures report different aspects of patient  
4 function three months following critical care. *Intensive Care Med* 2014;40(12):1862-9. doi:  
5 10.1007/s00134-014-3513-3 [published Online First: 20141016]  
6  
7 49. Connolly B. Describing and measuring recovery and rehabilitation after critical illness. *Curr Opin Crit*  
8 *Care* 2015;21(5):445-52. doi: 10.1097/MCC.0000000000000233  
9  
10 50. Laboratories ATSCoPSfCPF. ATS statement: guidelines for the six-minute walk test. *Am J Respir Crit*  
11 *Care Med* 2002;166(1):111-7. doi: 10.1164/ajrccm.166.1.at1102  
12  
13 51. Needham DM, Sepulveda KA, Dinglas VD, et al. Core Outcome Measures for Clinical Research in  
14 Acute Respiratory Failure Survivors. An International Modified Delphi Consensus Study. *Am J*  
15 *Respir Crit Care Med* 2017;196(9):1122-30. doi: 10.1164/rccm.201702-0372OC  
16  
17 52. Parry SM, Nalamalapu SR, Nunna K, et al. Six-Minute Walk Distance After Critical Illness: A  
18 Systematic Review and Meta-Analysis. *J Intensive Care Med* 2021;36(3):343-51. doi:  
19 10.1177/0885066619885838 [published Online First: 20191105]  
20  
21 53. Herdman M, Gudex C, Lloyd A, et al. Development and preliminary testing of the new five-level  
22 version of EQ-5D (EQ-5D-5L). *Qual Life Res* 2011;20(10):1727-36. doi: 10.1007/s11136-011-  
23 9903-x [published Online First: 20110409]  
24  
25 54. Cuthbertson BH, Roughton S, Jenkinson D, et al. Quality of life in the five years after intensive care: a  
26 cohort study. *Critical care (London, England)* 2010;14(1):R6. doi: 10.1186/cc8848 [published  
27 Online First: 20100120]  
28  
29 55. Ferrao C, Quintaneiro C, Camila C, et al. Evaluation of long-term outcomes of very old patients  
30 admitted to intensive care: Survival, functional status, quality of life, and quality-adjusted life-  
31 years. *Journal of critical care* 2015;30(5):1150 e7-11. doi: 10.1016/j.jcrc.2015.05.005 [published  
32 Online First: 20150519]  
33  
34 56. Brummel NE, Bell SP, Girard TD, et al. Frailty and Subsequent Disability and Mortality among Patients  
35 with Critical Illness. *Am J Respir Crit Care Med* 2017;196(1):64-72. doi: 10.1164/rccm.201605-  
36 0939OC  
37  
38 57. Darvall JN, Greentree K, Braat MS, et al. Contributors to frailty in critical illness: Multi-dimensional  
39 analysis of the Clinical Frailty Scale. *Journal of critical care* 2019;52:193-99. doi:  
40 10.1016/j.jcrc.2019.04.032 [published Online First: 20190502]  
41  
42 58. Shears M, Takaoka A, Rochweg B, et al. Assessing frailty in the intensive care unit: A reliability and  
43 validity study. *J Crit Care* 2018;45:197-203. doi: 10.1016/j.jcrc.2018.02.004 [published Online  
44 First: 2018/03/27]  
45  
46 59. Neufeld KJ, Leoutsakos JS, Yan H, et al. Fatigue Symptoms During the First Year Following ARDS.  
47 *Chest* 2020;158(3):999-1007. doi: 10.1016/j.chest.2020.03.059 [published Online First:  
48 20200415]  
49  
50 60. Spadaro S, Capuzzo M, Valpiani G, et al. Fatigue in intensive care survivors one year after discharge.  
51 *Health Qual Life Outcomes* 2016;14(1):148. doi: 10.1186/s12955-016-0554-z [published Online  
52 First: 20161018]  
53  
54 61. Ware JE, Jr., Sherbourne CD. The MOS 36-item short-form health survey (SF-36). I. Conceptual  
55 framework and item selection. *Med Care* 1992;30(6):473-83.  
56  
57 62. Harris PA, Taylor R, Thielke R, et al. Research electronic data capture (REDCap)--a metadata-driven  
58 methodology and workflow process for providing translational research informatics support. *J*  
59 *Biomed Inform* 2009;42(2):377-81. doi: 10.1016/j.jbi.2008.08.010 [published Online First:  
60 20080930]  
61  
62 63. Vincent JL, Moreno R, Takala J, et al. The SOFA (Sepsis-related Organ Failure Assessment) score to  
63 describe organ dysfunction/failure. On behalf of the Working Group on Sepsis-Related Problems  
64 of the European Society of Intensive Care Medicine. *Intensive Care Med* 1996;22(7):707-10. doi:  
65 10.1007/BF01709751 [published Online First: 1996/07/01]

1  
2  
3 64. Single IRB for Multi-Site or Cooperative Research [Available from:  
4 <https://grants.nih.gov/policy/humansubjects/single-irb-policy-multi-site-research.htm> accessed  
5 January 12, 2023.  
6  
7  
8  
9  
10  
11  
12  
13  
14  
15  
16  
17  
18  
19  
20  
21  
22  
23  
24  
25  
26  
27  
28  
29  
30  
31  
32  
33  
34  
35  
36  
37  
38  
39  
40  
41  
42  
43  
44  
45  
46  
47  
48  
49  
50  
51  
52  
53  
54  
55  
56  
57  
58  
59  
60

For peer review only

### **Figure Legends**

Figure 1: Representative images of ultrasound acquisition techniques and the obtained image of the rectus femoris muscle.

*Caption: Panel A is a representative ultrasound image with anatomical structures labeled for the quadriceps muscle. Panel B demonstrates the technique to locate the anatomical landmarks for rectus femoris ultrasound (two-thirds of the distance from anterior superior iliac spine to the superior border of the patella). Panel C depicts the-minimal-to-no-compression technique using the ultrasound probe with adequate ultrasound transmission gel to obtain images.*

*\* These images were staged by the authors to demonstrate appropriate technique and were not taken from a patient encounter.*

Figure 2: Representative image of the performance of hand-held dynamometry to measure isometric knee extensor strength with a subject in the supine position with a towel roll keeping the knee in 20-30 degrees of flexion.

*\* This image was staged by the authors to demonstrate appropriate technique and was not taken from a patient encounter.*

1  
2  
3  
4  
5  
6  
7  
8  
9  
10  
11  
12  
13  
14  
15  
16  
17  
18  
19  
20  
21  
22  
23  
24  
25  
26  
27  
28  
29  
30  
31  
32  
33  
34  
35  
36  
37  
38  
39  
40  
41  
42  
43  
44  
45  
46  
47  
48  
49  
50  
51  
52  
53  
54  
55  
56  
57  
58  
59  
60

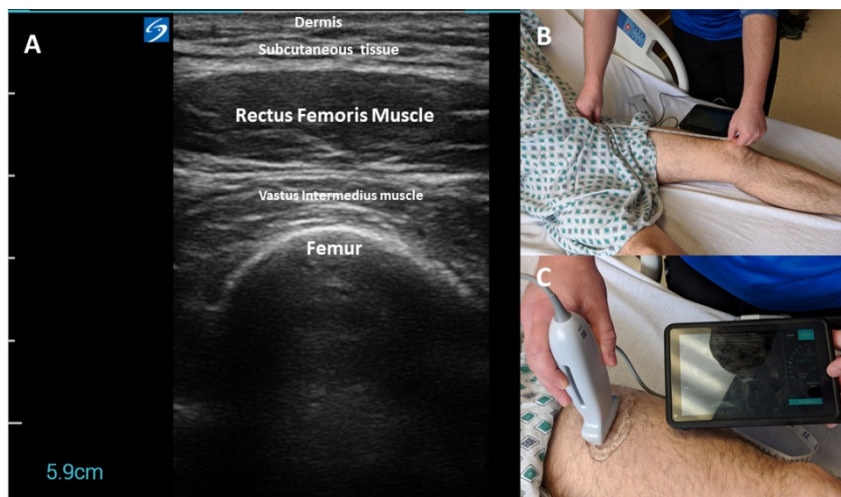

338x190mm (96 x 96 DPI)

1  
2  
3  
4  
5  
6  
7  
8  
9  
10  
11  
12  
13  
14  
15  
16  
17  
18  
19  
20  
21  
22  
23  
24  
25  
26  
27  
28  
29  
30  
31  
32  
33  
34  
35  
36  
37  
38  
39  
40  
41  
42  
43  
44  
45  
46  
47  
48  
49  
50  
51  
52  
53  
54  
55  
56  
57  
58  
59  
60

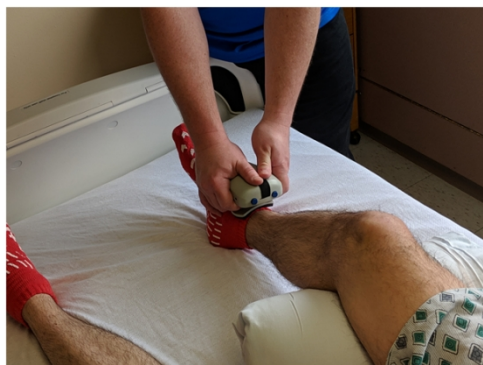

338x190mm (96 x 96 DPI)

1  
2  
3 End-of-study feedback survey for research study, "The Impact of Renal Replacement Therapy on the  
4 Development of Critical Illness Muscle Wasting"  
5  
6  
7

8 Patient subject no.: \_\_\_\_\_  
9  
10  
11  
12

13  
14 Thank you for participating in our study about the effects of acute kidney injury in the intensive care unit  
15 on muscle loss and muscle weakness. We ask that you to please fill out this brief survey to help us  
16 determine what kind of research would be best in the future.  
17  
18  
19

- 20  
21 1. Of all the tests we completed, including the different surveys you took and the different types of  
22 functional tests we performed, which one do you think was the most important or valuable to you  
23 as a survivor of acute kidney injury? Multiple answers are okay.  
24  
25  
26  
27  
28  
29  
30  
31  
32 2. Is there anything else about muscle strength and physical function that you think we should test or  
33 measure in future research in patients like yourself?  
34  
35  
36  
37  
38  
39  
40  
41  
42  
43  
44  
45  
46  
47  
48  
49  
50  
51  
52  
53  
54  
55  
56  
57  
58  
59  
60

STROBE Statement—Checklist of items that should be included in reports of *cohort studies*

|                           | Item No | Recommendation                                                                                                                                                                                    | Page No      |
|---------------------------|---------|---------------------------------------------------------------------------------------------------------------------------------------------------------------------------------------------------|--------------|
| <b>Title and abstract</b> | 1       | (a) Indicate the study's design with a commonly used term in the title or the abstract                                                                                                            | 1            |
|                           |         | (b) Provide in the abstract an informative and balanced summary of what was done and what was found                                                                                               | 2            |
| <b>Introduction</b>       |         |                                                                                                                                                                                                   |              |
| Background/rationale      | 2       | Explain the scientific background and rationale for the investigation being reported                                                                                                              | 4-5          |
| Objectives                | 3       | State specific objectives, including any prespecified hypotheses                                                                                                                                  | 5-6          |
| <b>Methods</b>            |         |                                                                                                                                                                                                   |              |
| Study design              | 4       | Present key elements of study design early in the paper                                                                                                                                           | 6            |
| Setting                   | 5       | Describe the setting, locations, and relevant dates, including periods of recruitment, exposure, follow-up, and data collection                                                                   | 6, 11-12, 23 |
| Participants              | 6       | (a) Give the eligibility criteria, and the sources and methods of selection of participants. Describe methods of follow-up                                                                        | 6-7, 11, 23  |
|                           |         | (b) For matched studies, give matching criteria and number of exposed and unexposed                                                                                                               | N/A          |
| Variables                 | 7       | Clearly define all outcomes, exposures, predictors, potential confounders, and effect modifiers. Give diagnostic criteria, if applicable                                                          | 7-10         |
| Data sources/measurement  | 8*      | For each variable of interest, give sources of data and details of methods of assessment (measurement). Describe comparability of assessment methods if there is more than one group              | 7-10, 12-14  |
| Bias                      | 9       | Describe any efforts to address potential sources of bias                                                                                                                                         | 10-11; 12-14 |
| Study size                | 10      | Explain how the study size was arrived at                                                                                                                                                         | 11           |
| Quantitative variables    | 11      | Explain how quantitative variables were handled in the analyses. If applicable, describe which groupings were chosen and why                                                                      | 12-14        |
| Statistical methods       | 12      | (a) Describe all statistical methods, including those used to control for confounding                                                                                                             | 12-14        |
|                           |         | (b) Describe any methods used to examine subgroups and interactions                                                                                                                               | 12-14        |
|                           |         | (c) Explain how missing data were addressed                                                                                                                                                       | N/A          |
|                           |         | (d) If applicable, explain how loss to follow-up was addressed                                                                                                                                    | N/A          |
|                           |         | (e) Describe any sensitivity analyses                                                                                                                                                             | N/A          |
| <b>Results</b>            |         |                                                                                                                                                                                                   |              |
| Participants              | 13*     | (a) Report numbers of individuals at each stage of study—eg numbers potentially eligible, examined for eligibility, confirmed eligible, included in the study, completing follow-up, and analysed | N/A          |
|                           |         | (b) Give reasons for non-participation at each stage                                                                                                                                              | N/A          |
|                           |         | (c) Consider use of a flow diagram                                                                                                                                                                | N/A          |
| Descriptive data          | 14*     | (a) Give characteristics of study participants (eg demographic, clinical, social) and information on exposures and potential confounders                                                          | N/A          |
|                           |         | (b) Indicate number of participants with missing data for each variable of interest                                                                                                               | N/A          |
|                           |         | (c) Summarise follow-up time (eg, average and total amount)                                                                                                                                       | N/A          |
| Outcome data              | 15*     | Report numbers of outcome events or summary measures over time                                                                                                                                    | N/A          |

|    |                          |    |                                                                                                                                                                                                              |     |
|----|--------------------------|----|--------------------------------------------------------------------------------------------------------------------------------------------------------------------------------------------------------------|-----|
| 1  | Main results             | 16 | (a) Give unadjusted estimates and, if applicable, confounder-adjusted estimates and their precision (eg, 95% confidence interval). Make clear which confounders were adjusted for and why they were included | N/A |
| 2  |                          |    | (b) Report category boundaries when continuous variables were categorized                                                                                                                                    | N/A |
| 3  |                          |    | (c) If relevant, consider translating estimates of relative risk into absolute risk for a meaningful time period                                                                                             | N/A |
| 4  | Other analyses           | 17 | Report other analyses done—eg analyses of subgroups and interactions, and sensitivity analyses                                                                                                               | N/A |
| 5  | <b>Discussion</b>        |    |                                                                                                                                                                                                              |     |
| 6  | Key results              | 18 | Summarise key results with reference to study objectives                                                                                                                                                     | N/A |
| 7  | Limitations              | 19 | Discuss limitations of the study, taking into account sources of potential bias or imprecision. Discuss both direction and magnitude of any potential bias                                                   | 3   |
| 8  | Interpretation           | 20 | Give a cautious overall interpretation of results considering objectives, limitations, multiplicity of analyses, results from similar studies, and other relevant evidence                                   | N/A |
| 9  | Generalisability         | 21 | Discuss the generalisability (external validity) of the study results                                                                                                                                        | N/A |
| 10 | <b>Other information</b> |    |                                                                                                                                                                                                              |     |
| 11 | Funding                  | 22 | Give the source of funding and the role of the funders for the present study and, if applicable, for the original study on which the present article is based                                                | 16  |

\*Give information separately for exposed and unexposed groups.

**Note:** An Explanation and Elaboration article discusses each checklist item and gives methodological background and published examples of transparent reporting. The STROBE checklist is best used in conjunction with this article (freely available on the Web sites of PLoS Medicine at <http://www.plosmedicine.org/>, Annals of Internal Medicine at <http://www.annals.org/>, and Epidemiology at <http://www.epidem.com/>). Information on the STROBE Initiative is available at <http://www.strobe-statement.org>.



# BMJ Open

## Critical Illness Myopathy and Trajectory of Recovery in Acute Kidney Injury Requiring Continuous Renal Replacement Therapy: A Prospective Observational Trial Protocol

|                                 |                                                                                                                                                                                                                                                                                                                                                                                                                                                                                                                                                                                                                                                                                                                                                                                                                                                                                                                                                                                                                                                                                                                                                                                                                                                                                                                                                                                                                                                                                                                                                                                                       |
|---------------------------------|-------------------------------------------------------------------------------------------------------------------------------------------------------------------------------------------------------------------------------------------------------------------------------------------------------------------------------------------------------------------------------------------------------------------------------------------------------------------------------------------------------------------------------------------------------------------------------------------------------------------------------------------------------------------------------------------------------------------------------------------------------------------------------------------------------------------------------------------------------------------------------------------------------------------------------------------------------------------------------------------------------------------------------------------------------------------------------------------------------------------------------------------------------------------------------------------------------------------------------------------------------------------------------------------------------------------------------------------------------------------------------------------------------------------------------------------------------------------------------------------------------------------------------------------------------------------------------------------------------|
| Journal:                        | <i>BMJ Open</i>                                                                                                                                                                                                                                                                                                                                                                                                                                                                                                                                                                                                                                                                                                                                                                                                                                                                                                                                                                                                                                                                                                                                                                                                                                                                                                                                                                                                                                                                                                                                                                                       |
| Manuscript ID                   | bmjopen-2023-072448.R1                                                                                                                                                                                                                                                                                                                                                                                                                                                                                                                                                                                                                                                                                                                                                                                                                                                                                                                                                                                                                                                                                                                                                                                                                                                                                                                                                                                                                                                                                                                                                                                |
| Article Type:                   | Protocol                                                                                                                                                                                                                                                                                                                                                                                                                                                                                                                                                                                                                                                                                                                                                                                                                                                                                                                                                                                                                                                                                                                                                                                                                                                                                                                                                                                                                                                                                                                                                                                              |
| Date Submitted by the Author:   | 24-Apr-2023                                                                                                                                                                                                                                                                                                                                                                                                                                                                                                                                                                                                                                                                                                                                                                                                                                                                                                                                                                                                                                                                                                                                                                                                                                                                                                                                                                                                                                                                                                                                                                                           |
| Complete List of Authors:       | Teixeira, J. Pedro; University of New Mexico School of Medicine, Divisions of Nephrology and Pulmonary, Critical Care, and Sleep Medicine; University of New Mexico Health Sciences Center, Center for Adult Critical Care<br>Griffin, Benjamin R; University of Iowa Hospitals and Clinics, Division of Nephrology<br>Pal, Chaitanya; University of New Mexico School of Medicine, Division of Nephrology<br>González-Seguel, Felipe; Clinica Alemana de Santiago SA, Servicio Medicina Física y Rehabilitación; Universidad del Desarrollo, Facultad de Medicina<br>Jenkins, Nathaniel; The University of Iowa, Department of Health and Human Physiology<br>Jones, Beth; University of New Mexico School of Medicine, Department of Orthopedics & Rehabilitation<br>Yoshida, Yuri; University of New Mexico School of Medicine, Department of Orthopedics & Rehabilitation<br>George, Naomi; University of New Mexico School of Medicine, Department of Emergency Medicine; University of New Mexico Health Sciences Center, Center for Adult Critical Care<br>Israel, Hayley; University of New Mexico School of Medicine, Division of Pulmonary, Critical Care, and Sleep Medicine; University of New Mexico Health Sciences Center, Center for Adult Critical Care<br>Ghazi, Lama; The University of Alabama at Birmingham School of Public Health, Department of Epidemiology<br>Neyra, Javier; The University of Alabama at Birmingham Heersink School of Medicine, Division of Nephrology<br>Mayer, Kirby; University of Kentucky College of Health Sciences, Department of Physical Therapy |
| <b>Primary Subject Heading</b>: | Intensive care                                                                                                                                                                                                                                                                                                                                                                                                                                                                                                                                                                                                                                                                                                                                                                                                                                                                                                                                                                                                                                                                                                                                                                                                                                                                                                                                                                                                                                                                                                                                                                                        |
| Secondary Subject Heading:      | Rehabilitation medicine, Renal medicine, Research methods                                                                                                                                                                                                                                                                                                                                                                                                                                                                                                                                                                                                                                                                                                                                                                                                                                                                                                                                                                                                                                                                                                                                                                                                                                                                                                                                                                                                                                                                                                                                             |
| Keywords:                       | Acute renal failure < NEPHROLOGY, Adult intensive & critical care < INTENSIVE & CRITICAL CARE, Dialysis < NEPHROLOGY, Neuromuscular disease < NEUROLOGY, REHABILITATION MEDICINE, Rehabilitation                                                                                                                                                                                                                                                                                                                                                                                                                                                                                                                                                                                                                                                                                                                                                                                                                                                                                                                                                                                                                                                                                                                                                                                                                                                                                                                                                                                                      |

1  
2  
3  
4  
5  
6  
7  
8  
9  
10  
11  
12  
13  
14  
15  
16  
17  
18  
19  
20  
21  
22  
23  
24  
25  
26  
27  
28  
29  
30  
31  
32  
33  
34  
35  
36  
37  
38  
39  
40  
41  
42  
43  
44  
45  
46  
47  
48  
49  
50  
51  
52  
53  
54  
55  
56  
57  
58  
59  
60

|  |                              |
|--|------------------------------|
|  | medicine < INTERNAL MEDICINE |
|  |                              |

SCHOLARONE™  
Manuscripts

1  
2  
3 **1 Critical Illness Myopathy and Trajectory of Recovery in Acute Kidney Injury Requiring**

4  
5 **2 Continuous Renal Replacement Therapy: A Prospective Observational Trial Protocol**

6  
7 **3 J. Pedro Teixeira<sup>1,2,3\*</sup>, Benjamin R. Griffin<sup>4\*</sup>, C. Anil Pal<sup>1</sup>, Felipe Gonzalez-Seguel<sup>5</sup>, Nathaniel Jenkins<sup>6</sup>,**

8  
9 **4 Beth M. Jones<sup>7</sup>, Yuri Yoshida<sup>7</sup>, Naomi George<sup>3,8</sup>, Hayley P. Israel<sup>2,3</sup>, Lama Ghazi<sup>9</sup>, Javier A. Neyra<sup>10</sup>,**

10  
11 **5 Kirby P. Mayer<sup>11,12</sup>**

12  
13 <sup>1</sup>Division of Nephrology, University of New Mexico School of Medicine, Albuquerque, NM

14  
15 <sup>2</sup>Division of Pulmonary, Critical Care, and Sleep Medicine, University of New Mexico School of  
16  
17 Medicine, Albuquerque, NM

18  
19 <sup>3</sup>Center for Adult Critical Care, University of New Mexico Health Sciences Center, Albuquerque, NM

20  
21 <sup>4</sup>Division of Nephrology, University of Iowa Hospitals and Clinics, Iowa City, IA

22  
23 <sup>5</sup>Servicio de Medicina Física y Rehabilitación, Clínica Alemana Universidad del Desarrollo, Santiago,  
24  
25 Chile

26  
27 <sup>6</sup>Department of Health and Human Physiology, University of Iowa, Iowa City, IA

28  
29 <sup>7</sup>Division of Physical Therapy, Department of Orthopedics & Rehabilitation, University of New Mexico  
30  
31 School of Medicine, Albuquerque, NM

32  
33 <sup>8</sup>Department of Emergency Medicine, University of New Mexico School of Medicine, Albuquerque, NM

34  
35 <sup>9</sup>Department of Epidemiology, School of Public Health, University of Alabama at Birmingham,  
36  
37 Birmingham, AL

38  
39 <sup>10</sup>Division of Nephrology, Heersink School of Medicine, University of Alabama at Birmingham,  
40  
41 Birmingham, AL

42  
43 <sup>11</sup>Department of Physical Therapy, College of Health Sciences, University of Kentucky, Lexington, KY

44  
45 <sup>12</sup>Center for Muscle Biology, University of Kentucky, Lexington, KY

46  
47 \*JPT and BRG contributed equally to this work.

48  
49 **Corresponding author:**

50  
51 J. Pedro Teixeira, MD

52  
53 MSC10-5550, 1 University of New Mexico

54  
55 Albuquerque, New Mexico 87131

56  
57 [jteixeira@salud.unm.edu](mailto:jteixeira@salud.unm.edu)

58  
59 505-272-4751

60  
**Word Count:** Abstract 300, Body 4106

**Trial Registry:** ClinicalTrials.gov (NCT05287204)

**Keywords:** acute kidney injury, critical illness myopathy, renal replacement therapy, CRRT, ICU-associated weakness

**Protocol Date:** 1/7/2023

## 1 **Abstract**

2 **Introduction:** Acute kidney injury requiring renal replacement therapy (AKI-RRT) is common in the  
3 intensive care unit (ICU) and is associated with significant morbidity and mortality. Continuous RRT  
4 (CRRT) non-selectively removes large amounts of amino acids from plasma, lowering serum amino acid  
5 concentrations and potentially depleting total-body amino acid stores. Therefore, the morbidity and  
6 mortality associated with AKI-RRT may be partly mediated through accelerated skeletal muscle atrophy  
7 and resulting muscle weakness. However, the impact of AKI-RRT on skeletal muscle mass and function  
8 during and following critical illness remains unknown. We hypothesize that patients with AKI-RRT have  
9 higher degrees of acute muscle loss than patients without AKI-RRT and that AKI-RRT survivors are less  
10 likely to recover muscle mass and function when compared to other ICU survivors.

11 **Methods and Analysis:** This protocol describes a prospective, multicenter, observational trial assessing  
12 skeletal muscle size, quality, and function in ICU patients with AKI-RRT. We will perform  
13 musculoskeletal ultrasound to longitudinally evaluate rectus femoris size and quality at baseline (within  
14 48 hours of CRRT initiation), day 3, day 7 or at ICU discharge, at hospital discharge, and 1-3 months  
15 post-discharge. Additional skeletal muscle and physical function tests will be performed at hospital  
16 discharge and post-discharge follow-up. We will analyze the effect of AKI-RRT by comparing the  
17 findings in enrolled subjects to historical controls of critically ill patients without AKI-RRT using  
18 multivariable modeling.

19 **Ethics and Dissemination:** We anticipate our study will reveal that AKI-RRT is associated with greater  
20 degrees of muscle loss and dysfunction along with impaired post-discharge recovery of physical function.  
21 These findings could impact the in-hospital and post-discharge treatment plan for these patients to include  
22 focused attention on muscle strength and function. We intend to disseminate findings to participants,  
23 healthcare professionals, the public, and other relevant groups via conference presentation and publication  
24 without any publication restrictions.

25

## 1 Strengths and limitations of this study

- 2 • This study has several notable strengths including the study design based on multidisciplinary  
3 collaboration, the multicenter patient representation, the collection of longitudinal in-hospital and  
4 outpatient measures and outcomes, and the wide range of skeletal muscle and physical function tests  
5 being performed.
- 6 • Due to the pilot nature of this study, we will recruit critically ill patients with acute kidney injury  
7 (AKI) requiring continuous renal replacement therapy (CRRT) to collect a broad array of study  
8 measures and compare them with available datasets of recent historical controls of critically ill  
9 patients without AKI requiring RRT. While the use of these control groups enhances the feasibility of  
10 the project, it also represents a limitation.
- 11 • The high morbidity and mortality inherent to the study population may introduce competing risk of  
12 death and selection bias when assessing the outpatient outcomes.
- 13 • Differentiating the exact contributions of AKI, CRRT, and underlying acute illness may not be  
14 possible in this observational study due to several confounding variables that could be better  
15 addressed with an interventional trial design in the future. Nonetheless, our pilot study will generate  
16 critical data for the design and sample size estimations of such future trials.

## 1 **Introduction**

2 **Background and Rationale:** Acute kidney injury (AKI) complicates approximately 20% of all hospital  
3 admissions and up to 50% of all intensive care unit (ICU) admissions.<sup>1,2</sup> Moreover, 13.5% of critically ill  
4 patients develop AKI requiring renal replacement therapy (AKI-RRT).<sup>1</sup> AKI is associated with poor  
5 short- and long-term prognoses. Even stage 1 AKI – defined by as little as a 0.3 mg/dL increase or 50%  
6 rise in serum creatinine above baseline<sup>3</sup> – is associated with up to a 10-fold increase in the odds of in-  
7 hospital mortality.<sup>4</sup> Similarly, AKI-RRT has an in-hospital mortality rate >50%, making it one of the  
8 deadliest conditions encountered in the hospital.<sup>5</sup> After discharge, AKI survivors are at increased risk of  
9 developing chronic kidney disease (CKD), end-stage kidney disease, cardiovascular disease, and death.<sup>6</sup>  
10 Other studies suggest that AKI predisposes to disparate sources of morbidity including infection<sup>7-10</sup>, bone  
11 fracture<sup>11</sup>, stroke<sup>12</sup>, GI hemorrhage<sup>13</sup>, and dementia.<sup>14</sup> While muscle wasting is well-described in patients  
12 with CKD<sup>15,16</sup>, the contribution of AKI-RRT to muscle wasting in critically ill patients has not been  
13 previously studied.

14 Acute skeletal muscle wasting occurs in up to 65% of patients admitted to the ICU.<sup>17</sup> Critical  
15 illness myopathy (CIM), defined as a deficit in muscle size and strength that develops as a result of an  
16 ICU admission, is associated with high rates of short- and long-term mortality and morbidity, including  
17 decreased quality of life (QoL) due to persistent functional mobility impairments and inability to perform  
18 simple activities of daily living.<sup>18-21</sup> AKI of any stage is known to alter tissue utilization of amino acids,  
19 making it plausible that AKI exacerbates CIM.<sup>15,22</sup> Studies have demonstrated that plasma amino acid  
20 levels are reduced and multiple non-essential amino acids become conditionally essential in the setting of  
21 AKI.<sup>23-25</sup> In addition, AKI leads to a state of increased amino acid oxidation but reduced amino acid  
22 transport into muscle.<sup>15</sup> RRT exacerbates this issue through non-selective removal of amino acids from  
23 plasma.<sup>15</sup> Amino acids are small and easily filtered during RRT, and, as a result, daily losses of amino  
24 acids in effluent can be immense at up to 18 grams daily with CRRT.<sup>26,27</sup>

25 The gold standards for assessing CIM are muscle biopsy or electrodiagnostic testing.<sup>28</sup>  
26 Furthermore, the measurement of psoas muscle area on a single cross-sectional computed tomography

1 (CT) image at the level of the L3 vertebra has been suggested as a standard clinical measure for skeletal  
2 muscle quantification.<sup>29</sup> However, biopsy, electrodiagnostic testing, and CT imaging present challenges  
3 which limit their clinical application. Musculoskeletal ultrasound (MSKUS), a relatively inexpensive,  
4 noninvasive alternative, has gained significant traction over the last decade for assessing muscle in ICU  
5 patients.<sup>30</sup> Studies have demonstrated that MSKUS has excellent inter-rater reliability and high clinical  
6 utility and have suggested that MSKUS has strong construct validity.<sup>31-35</sup> Recent data suggest that  
7 MSKUS can be reliably performed at the bedside in the ICU.<sup>36</sup>

8 The primary objective of this study is to characterize longitudinal measures of muscle size [rectus  
9 femoris (RF) muscle cross-sectional area (CSA) and muscle thickness (mT)] and quality [echo intensity  
10 (EI)] in critically ill adults with AKI requiring CRRT during their ICU stay and in post-discharge follow-  
11 up among survivors. This trial protocol was designed using the elements of the Strengthening the  
12 Reporting of Observational studies in Epidemiology (STROBE) checklist for cohort studies<sup>9</sup> whenever  
13 applicable.

### 15 Objectives:

16 Aim 1. To characterize changes in RF muscle mass and quality at baseline and days 3 and 7 following  
17 study enrollment in critically ill adults with AKI requiring CRRT and to compare these measurements  
18 with those of historical ICU controls without AKI-RRT.

19 Hypothesis 1: RF muscle mass and muscle quality will be lower at 7 days in patients with AKI-  
20 RRT compared to the corresponding inpatient measurements of historical ICU controls without  
21 AKI-RRT.

22 Aim 2. To characterize changes in RF muscle mass and quality at hospital discharge and within 3 months  
23 post-discharge in survivors of AKI requiring CRRT in the ICU and to compare these measurements with  
24 those of historical ICU controls without AKI-RRT.

25 Hypothesis 2: The muscle mass and functional parameters of survivors of AKI-RRT obtained  
26 within 3 months of hospital discharge will be worse than the corresponding measurements from

1  
2  
3 1 historical controls of ICU survivors without AKI-RRT obtained within a similar post-discharge  
4  
5 2 timeframe.

6  
7 3 Aim 3. To examine if changes in plasma or effluent amino acid levels correlate with skeletal muscle loss  
8  
9 4 during CRRT or with skeletal muscle function at 1-3 months post discharge.

10  
11 5 Hypothesis 3: The concentrations of amino acids in blood and effluent during CRRT will  
12  
13 6 correlate with MSKUS parameters of muscle mass and will be associated with muscle function  
14  
15 7 following discharge.  
16  
17  
18 8

### 19 20 9 **Methods: Participants, Interventions, and Outcomes**

21  
22 10 **Trial Design:** This is a prospective multicenter observational study to evaluate longitudinal inpatient and  
23  
24 11 outpatient measures of muscle mass and function in critically ill adults with AKI requiring CRRT and to  
25  
26 12 compare these measurements with those of historical ICU controls without AKI-RRT. The study will  
27  
28 13 have two phases, an ICU phase and a recovery phase for subjects who survive to discharge.

29  
30 14 **Study Setting:** This study will be conducted at the adult ICUs at the academic medical centers of the  
31  
32 15 University of Kentucky, University of Iowa, and University of New Mexico. Following discharge,  
33  
34 16 survivors will return for outpatient evaluation of skeletal muscle and physical function.

35  
36 17 **Eligibility Criteria:** To be included in the study, patients are required to be  $\geq 18$  years old and have AKI-  
37  
38 18 RRT with enrollment within 48 hours of CRRT initiation. Exclusion criteria include: (1) ICU admission  
39  
40 19 for  $>7$  days; (2) RRT of any kind at any time before ICU admission; (3) CKD with estimated glomerular  
41  
42 20 filtration rate  $<20$  mL/min/1.73 m<sup>2</sup> as calculated by the 2021 CKD-EPI equation<sup>37</sup>; (4) underlying muscle  
43  
44 21 disorders or muscle atrophy such as quadriplegia or hemiplegia, stroke with residual motor deficits, end-  
45  
46 22 stage liver disease, active alcohol use disorder, active malignancy (other than non-melanoma skin cancer)  
47  
48 23 within 1 year, burns, or other baseline neuromuscular disease; (5) pregnancy; (6) concomitant use of other  
49  
50 24 extracorporeal support devices such as ventricular assist devices or extracorporeal membrane  
51  
52 25 oxygenation; or (7) anticipated inability to engage in weight-bearing testing after discharge (e.g., trauma  
53  
54  
55  
56  
57  
58  
59  
60



1  
2  
3 1 or orthopedic surgery). For outpatient testing, patients will be ineligible if they remain on RRT in the  
4  
5 2 week prior to the research appointment.  
6

7 3 **Control Population:** Given the pilot nature of this study, we will use recent historical controls defined as  
8  
9 4 critically ill adults without AKI-RRT in whom similar measurements of muscle size, quality, and function  
10  
11 5 were collected. Specifically, we have previously collected data on 41 ICU patients, of which 36 did not  
12  
13 6 have AKI-RRT and will serve as the control group for the ICU phase of this study, and have published  
14  
15 7 the results of MSKUS performed in the ICU and functional assessments performed at both ICU discharge  
16  
17 8 and hospital discharge.<sup>38</sup> The controls for the recovery phase will come from an ongoing prospective  
18  
19 9 observational study being performed at the University of Kentucky, which will include outpatient  
20  
21 10 functional assessments performed on 200 ICU survivors (NCT05537298). See **Table 1** for a summary of  
22  
23 11 the demographic and clinical characteristics of the control cohorts which have been published thus far.<sup>21 38</sup>  
24  
25  
26 12 <sup>39</sup>

27  
28 13 **Primary Outcome (ICU phase):** The primary outcome is the change in RF CSA, mT, and EI measured  
29  
30 14 by MSKUS at baseline, assessed within 48 hours of CRRT initiation, to ICU days 3 and 7 of study  
31  
32 15 enrollment (or at ICU discharge, if sooner). Operational and standardization procedures have been  
33  
34 16 previously published.<sup>35 38</sup> In brief, patients are positioned supine with the lower extremity in neutral  
35  
36 17 alignment. RF ultrasound images are acquired two-thirds of the distance from the anterior superior iliac  
37  
38 18 spine to the superior border of the patella of the right lower extremity at all timepoints. Sonographers will  
39  
40 19 use a linear probe (5-15 Hz) with the same machine for all timepoints and a minimal-to-no-compression  
41  
42 20 technique. Sonographers will obtain three images per assessment to reduce variations in EI. Ultrasound  
43  
44 21 images will be assessed for CSA, mT, and EI at baseline within 48 hours of CRRT initiation, at days 3  
45  
46 22 and 7 from enrollment (or at ICU discharge, if sooner). A representative ultrasound image and the  
47  
48 23 techniques for landmarking and probe pressure are provided in **Figure 1**.

49  
50 24 **Secondary Outcomes (ICU Phase):** Patients will have blood collected at baseline (within 48 hours of  
51  
52 25 CRRT initiation), at study days 3 and 7 (or ICU discharge, if sooner). Creatinine and cystatin C will be  
53  
54 26 measured at each timepoint. Additionally, 5-mL blood samples and CRRT effluent samples at each  
55  
56  
57  
58  
59  
60

1 **Table 1.** Demographic and clinical characteristics of the cohorts being used as our historical controls for this study.

| Cohort Characteristic                                 | Control cohort for ICU phase <sup>*38</sup>                          | Control cohort #1 for recovery phase <sup>†21</sup>                                  | Control cohort #2 for recovery phase <sup>39</sup>   |
|-------------------------------------------------------|----------------------------------------------------------------------|--------------------------------------------------------------------------------------|------------------------------------------------------|
| ICU or admission type                                 | Medical 73%; cardiothoracic 27%                                      | Medical 100%                                                                         | Mixed                                                |
| Years of enrollment                                   | 2018 to 2019                                                         | 2018 to 2019                                                                         | 2018 to 2021                                         |
| N                                                     | 41*                                                                  | 12 <sup>†</sup>                                                                      | 59                                                   |
| Primary inclusion                                     | Acute respiratory failure or sepsis and anticipated ICU stay >3 days | Survivors of acute respiratory failure requiring >48 hours of mechanical ventilation | Survivors of sepsis and/or acute respiratory failure |
| Timing of initial assessment                          | Within 48 hours of admission; median 1.1 days [IQR 0.7-1.4]          | N/A                                                                                  | N/A                                                  |
| Timing of outpatient assessment                       | N/A                                                                  | 4-8 weeks after hospital discharge                                                   | 3 months after hospital discharge                    |
| Age, median years [IQR]                               | 61 [55-68]                                                           | 58 [45.5-65]                                                                         | 56 [48-64]                                           |
| Female, no. (%)                                       | 18 (44%)                                                             | 4 (33%)                                                                              | 31 (53%)                                             |
| No. (%) mechanically ventilated                       | 30 (73%)                                                             | 12 (100%)                                                                            | 43 (73%)                                             |
| Duration of mechanical ventilation, median days [IQR] | 3.4 [1-7.7]                                                          | 6.45 [2.8-11.95]                                                                     | 8 [5-14]                                             |
| No. (%) requiring RRT                                 | 5 (12%)*                                                             | NR <sup>†</sup>                                                                      | 0                                                    |
| Disease severity (SOFA) scores                        | Mean 8.1 [SD ±4.8]                                                   | Median 8 [IQR 4.5-10.25]                                                             | Median 10 [IQR 8-12]                                 |
| ICU LOS, median days [IQR]                            | 8 [4]                                                                | 7.4 [4.3-18.6]                                                                       | 10 [6-15]                                            |
| Hospital LOS, median days [IQR]                       | 11.2 [8-19]                                                          | 16.7 [9.4-28.7]                                                                      | 15 [11-22]                                           |
| Hospital mortality                                    | 12%                                                                  | N/A                                                                                  | N/A                                                  |

2 Presented here are only previously published data. The two control cohorts for the recovery phase represented in the table are only a subset of the  
 3 200 patients in our ongoing registry that will serve as the control for the recovery phase. \*Data for this entire cohort are presented as published,  
 4 including data from the 5 patients treated with RRT who will be excluded from the control group in our analysis. <sup>†</sup>Though not reported in the  
 5 published manuscript, RRT status is available for this cohort and any patients with AKI-RRT will be excluded from the control group in our  
 6 analysis. Abbreviations: ICU, intensive care unit; IQR, interquartile range; LOS, length of stay; N/A, not applicable; NR, not reported; RRT, renal  
 7 replacement therapy; SD, standard deviation; SOFA, Sequential Organ Failure Assessment.

8

1  
2  
3 1 timepoint will be sent for gas chromatography-mass spectrometry evaluating a panel of analytes including  
4  
5 2 amino acids, carbohydrates, and fatty acids. Remaining samples will be stored for future analysis, though  
6  
7 3 no genetic analysis will be conducted now or in the future.  
8

9  
10 4 Patients will be scored at the same timepoints as above using the ICU Mobility Scale, an 11-point  
11  
12 5 scale ranging from 0-10 which involves the clinician scoring the patient's maximum level of mobility in  
13  
14 6 the prior 24-hour period.<sup>40 41</sup>  
15

16 7  
17  
18 8 **Outcomes (Recovery Phase):** Survivors will participate in skeletal muscle and physical function testing  
19  
20 9 at hospital discharge and during the outpatient visit at 1-3 months post-discharge. Measurements will  
21  
22 10 include MSKUS to determine RF CSA, mT, and EI. We will also conduct an array of standardized and  
23  
24 11 validated tests including:  
25

- 26 12 • **Medical Research Council Sum-score (MRC-ss):** MRC-ss is a measure of global peripheral  
27  
28 13 muscle strength that is the current clinical standard for diagnosing ICU-acquired weakness (ICU-  
29  
30 14 AW).<sup>42</sup> Muscle strength is assessed by physical exam and rated on an ordinal scale (0-5) at six  
31  
32 15 bilateral muscle groups: shoulder abductors, elbow flexors, wrist extensors, hip flexors, knee  
33  
34 16 extensors, and ankle dorsiflexors. A score <48 is considered indicative of ICU-AW, with a score  
35  
36 17 <36 indicative of severe weakness with the inability to act against resistance.<sup>43</sup>  
37  
38 18 • **Muscle strength using hand-held dynamometry for knee extension:** Maximal isometric knee  
39  
40 19 extensor strength will be measured as peak force production and rate of force development  
41  
42 20 following previously published standardized positions (**Figure 2**).<sup>44</sup>  
43  
44 21 • **Muscle strength using hand-grip dynamometry:** Hand-grip dynamometers will be utilized to  
45  
46 22 measure maximum isometric strength of the hand and forearm muscles at previously published  
47  
48 23 standardized positions.<sup>42 43</sup> The patient will undergo three repetitions with both the right and left  
49  
50 24 hand, alternating between hands.  
51  
52  
53  
54  
55  
56  
57  
58  
59  
60

- 1
- 2
- 3
- 4 1 • **Short Physical Performance Battery (SPPB):** Physical function and physical frailty will be
- 5 2 measured using the SPPB, a performance-based composite test with a total of 12 points including
- 6 3 components of balance (side-by-side stand, semi-tandem stand, and full-tandem stand), chair-to-
- 7 4 stand test, and 4-meter habitual gait speed.<sup>45 46</sup>
- 8
- 9
- 10
- 11
- 12 5 • **Timed Up and Go (TUG) Test:** The TUG assesses the time (in seconds) for a subject to stand on
- 13 6 command from a seated position, walk 3 meters, turn around, walk back to the chair, and sit
- 14 7 down. The purpose of TUG is to assess mobility, physical function, and fall risk. TUG has been
- 15 8 validated in and recommended for patients with critical illness.<sup>47-49</sup>
- 16
- 17
- 18
- 19
- 20 9 • **Six-minute walk test (6-MWT):** The 6-MWT assesses the distance a subject can walk in six
- 21 10 minutes, providing a global representation of physical function and cardiopulmonary endurance.<sup>50</sup>
- 22 11 <sup>51</sup> Meta-analysis provides benchmark data for survivors of critical illness.<sup>52</sup>
- 23
- 24
- 25
- 26
- 27 12 • **Quality of Life testing using EuroQol Group 5-dimension 5-level (EQ-5D-5L)**
- 28 13 **questionnaire:** The EQ-5D is a standardized measure of health status developed by the Euro-Qol
- 29 14 Group to provide an assessment of health for clinical and economic appraisal.<sup>53</sup> It consists of two
- 30 15 sections: the descriptive system and the visual analogue scale (EQ VAS). The descriptive system
- 31 16 assesses five dimensions: mobility, self-care, usual activities, pain/discomfort, and
- 32 17 anxiety/depression. The EQ VAS records the respondent's self-rated health on a 20-cm vertical
- 33 18 visual analogue scale with endpoints labeled the "best health you can imagine" and the "worse
- 34 19 health you can imagine." This information can be used as a quantitative measure of health as
- 35 20 judged by individual respondents.<sup>51 54 55</sup>
- 36
- 37
- 38
- 39
- 40
- 41
- 42 21 • **Clinical Frailty Scale (CFS):** The CFS is designed for clinical use and has been widely adopted
- 43 22 as a judgement-based tool to screen for frailty and to broadly stratify degrees of fitness and
- 44 23 frailty.<sup>56 57</sup> It is not a questionnaire, but a way to summarize information from a clinical encounter
- 45 24 to roughly quantify an individual's overall health status. While CFS has traditionally been used
- 46
- 47
- 48
- 49
- 50
- 51
- 52
- 53
- 54
- 55
- 56
- 57
- 58
- 59
- 60

1 specifically in older patients, recent data have demonstrated its utility in an ICU population  
2 demographically similar to our target population.<sup>58</sup>

- 3 • **Functional Assessment of Chronic Illness Therapy Fatigue (FACIT-F) Questionnaire:** The  
4 FACIT-F scale is a 13-item measure that assesses self-reported fatigue and its impact upon daily  
5 activities and function.<sup>59 60</sup>
- 6 • **36-Item Short Form Health Survey Physical Function Scale (SF-36 Physical Function):** The  
7 SF-36 is a 36-item patient-reported survey of health commonly used to evaluate adult patients  
8 which contains 8 domains, including a physical function scale based on 10 of the 36 items which  
9 has been shown to have high reliability.<sup>61</sup>
- 10 • **Additional Events:** Finally, we will document the occurrence of the following events: return to  
11 driving, return to work or hobby, hospital readmission, and need for emergency department care.

12 **Assessor Training:** This multisite study is an interdisciplinary collaboration with expertise in critical  
13 care, nephrology, muscle biology, and physical function. Physical therapist-scientists and exercise  
14 physiologists with established expertise in MSKUS and functional testing serve as coinvestigators at each  
15 site. Three two-hour sessions of teleconference training will be performed to promote standardization of  
16 ultrasound and outcome assessments. In addition, novice sonographers were instructed to perform and  
17 practice a minimum of 10 acquisitions of RF muscle images from healthy individuals before study  
18 initiation. To better establish inter-rater reliability of image acquisition, the first 5 patients at each site will  
19 have ultrasound studies conducted by two team members. The first sonographer will obtain images and  
20 leave the room, and the second will enter and repeat the test. After a 10-minute wash-out period, the team  
21 members will sequentially repeat the ultrasound measurements, which will allow us to establish both  
22 inter- and intra-observer variability. Finally, images will be blinded, coded (rater 1 or rater 2; site  
23 location) and sent securely to the University of Kentucky to be reviewed by an expert sonographer (KPM,  
24 who has > 6 years of MSKUS experience) to ensure cross-site standardization of measurements.<sup>35</sup> All  
25 images will be analyzed for muscle CSA, mT, and EI by the same blinded expert sonographer. The  
26 images from the first 5 patients obtained by the two sonographers at each site will be examined with intra-

1 class correlation coefficient (ICC). Sites with ICC <0.7 will receive additional training to improve  
 2 reliability at each site. ICC values will be disseminated with our final results.

3 **Participant Timeline:** Patients enrolled in the study will participate in up to two phases, an ICU phase  
 4 and – for those who survive their critical illness – a recovery phase. The schedule of assessments for both  
 5 phases is delineated in **Table 2**.

6  
 7 **Table 2.** Planned evaluations at each study timepoint.

| Parameter                | Timepoint                     |                            |                                |                    |                       |
|--------------------------|-------------------------------|----------------------------|--------------------------------|--------------------|-----------------------|
|                          | ICU Phase                     |                            |                                | Recovery Phase     |                       |
|                          | Within 48 hours of CRRT start | 3 ± 1 days from enrollment | Study day 7 (or ICU discharge) | Hospital Discharge | Outpatient 1-3 months |
| Rectus Femoris US        | X                             | X                          | X                              | X                  | X                     |
| Amino Acids (Blood)      | X                             | X                          | X                              |                    |                       |
| Amino Acids (Effluent)   | X                             | X                          | X                              |                    |                       |
| Cystatin C               | X                             | X                          | X                              |                    |                       |
| ICU Mobility Scale       | X                             | X                          | X                              |                    |                       |
| Muscle Strength - MRC-ss |                               |                            |                                | X                  | X                     |
| Muscle Strength - HGD    |                               |                            |                                | X                  | X                     |
| Muscle Strength - HHD    |                               |                            |                                | X                  | X                     |
| SPPB                     |                               |                            |                                | X                  | X                     |
| TUG test                 |                               |                            |                                |                    | X                     |
| 6-MWT                    |                               |                            |                                |                    | X                     |
| EQ-5D-5L                 |                               |                            |                                |                    | X                     |
| Clinical Frailty Scale   |                               |                            |                                |                    | X                     |
| FACIT-fatigue            |                               |                            |                                |                    | X                     |
| SF-36 Physical Function  |                               |                            |                                |                    | X                     |
| Return to driving        |                               |                            |                                |                    | X                     |
| Return to work or hobby  |                               |                            |                                |                    | X                     |
| Readmission              |                               |                            |                                |                    | X                     |
| ED visit                 |                               |                            |                                |                    | X                     |

8 Abbreviations: 6-MWT, six-minute walk test; ED, emergency department; EQ-5D-5L, EuroQol Group 5-  
 9 dimension 5-level version; FACIT-F, Functional Assessment of Chronic Illness Therapy-Fatigue; HGD,  
 10 hand-grip dynamometry; HHD, hand-held dynamometry; ICU, intensive care unit; MRC-ss, Medical  
 11 Research Council sum-score; SF-36, 36-Item Short Form Health Survey; SPPB, Short Physical  
 12 Performance Battery; TUG, Timed Up and Go; US, ultrasound.

1  
2  
3 1 **Sample Size:** Our previous study reported a decrease in muscle RF CSA at ICU day 7 of 18.5%.<sup>38</sup> To  
4  
5 2 detect an absolute difference in percent decrease in muscle size of 6% at 7 days (24.5% change at 7 days  
6  
7 3 in AKI-RRT group vs. 18.5% change in controls), 61 patients per group are needed assuming an alpha of  
8  
9 4 0.05 and a power of 80%. This will require inclusion of 20 AKI-RRT patients per site that provide all  
10  
11 5 ICU datapoints. Our previous study also reported that RF CSA was  $2.47 \pm 0.88$  cm<sup>2</sup> at ICU day 7, down  
12  
13 6 from a baseline on ICU day 1 of 2.99 cm<sup>2</sup>.<sup>38</sup> To detect a full return to baseline in the outpatient setting  
14  
15 7 with an alpha of 0.05 and a power of 80%, 22 patients are required in each group. To detect a 75%  
16  
17 8 recovery to baseline from day 7 values, 40 patients are required. We anticipate a 40-50% in-hospital  
18  
19 9 mortality rate which would leave 31 to 37 patients alive at discharge. Assuming 22 patients are needed,  
20  
21 10 this provides room for attrition or loss to follow-up of 30-40%.

22  
23  
24 11 **Recruitment:** Patients will be recruited in the multidisciplinary adult ICUs of the three sites involved in  
25  
26 12 the study. Patients will be identified through communication with the nephrology consult services at each  
27  
28 13 site, who will independently make decisions regarding indications for and timing of initiation of RRT.  
29  
30 14 The enrollment will occur for a full year following institutional review board (IRB) approval at each site,  
31  
32 15 with the funding dates ranging from August 1, 2022, to July 31, 2023, at the University of Kentucky and  
33  
34 16 University of Iowa and from October 1, 2022, to September 30, 2023, at the University of New Mexico.  
35  
36 17 To promote subject retention after discharge, we will allow for a two-month window in which to schedule  
37  
38 18 the post-discharge follow-up visit and subjects will be contacted by telephone a minimum of 3 times  
39  
40 19 before being considered lost to follow-up. As stipulated in the informed consent form, though subjects  
41  
42 20 may withdraw from the study at any point, all data collected prior to withdrawal will be retained for  
43  
44 21 analysis.

45  
46  
47 22 **Patient and Public Involvement:** No formal patient advisory committee was established and there was  
48  
49 23 no patient or public involvement in the design or planning of the study. However, to inform future study  
50  
51 24 design, we will conduct a brief open-ended post-study survey following the outpatient visit at 1-3 months  
52  
53 25 to help discern which of the patient-reported outcome measures and functional assessments performed  
54  
55 26 appear most valuable to the study subjects (**Supplementary material 1**).

1  
2  
3 1  
45 2 **Methods: Data collection, management, and analysis**

6  
7 3 **Data Collection Methods:** Ultrasound images will be transferred through secure link to the data  
8  
9 4 coordinating site (University of Kentucky). One expert sonographer with clinical and research experience  
10  
11 5 (KPM) will analyze the images for CSA, mT, and EI. All muscle analyses will be performed blinded with  
12  
13 6 all images coded by a different research coordinator. The blinded assessor will be unaware of the patient  
14  
15 7 identification, the investigator obtaining the images, or the timepoint of the MSKUS. Blood and effluent  
16  
17 8 fluid will be collected at the defined timepoints. Plasma samples will be collected in EDTA tubes,  
18  
19 9 centrifuged at 1,000 g for 10 minutes at 4 °C. Following extraction of supernatant and transfer into  
20  
21 10 storage tubes, samples will be stored at -80 °C. The specimens will be shipped to the biospecimen site  
22  
23 11 (University of Iowa) where we will perform the metabolomic analysis on all samples in one batch. Patient  
24  
25 12 data including demographics, data related to acute illness and comorbidity, and test results will be  
26  
27 13 recorded using standardized case report forms and then uploaded to REDCap.

28  
29 14 **Data Management:** Data will be stored using REDCap software at each site. REDCap is a secure web  
30  
31 15 application for building and managing online databases.<sup>62</sup> REDCap is HIPAA compliant and is  
32  
33 16 specifically geared to support online and offline data capture for research studies and operations.

34  
35 17 **Statistical Methods:** We will summarize descriptive statistics at each timepoint using frequencies and  
36  
37 18 proportions for categorical variables and means and standard deviations or medians and interquartile  
38  
39 19 ranges, as appropriate, for continuous variables. Binary outcome variables include the diagnosis of ICU-  
40  
41 20 acquired weakness (defined as MRC-ss <48/60) and the additional recovery phase events (i.e., return to  
42  
43 21 driving, return to work or hobby, hospital readmission, and need for emergency department care).  
44  
45 22 Continuous variables include MSKUS parameters, strength testing, and physical function testing. Ordinal  
46  
47 23 variables include scores on the EQ-5D-5L, FACIT-F sub-question, and CFS.

- 48  
49  
50  
51 24 • **ICU Phase:** The primary outcome in the ICU phase of the study, corresponding to Aim 1, will be  
52  
53 25 the change in RF CSA, mT, and EI from baseline to day 7 (or ICU discharge) within AKI-RRT  
54  
55 26 patients and in comparison to historical ICU controls without AKI-RRT. Repeated measures

56  
57  
58 14



1  
2  
3 1 analysis will be used with muscle parameters as fixed effects. Of note, in the cohort to be used as  
4  
5 2 the historical control for the ICU phase, MSKUS was performed on ICU days 1, 3, 5, and 7 and  
6  
7 3 muscle strength assessment (by MRC-ss, hand-held dynamometry, and hand-grip dynamometry)  
8  
9 4 was performed at ICU and hospital discharge.<sup>38</sup> For AKI-RRT patients, time 0 is study enrollment  
10  
11 5 (which must be within 48 hours of CRRT initiation). To account for the resulting differences in  
12  
13 6 timing of assessments, time from ICU admission to MSKUS and muscle strength assessments  
14  
15 7 will be included as covariables in our analyses. We will develop multivariable models for within-  
16  
17 8 group comparisons (in AKI-RRT cases) and between-group comparisons (AKI-RRT cases vs.  
18  
19 9 controls). Additional variables entered in the analyses will include demographic variables  
20  
21 10 including age and sex, Charlson comorbidity score, illness severity as measured by sequential  
22  
23 11 organ failure assessment (SOFA) score<sup>63</sup>, and ICU variables (including mechanical ventilation,  
24  
25 12 trauma, sepsis, corticosteroid use, use of paralytic agents, and ICU type). We will conduct  
26  
27 13 univariable analysis to determine if any of these variables are significantly associated with the  
28  
29 14 primary outcomes. To avoid overfitting, only significant variables will be added in the subsequent  
30  
31 15 adjusted model. We will use paired t-test to examine within-group differences and Analysis of  
32  
33 16 Variance (ANOVA) for between-group differences of MSKUS parameters and other continuous  
34  
35 17 measures. Binary outcomes will be compared by chi-square test. Bonferroni adjustment will be  
36  
37 18 utilized for multiple comparisons.

- 39 19 • **Recovery Phase:** The primary outcomes in the recovery phase of the study, corresponding to  
40  
41 20 Aim 2, will include both (1) the detailed characterization of longitudinal changes in muscle mass  
42  
43 21 and quality and functional status in AKI-RRT survivors, including comparison of post-discharge  
44  
45 22 recovery of RF size and quality assessed by MSKUS and of muscle strength in AKI-RRT  
46  
47 23 survivors as measured within 1-3 months of discharge compared to in-hospital baselines, and (2)  
48  
49 24 comparison of MSKUS parameters and of muscle strength assessed at 1-3 months after discharge  
50  
51 25 in AKI-RRT survivors with the same parameters in historical controls of ICU survivors without  
52  
53 26 AKI-RRT. The assessments of muscle strength at this phase will include MRC-ss, hand-held  
54  
55  
56  
57  
58  
59  
60

1 dynamometry for knee extension, and hand-grip dynamometry. Using the same methods and  
2  
3 covariables as outlined for the ICU phase analysis, we will generate multivariable models for  
4  
5 within-group and between-group comparisons of MSKUS parameters and muscle strength, with  
6  
7 the exception that lengths of ICU and hospital stay and time from hospital discharge to outpatient  
8  
9 assessment will be included as covariables in this phase. For the SPPB, TUG, 6-MWT, EQ-5D-  
10  
11 5L, CFS, FACIT-F, SF-36, and additional recovery phase events, differences between the AKI-  
12  
13 RRT survivors and the historical ICU survivor controls without AKI-RRT will be compared  
14  
15 using t-test, Wilcoxon rank sum test, Mann-Whitney U test, and chi-square test, as appropriate.  
16  
17  
18  
19  
20 • **Metabolomic analysis:** The metabolomic analysis will have no control group. The primary  
21  
22 outcome of the metabolomic analysis, corresponding to Aim 3, will be the correlation between  
23  
24 changes in plasma and effluent amino acid levels measured during CRRT treatment in the ICU  
25  
26 phase and both the MSKUS parameters obtained throughout the study and muscle strength  
27  
28 measured in AKI-RRT survivors at hospital discharge and 1-3 months post-discharge. The  
29  
30 primary analysis will be performed using a mixed effects model with ANOVA using Sidak's  
31  
32 multiple comparison test for paired samples to compare baseline to subsequent samples.  
33  
34 Correlations with muscle changes based on MSKUS measurements at days 3 and 7 and  
35  
36 correlations with muscle mass, strength, and function at hospital discharge and at 1-3 months will  
37  
38 be assessed with Pearson correlation test for continuous variables and Spearman Rho test for non-  
39  
40 parametric data.  
41  
42  
43  
44

## 45 **Ethics and Dissemination**

46  
47 **Research Ethics Approval:** This protocol was approved by the University of Kentucky Office of  
48  
49 Research Integrity Medical IRB, which serves as the single IRB for this multisite study according to  
50  
51 National Institutes of Health single IRB Policy<sup>64</sup> (IRB #71153; initial approval June 7, 2022; protocol  
52  
53 version 2 dated November 27, 2022, approved January 7, 2023). Any further significant protocol  
54  
55 revisions will be communicated to the IRB and *BMJ Open* and updated on the clinicaltrials.gov registry.  
56  
57

1  
2  
3 1 **Consent:** Given the expectation that most AKI-RRT patients will be mechanically ventilated, consent  
4  
5 2 will be obtained prior to enrollment from a legally authorized representative if necessary. Consent will be  
6  
7 3 obtained by the local research team, which may include the site principal investigator, coinvestigators, or  
8  
9 4 research assistants. Patients will be identified based on discussion with nephrology consult teams  
10  
11 5 regarding patients about to be initiated on CRRT. The patient or the patient's legally authorized  
12  
13 6 representative will undergo detailed consent and will be given a copy of the signed consent form

14  
15  
16 7 **(Supplementary material 2).**

17  
18 8 **Confidentiality:** Confidentiality of the data obtained from enrolled participants will be achieved by  
19  
20 9 storing the data using REDCap data management to reduce the risk of accidental loss of confidentiality.  
21  
22 10 Each patient will be assigned a unique research ID, which will be used to identify the REDCap record and  
23  
24 11 the biospecimens in storage for each patient. Once all data are collected, the records will be de-identified  
25  
26 12 by removing any identifying information including medical record numbers, names, and dates of birth and  
27  
28 13 hospital admission.

29  
30 14 **Data Access:** The final de-identified dataset will be made fully accessible upon reasonable request once  
31  
32 15 the results are published.

33  
34 16 **Dissemination Policy:** We intend to disseminate results to participants, healthcare professionals, the  
35  
36 17 public, and other relevant groups via conference presentation and publication and without any publication  
37  
38 18 restrictions. The final manuscript will be drafted by the primary investigators. We plan to grant public  
39  
40 19 access to the full protocol, data collection forms, participant-level dataset, and statistical code upon  
41  
42 20 reasonable request.

43  
44  
45 21

46  
47 22

1  
2  
3 **1 Author Contributions:**  
4

5 2 The study was conceptualized by JPT, BRG, JAN, and KPM. The methodology was developed and  
6  
7 3 revised by JPT, BRG, CAP, FGS, NJ, BMJ, YY, NG, HPI, LG, JAN, and KPM. Resources for  
8  
9 4 developing and carrying out the protocol were provided by JPT, BRG, CAP, FGS, NJ, BMJ, YY, NG,  
10  
11 5 HPI, JAN, and KPM. JPT, BRG, JAN, and KPM wrote the original draft manuscript. Funding for the  
12  
13 6 study was obtained by JPT, BRG, NJ, BMJ, YY, JAN, and KPM. All authors reviewed and edited this  
14  
15 7 final draft. This manuscript and all subsequent publications stemming from this trial protocol will adhere  
16  
17 8 to the authorship eligibility guidelines of the International Committee of Medical Journal Editors  
18  
19 9 (ICMJE) and will not involve professional writers.  
20  
21  
22  
23

24 **11 Funding:** This work is supported by a Clinical and Translational Award (CTSA) Inter-Institutional Pilot  
25  
26 12 Project Award (U24TR002260 from the National Institutes of Health (NIH) National Center for  
27  
28 13 Advancing Translational Sciences (NCATS). The funder of the study had no role in study design and will  
29  
30 14 have no role in the collection, management, analysis, and interpretation of data; writing of the final study  
31  
32 15 report; and the decision to submit the report for publication. JAN is supported by grants from the NIH  
33  
34 16 National Institute of Diabetes and Digestive and Kidney Diseases (NIDDK), including R01DK128208,  
35  
36 17 U01DK12998, and P30DK079337. KPM is supported by the NIH National Institute of Arthritis and  
37  
38 18 Musculoskeletal and Skin Disease under award number K23-AR079583.  
39  
40  
41  
42

43 **20 Declaration of Interests:** The authors have no conflicts of interest to declare.  
44  
45  
46  
47  
48  
49  
50  
51  
52  
53  
54  
55  
56  
57

## 1 References:

- 2 1. Hoste EA, Bagshaw SM, Bellomo R, et al. Epidemiology of acute kidney injury in critically ill patients:  
3 the multinational AKI-EPI study. *Intensive Care Med* 2015;41(8):1411-23. doi: 10.1007/s00134-  
4 015-3934-7 [published Online First: 2015/07/15]
- 5 2. Cerda J, Liu KD, Cruz DN, et al. Promoting Kidney Function Recovery in Patients with AKI Requiring  
6 RRT. *Clin J Am Soc Nephrol* 2015;10(10):1859-67. doi: 10.2215/CJN.01170215 [published Online  
7 First: 20150702]
- 8 3. Group KDIGOKAKIW. KDIGO Clinical Practice Guideline for Acute Kidney Injury. *Kidney Int Suppl*  
9 2012;2(1):2-138.
- 10 4. Sparrow HG, Swan JT, Moore LW, et al. Disparate outcomes observed within Kidney Disease:  
11 Improving Global Outcomes (KDIGO) acute kidney injury stage 1. *Kidney Int* 2019;95(4):905-13.  
12 doi: 10.1016/j.kint.2018.11.030 [published Online First: 2019/03/02]
- 13 5. Cho KC, Himmelfarb J, Paganini E, et al. Survival by dialysis modality in critically ill patients with acute  
14 kidney injury. *Journal of the American Society of Nephrology : JASN* 2006;17(11):3132-8. doi:  
15 10.1681/asn.2006030268 [published Online First: 2006/10/06]
- 16 6. Gameiro J, Marques F, Lopes JA. Long-term consequences of acute kidney injury: a narrative review.  
17 *Clin Kidney J* 2021;14(3):789-804. doi: 10.1093/ckj/sfaa177 [published Online First: 20201119]
- 18 7. Mehta RL, Bouchard J, Soroko SB, et al. Sepsis as a cause and consequence of acute kidney injury:  
19 Program to Improve Care in Acute Renal Disease. *Intensive Care Med* 2011;37(2):241-8. doi:  
20 10.1007/s00134-010-2089-9 [published Online First: 2010/12/15]
- 21 8. Griffin BR, Teixeira JP, Ambruso S, et al. Stage 1 acute kidney injury is independently associated with  
22 infection following cardiac surgery. *J Thorac Cardiovasc Surg* 2021;161(4):1346-55 e3. doi:  
23 10.1016/j.jtcvs.2019.11.004 [published Online First: 2020/02/03]
- 24 9. Formeck CL, Joyce EL, Fuhrman DY, et al. Association of Acute Kidney Injury With Subsequent Sepsis in  
25 Critically Ill Children. *Pediatr Crit Care Med* 2021;22(1):e58-e66. doi:  
26 10.1097/PCC.0000000000002541
- 27 10. Formeck CL, Feldman R, Althouse AD, et al. Risk and Timing of De Novo Sepsis in Critically Ill Children  
28 Following Acute Kidney Injury. *Kidney360* 2023;10.34067/KID.0005082022. doi:  
29 10.34067/kid.0005082022
- 30 11. Wang WJ, Chao CT, Huang YC, et al. The impact of acute kidney injury with temporary dialysis on the  
31 risk of fracture. *J Bone Miner Res* 2014;29(3):676-84. doi: 10.1002/jbmr.2061 [published Online  
32 First: 2013/08/10]
- 33 12. Wu VC, Wu PC, Wu CH, et al. The impact of acute kidney injury on the long-term risk of stroke. *J Am*  
34 *Heart Assoc* 2014;3(4) doi: 10.1161/JAHA.114.000933 [published Online First: 2014/07/17]
- 35 13. Wu PC, Wu CJ, Lin CJ, et al. Long-term risk of upper gastrointestinal hemorrhage after advanced AKI.  
36 *Clin J Am Soc Nephrol* 2015;10(3):353-62. doi: 10.2215/CJN.01240214 [published Online First:  
37 2014/12/21]
- 38 14. Guerra C, Linde-Zwirble WT, Wunsch H. Risk factors for dementia after critical illness in elderly  
39 Medicare beneficiaries. *Critical care (London, England)* 2012;16(6):R233. doi: 10.1186/cc11901  
40 [published Online First: 2012/12/19]
- 41 15. Teixeira JP, Mayer KP, Griffin BR, et al. Intensive Care Unit-Acquired Weakness in Patients With  
42 Acute Kidney Injury: A Contemporary Review. *Am J Kidney Dis* 2022 doi:  
43 10.1053/j.ajkd.2022.08.028 [published Online First: 20221101]
- 44 16. Wang XH, Mitch WE, Price SR. Pathophysiological mechanisms leading to muscle loss in chronic  
45 kidney disease. *Nat Rev Nephrol* 2022;18(3):138-52. doi: 10.1038/s41581-021-00498-0  
46 [published Online First: 20211108]

- 1 17. Kress JP, Hall JB. ICU-acquired weakness and recovery from critical illness. *N Engl J Med*  
2 2014;370(17):1626-35. doi: 10.1056/NEJMra1209390
- 3 18. Latronico N, Herridge M, Hopkins RO, et al. The ICM research agenda on intensive care unit-acquired  
4 weakness. *Intensive Care Med* 2017 doi: 10.1007/s00134-017-4757-5 [published Online First:  
5 2017/03/16]
- 6 19. Hermans G, Van den Berghe G. Clinical review: intensive care unit acquired weakness. *Critical care*  
7 *(London, England)* 2015;19:274. doi: 10.1186/s13054-015-0993-7 [published Online First:  
8 2015/08/06]
- 9 20. Koukourikos K, Tsaloglidou A, Kourkouta L. Muscle atrophy in intensive care unit patients. *Acta*  
10 *Inform Med* 2014;22(6):406-10. doi: 10.5455/aim.2014.22.406-410 [published Online First:  
11 2015/02/17]
- 12 21. Mayer KP, Welle MM, Evans CG, et al. Muscle Power is Related to Physical Function in Patients  
13 Surviving Acute Respiratory Failure: A Prospective Observational Study. *Am J Med Sci* 2020 doi:  
14 10.1016/j.amjms.2020.09.018 [published Online First: 2020/11/16]
- 15 22. Fiaccadori E, Regolisti G, Cabassi A. Specific nutritional problems in acute kidney injury, treated with  
16 non-dialysis and dialytic modalities. *NDT Plus* 2010;3(1):1-7. doi: 10.1093/ndtplus/sfp017  
17 [published Online First: 2010/02/01]
- 18 23. Berg A, Norberg A, Martling CR, et al. Glutamine kinetics during intravenous glutamine  
19 supplementation in ICU patients on continuous renal replacement therapy. *Intensive Care Med*  
20 2007;33(4):660-6. doi: 10.1007/s00134-007-0547-9 [published Online First: 2007/02/24]
- 21 24. Druml W, Fischer M, Liebisch B, et al. Elimination of amino acids in renal failure. *Am J Clin Nutr*  
22 1994;60(3):418-23. doi: 10.1093/ajcn/60.3.418 [published Online First: 1994/09/01]
- 23 25. Druml W. Nutritional management of acute renal failure. *Am J Kidney Dis* 2001;37(1 Suppl 2):S89-94.  
24 doi: 10.1053/ajkd.2001.20757 [published Online First: 2001/02/13]
- 25 26. Oh WC, Mafrici B, Rigby M, et al. Micronutrient and Amino Acid Losses During Renal Replacement  
26 Therapy for Acute Kidney Injury. *Kidney Int Rep* 2019;4(8):1094-108. doi:  
27 10.1016/j.ekir.2019.05.001 [published Online First: 2019/08/24]
- 28 27. Ostermann M, Summers J, Lei K, et al. Micronutrients in critically ill patients with severe acute kidney  
29 injury - a prospective study. *Sci Rep* 2020;10(1):1505. doi: 10.1038/s41598-020-58115-2  
30 [published Online First: 2020/02/01]
- 31 28. Hermans G, De Jonghe B, Bruyninckx F, et al. Clinical review: Critical illness polyneuropathy and  
32 myopathy. *Critical care (London, England)* 2008;12(6):238. doi: 10.1186/cc7100 [published  
33 Online First: 20081125]
- 34 29. Lambell KJ, Tierney AC, Wang JC, et al. Comparison of Ultrasound-Derived Muscle Thickness With  
35 Computed Tomography Muscle Cross-Sectional Area on Admission to the Intensive Care Unit: A  
36 Pilot Cross-Sectional Study. *JPEN Journal of parenteral and enteral nutrition* 2021;45(1):136-45.  
37 doi: 10.1002/jpen.1822 [published Online First: 20200415]
- 38 30. Looijaard W, Molinger J, Weijs PJM. Measuring and monitoring lean body mass in critical illness. *Curr*  
39 *Opin Crit Care* 2018;24(4):241-47. doi: 10.1097/mcc.0000000000000511 [published Online First:  
40 2018/05/31]
- 41 31. Parry SM, El-Ansary D, Cartwright MS, et al. Ultrasonography in the intensive care setting can be  
42 used to detect changes in the quality and quantity of muscle and is related to muscle strength  
43 and function. *Journal of critical care* 2015;30(5):1151.e9-14. doi: 10.1016/j.jcrc.2015.05.024  
44 [published Online First: 2015/07/28]
- 45 32. Sarwal A, Parry SM, Berry MJ, et al. Interobserver Reliability of Quantitative Muscle Sonographic  
46 Analysis in the Critically Ill Population. *Journal of ultrasound in medicine : official journal of the*  
47 *American Institute of Ultrasound in Medicine* 2015;34(7):1191-200. doi: 10.7863/ultra.34.7.1191  
48 [published Online First: 2015/06/27]

- 1  
2  
3 1 33. Strasser EM, Draskovits T, Praschak M, et al. Association between ultrasound measurements of  
4 2 muscle thickness, pennation angle, echogenicity and skeletal muscle strength in the elderly. *Age*  
5 3 (*Dordrecht, Netherlands*) 2013;35(6):2377-88. doi: 10.1007/s11357-013-9517-z [published  
6 4 Online First: 2013/03/05]
- 8 5 34. Zaidman CM, Wu JS, Wilder S, et al. Minimal training is required to reliably perform quantitative  
9 6 ultrasound of muscle. *Muscle & nerve* 2014;50(1):124-28. doi: 10.1002/mus.24117
- 10 7 35. Mayer KP, Dhar S, Cassity E, et al. Interrater Reliability of Muscle Ultrasonography Image Acquisition  
11 8 by Physical Therapists in Patients Who Have or Who Survived Critical Illness. *Phys Ther*  
12 9 2020;100(9):1701-11. doi: 10.1093/ptj/pzaa068
- 13 10 36. Sabatino A, Regolisti G, Bozzoli L, et al. Reliability of bedside ultrasound for measurement of  
14 11 quadriceps muscle thickness in critically ill patients with acute kidney injury. *Clinical nutrition*  
15 12 (*Edinburgh, Scotland*) 2016 doi: 10.1016/j.clnu.2016.09.029 [published Online First: 2016/10/17]
- 16 13 37. Inker LA, Eneanya ND, Coresh J, et al. New Creatinine- and Cystatin C-Based Equations to Estimate  
17 14 GFR without Race. *N Engl J Med* 2021;385(19):1737-49. doi: 10.1056/NEJMoa2102953  
18 15 [published Online First: 20210923]
- 20 16 38. Mayer KP, Thompson Bastin ML, Montgomery-Yates AA, et al. Acute skeletal muscle wasting and  
21 17 dysfunction predict physical disability at hospital discharge in patients with critical illness.  
22 18 *Critical care (London, England)* 2020;24(1):637. doi: 10.1186/s13054-020-03355-x [published  
23 19 Online First: 20201104]
- 24 20 39. Mayer KP, Ortiz-Soriano VM, Kalantar A, et al. Acute kidney injury contributes to worse physical and  
25 21 quality of life outcomes in survivors of critical illness. *BMC Nephrol* 2022;23(1):137. doi:  
26 22 10.1186/s12882-022-02749-z [published Online First: 20220407]
- 28 23 40. Hodgson C, Needham D, Haines K, et al. Feasibility and inter-rater reliability of the ICU Mobility  
29 24 Scale. *Heart Lung* 2014;43(1):19-24. doi: 10.1016/j.hrtlng.2013.11.003 [published Online First:  
30 25 20131119]
- 31 26 41. Tipping CJ, Bailey MJ, Bellomo R, et al. The ICU Mobility Scale Has Construct and Predictive Validity  
32 27 and Is Responsive. A Multicenter Observational Study. *Ann Am Thorac Soc* 2016;13(6):887-93.  
33 28 doi: 10.1513/AnnalsATS.201510-717OC
- 34 29 42. Hermans G, Clerckx B, Vanhullebusch T, et al. Interobserver agreement of Medical Research Council  
35 30 sum-score and handgrip strength in the intensive care unit. *Muscle & nerve* 2012;45(1):18-25.  
36 31 doi: 10.1002/mus.22219 [published Online First: 2011/12/23]
- 38 32 43. Parry SM, Berney S, Granger CL, et al. A new two-tier strength assessment approach to the diagnosis  
39 33 of weakness in intensive care: an observational study. *Critical care (London, England)*  
40 34 2015;19(1):52. doi: 10.1186/s13054-015-0780-5 [published Online First: 20150226]
- 41 35 44. Vanpee G, Segers J, Van Mechelen H, et al. The interobserver agreement of handheld dynamometry  
42 36 for muscle strength assessment in critically ill patients. *Crit Care Med* 2011;39(8):1929-34. doi:  
43 37 10.1097/CCM.0b013e31821f050b
- 44 38 45. Bakhru RN, Davidson JF, Bookstaver RE, et al. Physical function impairment in survivors of critical  
45 39 illness in an ICU Recovery Clinic. *Journal of critical care* 2018;45:163-69. doi:  
46 40 10.1016/j.jcrc.2018.02.001 [published Online First: 20180203]
- 48 41 46. Parry SM, Denehy L, Beach LJ, et al. Functional outcomes in ICU - what should we be using? - an  
49 42 observational study. *Critical care (London, England)* 2015;19(1):127. doi: 10.1186/s13054-015-  
50 43 0829-5 [published Online First: 20150329]
- 51 44 47. Elliott D, Denehy L, Berney S, et al. Assessing physical function and activity for survivors of a critical  
52 45 illness: a review of instruments. *Aust Crit Care* 2011;24(3):155-66. doi:  
53 46 10.1016/j.aucc.2011.05.002 [published Online First: 20110701]

- 1  
2  
3 1 48. Denehy L, Nordon-Craft A, Edbrooke L, et al. Outcome measures report different aspects of patient  
4 2 function three months following critical care. *Intensive Care Med* 2014;40(12):1862-9. doi:  
5 3 10.1007/s00134-014-3513-3 [published Online First: 20141016]  
6 4  
7 49. Connolly B. Describing and measuring recovery and rehabilitation after critical illness. *Curr Opin Crit*  
8 5 *Care* 2015;21(5):445-52. doi: 10.1097/MCC.0000000000000233  
9 6  
10 50. Laboratories ATSCoPSfCPF. ATS statement: guidelines for the six-minute walk test. *Am J Respir Crit*  
11 7 *Care Med* 2002;166(1):111-7. doi: 10.1164/ajrccm.166.1.at1102  
12 8  
13 51. Needham DM, Sepulveda KA, Dinglas VD, et al. Core Outcome Measures for Clinical Research in  
14 9 Acute Respiratory Failure Survivors. An International Modified Delphi Consensus Study. *Am J*  
15 10 *Respir Crit Care Med* 2017;196(9):1122-30. doi: 10.1164/rccm.201702-0372OC  
16 11  
17 52. Parry SM, Nalamalapu SR, Nunna K, et al. Six-Minute Walk Distance After Critical Illness: A  
18 12 Systematic Review and Meta-Analysis. *J Intensive Care Med* 2021;36(3):343-51. doi:  
19 13 10.1177/0885066619885838 [published Online First: 20191105]  
20 14  
21 53. Herdman M, Gudex C, Lloyd A, et al. Development and preliminary testing of the new five-level  
22 15 version of EQ-5D (EQ-5D-5L). *Qual Life Res* 2011;20(10):1727-36. doi: 10.1007/s11136-011-  
23 16 9903-x [published Online First: 20110409]  
24 17  
25 54. Cuthbertson BH, Roughton S, Jenkinson D, et al. Quality of life in the five years after intensive care: a  
26 18 cohort study. *Critical care (London, England)* 2010;14(1):R6. doi: 10.1186/cc8848 [published  
27 19 Online First: 20100120]  
28 20  
29 55. Ferrao C, Quintaneiro C, Camila C, et al. Evaluation of long-term outcomes of very old patients  
30 21 admitted to intensive care: Survival, functional status, quality of life, and quality-adjusted life-  
31 22 years. *Journal of critical care* 2015;30(5):1150 e7-11. doi: 10.1016/j.jcrc.2015.05.005 [published  
32 23 Online First: 20150519]  
33 24  
34 56. Brummel NE, Bell SP, Girard TD, et al. Frailty and Subsequent Disability and Mortality among Patients  
35 25 with Critical Illness. *Am J Respir Crit Care Med* 2017;196(1):64-72. doi: 10.1164/rccm.201605-  
36 26 0939OC  
37 27  
38 57. Darvall JN, Greentree K, Braat MS, et al. Contributors to frailty in critical illness: Multi-dimensional  
39 28 analysis of the Clinical Frailty Scale. *Journal of critical care* 2019;52:193-99. doi:  
40 29 10.1016/j.jcrc.2019.04.032 [published Online First: 20190502]  
41 30  
42 58. Shears M, Takaoka A, Rochweg B, et al. Assessing frailty in the intensive care unit: A reliability and  
43 31 validity study. *J Crit Care* 2018;45:197-203. doi: 10.1016/j.jcrc.2018.02.004 [published Online  
44 32 First: 2018/03/27]  
45 33  
46 59. Neufeld KJ, Leoutsakos JS, Yan H, et al. Fatigue Symptoms During the First Year Following ARDS.  
47 34 *Chest* 2020;158(3):999-1007. doi: 10.1016/j.chest.2020.03.059 [published Online First:  
48 35 20200415]  
49 36  
50 60. Spadaro S, Capuzzo M, Valpiani G, et al. Fatigue in intensive care survivors one year after discharge.  
51 37 *Health Qual Life Outcomes* 2016;14(1):148. doi: 10.1186/s12955-016-0554-z [published Online  
52 38 First: 20161018]  
53 39  
54 61. Ware JE, Jr., Sherbourne CD. The MOS 36-item short-form health survey (SF-36). I. Conceptual  
55 40 framework and item selection. *Med Care* 1992;30(6):473-83.  
56 41  
57 62. Harris PA, Taylor R, Thielke R, et al. Research electronic data capture (REDCap)--a metadata-driven  
58 42 methodology and workflow process for providing translational research informatics support. *J*  
59 43 *Biomed Inform* 2009;42(2):377-81. doi: 10.1016/j.jbi.2008.08.010 [published Online First:  
60 44 20080930]  
61 45  
62 63. Vincent JL, Moreno R, Takala J, et al. The SOFA (Sepsis-related Organ Failure Assessment) score to  
63 46 describe organ dysfunction/failure. On behalf of the Working Group on Sepsis-Related Problems  
64 47 of the European Society of Intensive Care Medicine. *Intensive Care Med* 1996;22(7):707-10. doi:  
65 48 10.1007/BF01709751 [published Online First: 1996/07/01]



1  
2  
3 1 64. Single IRB for Multi-Site or Cooperative Research [Available from:  
4 2 <https://grants.nih.gov/policy/humansubjects/single-irb-policy-multi-site-research.htm> accessed  
5 3 January 12, 2023.  
6 4  
7  
8  
9  
10  
11  
12  
13  
14  
15  
16  
17  
18  
19  
20  
21  
22  
23  
24  
25  
26  
27  
28  
29  
30  
31  
32  
33  
34  
35  
36  
37  
38  
39  
40  
41  
42  
43  
44  
45  
46  
47  
48  
49  
50  
51  
52  
53  
54  
55  
56  
57  
58  
59  
60

For peer review only

1  
2  
3 **1 Figure Legends**  
4

5 2 Figure 1: Representative images of ultrasound acquisition techniques and the obtained image of the rectus  
6 femoris muscle.  
7

8  
9 4 *Caption: Panel A is a representative ultrasound image with anatomical structures labeled for the*  
10 *quadriceps muscle. Panel B demonstrates the technique to locate the anatomical landmarks for rectus*  
11 *femoris ultrasound (two-thirds of the distance from anterior superior iliac spine to the superior border of*  
12 *the patella). Panel C depicts the-minimal-to-no-compression technique using the ultrasound probe with*  
13 *adequate ultrasound transmission gel to obtain images.*  
14

15  
16 9 *\* These images were staged by the authors to demonstrate appropriate technique and were not taken*  
17 *from a patient encounter.*  
18  
19

20  
21  
22 10  
23  
24 11  
25  
26 12 Figure 2: Representative image of the performance of hand-held dynamometry to measure isometric knee  
27 extensor strength with a subject in the supine position with a towel roll keeping the knee in 20-30 degrees  
28 of flexion.  
29

30  
31 14  
32  
33 15 *\* This image was staged by the authors to demonstrate appropriate technique and was not taken from a*  
34 *patient encounter.*  
35  
36  
37  
38  
39  
40  
41  
42  
43  
44  
45  
46  
47  
48  
49  
50  
51  
52  
53  
54  
55  
56  
57

1  
2  
3  
4  
5  
6  
7  
8  
9  
10  
11  
12  
13  
14  
15  
16  
17  
18  
19  
20  
21  
22  
23  
24  
25  
26  
27  
28  
29  
30  
31  
32  
33  
34  
35  
36  
37  
38  
39  
40  
41  
42  
43  
44  
45  
46  
47  
48  
49  
50  
51  
52  
53  
54  
55  
56  
57  
58  
59  
60

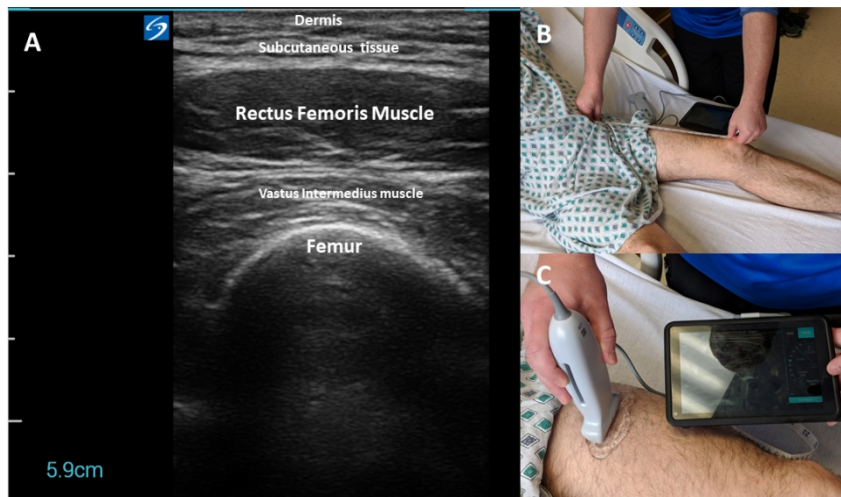

338x190mm (96 x 96 DPI)

1  
2  
3  
4  
5  
6  
7  
8  
9  
10  
11  
12  
13  
14  
15  
16  
17  
18  
19  
20  
21  
22  
23  
24  
25  
26  
27  
28  
29  
30  
31  
32  
33  
34  
35  
36  
37  
38  
39  
40  
41  
42  
43  
44  
45  
46  
47  
48  
49  
50  
51  
52  
53  
54  
55  
56  
57  
58  
59  
60



338x190mm (96 x 96 DPI)

1  
2  
3 End-of-study feedback survey for research study, "The Impact of Renal Replacement Therapy on the  
4 Development of Critical Illness Muscle Wasting"  
5  
6  
7

8 Patient subject no.: \_\_\_\_\_  
9  
10  
11  
12

13  
14 Thank you for participating in our study about the effects of acute kidney injury in the intensive care unit  
15 on muscle loss and muscle weakness. We ask that you to please fill out this brief survey to help us  
16 determine what kind of research would be best in the future.  
17  
18  
19

- 20  
21 1. Of all the tests we completed, including the different surveys you took and the different types of  
22 functional tests we performed, which one do you think was the most important or valuable to you  
23 as a survivor of acute kidney injury? Multiple answers are okay.  
24  
25  
26  
27  
28  
29  
30  
31  
32 2. Is there anything else about muscle strength and physical function that you think we should test or  
33 measure in future research in patients like yourself?  
34  
35  
36  
37  
38  
39  
40  
41  
42  
43  
44  
45  
46  
47  
48  
49  
50  
51  
52  
53  
54  
55  
56  
57  
58  
59  
60

1  
2  
3  
4  
5  
6 Official Title: Critical Illness Myopathy and Trajectory of  
7 Recovery in Acute Kidney Injury (AKI) Requiring Continuous  
8 Renal Replacement Therapy (CRRT): A Prospective  
9 Observational Trial  
10  
11  
12  
13  
14  
15

16  
17 NCT05287204  
18  
19

20  
21 Document Date: 1/7/2023  
22  
23  
24  
25  
26  
27  
28  
29  
30  
31  
32  
33  
34  
35  
36  
37  
38  
39  
40  
41  
42  
43  
44  
45  
46  
47  
48  
49  
50  
51  
52  
53  
54  
55  
56  
57  
58  
59  
60

## The University of New Mexico Health Sciences Center

### Consent and Authorization to Participate in a Research Study

#### Key Information for “The Impact of Renal Replacement Therapy (RRT) on the Development of Critical Illness Muscle Wasting” (HRRC ID 21-438)

You are being invited to take part in a research study about the impact of Continuous Renal Replacement Therapy (CRRT) on muscle wasting in ICU patients. We are asking you because you have been administered CRRT during your stay in the ICU. This page is to give you key information to help you decide whether to participate. We have included detailed information after this page. Ask the research team questions. If you have questions later, the contact information for the research investigator in charge of the study is below.

#### WHAT IS THE PURPOSE, PROCEDURES, AND DURATION OF THE STUDY?

By doing this study, we hope to learn if CRRT has an impact on muscle loss in patients admitted to the ICU, a common consequence of ICU admission. The study will consist of 3 parts: (1) ultrasound of a muscle in the leg (rectus femoris) to detect decrease in muscle size, (2) physical function assessments performed by physical therapists or other study members, and (3) collection of blood and CRRT effluent samples for analysis. CRRT effluent is the yellow fluid that is removed the body by CRRT that is similar to urine normally removed from the body by healthy kidneys. Your participation in this research will last about 3 months.

#### WHAT ARE THE KEY REASONS YOU MIGHT CHOOSE TO VOLUNTEER FOR THIS STUDY?

By participating in this study, you will help provide important information that can add to the quality of care for ICU patients in the future. For a complete description of benefits, refer to the Detailed Consent.

#### WHAT ARE THE KEY REASONS YOU MIGHT NOT CHOOSE TO VOLUNTEER FOR THIS STUDY?

The study will involve collection of biologic samples, including small amounts of blood, and ultrasound imaging. While the risk of these procedures is minimal, you may experience some discomfort and risk of infection from the blood draw. For a complete description of risks, refer to the Detailed Consent and/or Appendix.

#### DO YOU HAVE TO TAKE PART IN THE STUDY?

If you decide to take part in the study, it should be because you really want to volunteer. You will not lose any services, benefits or rights you would normally have if you choose not to volunteer.

#### WHAT IF YOU HAVE QUESTIONS, SUGGESTIONS OR CONCERNS?

The person in charge of this study is Dr. J. Pedro Teixeira of the University of New Mexico Health Sciences Center (UNM HSC), Department of Internal Medicine. If you have questions, suggestions, or concerns about this study or want to withdraw from the study, his contact information is 505-272-4751.

If you have any concerns or questions about your rights as a volunteer in this research, contact staff in the University of Kentucky (UK) Office of Research Integrity (ORI) between the business hours of 8am and 5pm Eastern Time, Monday-Friday at 859-257-9428 or toll free at 1-866-400-9428.

**DETAILED CONSENT**

Version 2 27Nov2022

Project Title: **The Impact of Renal Replacement Therapy (RRT) on the Development of Critical Illness Muscle Wasting (HRRC ID 21-438)**

**Principal Investigator:** J. Pedro Teixeira, MD  
University of New Mexico  
Department of Internal Medicine  
MSC10-5550  
1 University of New Mexico  
Albuquerque, NM 87131-0001  
505-272-4751

If you are the legally authorized representative of a person who is being invited to be in this study, the word “you” in this document refers to the person you represent. You will be asked to read and sign this document to give permission for the person you represent to participate in this research study.

This consent form describes the research study to help you decide if you want to participate. This form provides important information about what you will be asked to do during the study, about the risks and benefits of the study, and about your rights as a research subject.

- If you have any questions about or do not understand something in this form, you should ask the research team for more information.
- You should discuss your participation with anyone you choose such as family or friends.
- Do not agree to participate in this study unless the research team has answered your questions and you decide that you want to be part of this study.

**WHAT IS THE PURPOSE OF THIS STUDY?**

This is a research study. We are inviting you to participate in this research study because you have severe acute kidney injury (AKI), and will soon be initiated on dialysis, also called renal replacement therapy (RRT) (Cases).

OR- we are inviting you to participate in this research study because you have illness requiring intubation and are at risk for muscle loss while immobile in the intensive care unit (ICU) (Controls).

The purpose of this research study is to determine the impact of RRT on the rate of muscle loss in the intensive care unit (ICU), and the impact of RRT on the trajectory of muscle recovery following hospital discharge. The loss of muscle mass in the ICU can increase the risk of death while in the hospital, can prolong the time of recovery, and can lead to the development of more health problems in the future following hospital discharge.



### **HOW MANY PEOPLE WILL PARTICIPATE?**

Approximately 20 cases and controls will take part in this study conducted by investigators at the University of New Mexico. Approximately 40 others will be enrolled at the University of Iowa and University of Kentucky.

### **HOW LONG WILL I BE IN THIS STUDY?**

If you agree to take part in this study, your involvement will last for the duration of your hospitalization and for visits at 1 month and 3 months following hospital discharge. The time involved in the study in the hospital will be the time spent completing 2 muscle ultrasounds (each approximately 10-20 minutes in length) and the time spent collecting blood (and effluent for CRRT) samples, which will take 5-10 minutes per day for up to 7 days. We will collect data from the electronic medical record regarding outcomes like the number of days spend in the hospital. At the time of hospital discharge, you would undergo a series of muscle strength tests and muscle ultrasound, that are anticipated to take 30- 60 minutes. These procedures will be repeated at your 1- and 3-month visits to determine the trend in muscle recovery.

### **WHAT WILL HAPPEN DURING THIS STUDY?**

**For the case population:** Before you initiate RRT, or within 24 hours after initiation, you will undergo an ultrasound (US) to determine your muscle mass. The US will be repeated at 48 hours and again at 7 days or at ICU discharge, whichever comes first. The ultrasound will evaluate the size of your rectus femoris muscle, one of the muscles in your thigh. The ultrasound will take approximately 10-15 minutes to complete, and there should be no discomfort outside mild coolness from the ultrasound gel.

The first blood draw will take place before RRT initiation. After RRT is started, we will draw blood from the RRT machine daily while you are on CRRT. These blood draws can be taken directly from the RRT machine or from a central line, and so will not require additional needle sticks. The amount of blood taken at each time point is 5 mL (about 1 teaspoon). We will also collect effluent daily after RRT is initiated. Effluent is the waste fluid generated by the CRRT machine (akin to urine).

At the time of hospital discharge, you will undergo an ultrasound (US) to determine your muscle mass, and a series of muscle strength tests to determine the strength and functionality of your muscles. The ultrasound will take approximately 10-15 minutes to complete, and there should be no discomfort outside mild coolness from the ultrasound gel. The muscle strength testing will take 30-60 minutes, and there should be no discomfort other than discomfort from the use of your muscles. These tests will be repeated at visits scheduled to take place at 1 month and 3 months following hospital discharge.

**For the control population:** At the time of hospital discharge, you will undergo an ultrasound (US) to determine your muscle mass, and a series of muscle strength tests to determine the strength and functionality of your muscles. The ultrasound will take approximately 10-15 minutes to complete, and there should be no discomfort outside mild coolness from the ultrasound gel. The muscle strength testing will take 30-60 minutes, and there should be no discomfort other than discomfort from the use of your muscles. These tests will be repeated at visits scheduled to take place at 1 month and 3 months following hospital discharge.

**For both groups,** we would access your medical record to collect basic information about your case, such as why you developed acute kidney injury (cases), your vital signs, use of certain medications, and

laboratory data. We will not collect information like your social security number or any other information not directly related to this project.

### **Tissue/Blood/Data Storage for Future Use**

As part of this study, we are obtaining blood (and effluent in RRT patients) samples and data from you. We may like to study your blood (and effluent in RRT patients) and data in the future, after this study is over without further consent. Your sample, information, and/or data may be stored for later use in a central repository or other national repositories sponsored by the National Institutes of Health or other Federal agencies. If this happens, it may be stripped of identifiers (such as name, date of birth, address, etc.). Other qualified researchers who obtain proper permission may gain access to your sample and/or data for use in approved research studies that may or may not be related to in the purpose of this study.

The samples will not be used for whole genome sequencing.

The tests we might want to use to study your blood or effluent and data may not even exist at this time. Therefore, we are asking for your permission to store your blood and effluent and data so that we can study them in the future. These future studies may provide additional information that will be helpful in understanding critical illness muscle loss, but it is unlikely that what we learn from these studies will have a direct benefit to you. It is possible that your blood and effluent and data might be used to develop products tests, or discoveries that could be patented and licensed. In some instances, these may have potential commercial value and may be developed by the Investigators, University of Nex Mexico, commercial companies, organizations funding this research, or others that may not be working directly with this research team. However, donors of blood and effluent and data do not retain any property rights to the materials. Therefore, there are no plans to provide financial compensation to you should this occur.

Your blood samples and data will be stored with a code which may be linked to your medical record number. If you agree now to future use of your blood samples and data but decide in the future that you would like to have it removed from future research, you should contact Dr. J. Pedro Teixeira. However, if some research with your blood samples and data has already been completed, the information from that research may still be used.

Do you give permission for your identifiable samples (blood, effluent) to be stored, used, and shared for future research?

Yes  No Initials \_\_\_\_\_

Remember, you can still be in the main study even if you do not wish to allow your information and/or specimens stored or shared for future research.

### **WILL I BE NOTIFIED IF THERE IS AN UNEXPECTED FINDING IN MY BLOOD (OR EFFLUENT, IN CRRT PATIENTS)?**

The results from the blood and effluent and data we collect in this research study are not the same quality as what you would receive as part of your routine health care. The blood and effluent and data results will not be reviewed by a physician who normally reads such results. Due to this, you will not be informed of any unexpected findings. The results of your blood and effluent and data will not be placed in your medical record with your primary care physician or otherwise. If you believe you are having symptoms that may require care, you should contact your primary care physician.

## **WHAT ARE THE RISKS OF THIS STUDY?**

You may experience one or more of the risks indicated below from being in this study. In addition to these, there may be other unknown risks, or risks that we did not anticipate, associated with being in this study.

### **Blood collection:**

For RRT patients:

When RRT is initiated, there will be labs drawn as part of the usual care provided to patients undergoing this procedure. We will draw our first set of labs at the same time, so there shouldn't be any additional venipuncture as part of this study. Subsequent labs after CRRT initiation will be taken directly from the machine circuit or arterial line. The total amount of blood that we take is 5 mL (or about 1 teaspoon) per day. This amount of blood is small and safe. It will not increase your need for a blood transfusion. Accessing the dialysis circuit or arterial line for obtaining the research blood samples may increase the risk of infection. However, we will try as much as possible to combine these draws with labs that will be drawn anyway as part of routine CRRT care, so additional risk should be minimal. Risks related to the muscle strength testing could include muscle injury, although these risks are low, and these tests are generally considered minimal risk within the medical community.

For Controls:

Risks related to the muscle strength testing could include muscle injury, although these risks are low, and these tests are generally considered minimal risk within the medical community.

### **Effluent collection (for RRT patients):**

There should be no discomforts or risks associated with collection of effluent. The effluent will be collected directly from the dialysis circuit.

### **Ultrasound**

Ultrasound is a non-invasive imaging procedure. There may be some mild discomfort related to the application of gel or pressure from the probe, but all discomforts are expected to be minimal. There are no known long-term health risks associated with ultrasound.

### **Confidentiality:**

There is potential risk of loss of confidentiality. Efforts will be made to keep your personal information private and confidential. You will be identified by a code, and personal information from your records will not be released without your written permission. Data will be stored on a secure database (REDCap) supported by the University of Kentucky.

## **WHAT ARE THE BENEFITS OF THIS STUDY?**

You will not benefit from being in this study. The study is designed for the researcher to learn more about the effect of kidney injury on the muscles in patients after CRRT initiation. However, we hope that, in the future, other people might benefit from this study from the knowledge gained.

## **WILL IT COST ME ANYTHING TO BE IN THIS STUDY?**

You will not have any additional costs related to being in this research study. You and/or your medical/hospital insurance carrier will remain responsible for your regular medical care expenses.

### **WILL I BE PAID FOR PARTICIPATING?**

You will not be paid for being in this research study.

### **WHO IS FUNDING THIS STUDY?**

This study will be funded by a grant from the Western States Consortium, composed of six institutions with Clinical and Translational Sciences Award (CTSA) Program institutions. This means that the University of New Mexico is receiving payments to support the activities that are required to conduct the study. No one on the research team will receive a direct payment or increase in salary for conducting this study.

### **WHAT IF I AM INJURED AS A RESULT OF THIS STUDY?**

If you believe you are hurt or if you get sick because of something that is due to the study, you should call Dr. J. Pedro Teixeira at 505-272-4751 immediately. Dr. Teixeira will determine what type of treatment, if any, is best for you at that time. It is important for you to understand that the University of New Mexico does not have funds set aside to pay for the cost of any care or treatment that might be necessary because you get hurt or sick while taking part in this study. Also, the University of New Mexico will not pay for any wages you may lose if you are harmed by this study.

Medical costs related to your care and treatment because of study-related harm will be your responsibility; or

- may be paid by your insurer if you are insured by a health insurance company (you should ask your insurer if you have any questions regarding your insurer's willingness to pay under these circumstances); or
- may be paid by Medicare or Medicaid if you are covered by Medicare or Medicaid (If you have any questions regarding Medicare/Medicaid coverage you should contact Medicare by calling 1-800-Medicare (1-800-633-4227) or Medicaid 1-800-635-2570.).

A co-payment/deductible may be needed by your insurer or Medicare/Medicaid even if your insurer or Medicare/Medicaid has agreed to pay the costs. The amount of this co-payment/deductible may be costly. You do not give up your legal rights by signing this form.

### **WHAT ABOUT CONFIDENTIALITY?**

We will keep your participation in this research study confidential to the extent permitted by law, and all signed consent forms will be retained and securely stored at the University of New Mexico. However, it is possible that other people such as those indicated below may become aware of your participation in this study and may inspect and copy records pertaining to this research. Some of these records could contain information that personally identifies you.

- Federal government regulatory agencies,
- Auditing departments of the University of New Mexico or the University of Kentucky
- The Institutional Review Board (IRB, a committee that reviews and approves research studies) at the University of Kentucky or the Institutional Review Board at the University of New Mexico

To help protect your confidentiality, you will be identified by a code known only to the research team. Data will be stored on a secure database supported by the University of Kentucky. Paper copies of this consent will be stored in a locked drawer in a secured office on the UNM HSC campus. Badge access is needed to enter the building after hours and only the study principal investigator (Dr. Teixeira) has access to the key to the locked drawer. Biospecimens will be stored in a secure lab requiring a UNM

HSC badge for entry. The biospecimens will be stored with a code, so samples cannot be linked to you without the master list secured on the University of New Mexico database site (secured access folder on HSC central IT managed network storage). Electronic data will be stored within REDCap, which is a secure data storage platform operated by the University of Kentucky. If data is transferred for statistical analysis, names and other identifying information will be removed beforehand.

If we write a report or article about this study or share the study data set with others, we will do so in such a way that you cannot be directly identified.

The University of New Mexico Hospital generally requires that we document your participation in research occurring in a UNM HSC facility. This documentation will be in either your medical record or a database maintained on behalf of the institution reflecting that you are participating in this study. The information included will provide contact information for the research team as well as information about the risks associated with this study. We will keep this Informed Consent Document in our research files; it will not be placed in your medical record chart.

### **IS BEING IN THIS STUDY VOLUNTARY?**

Taking part in this research study is completely voluntary. You may choose not to take part at all. If you decide to be in this study, you may stop participating at any time. If you decide not to be in this study, or if you stop participating at any time, you won't be penalized or lose any benefits for which you otherwise qualify.

### **CAN SOMEONE ELSE END MY PARTICIPATION IN THIS STUDY?**

Under certain circumstances, the researchers might decide to end your participation in this research study earlier than planned. This might happen because in our judgment it would not be safe for you to continue, because your condition has become worse.

### **WHAT IF I HAVE QUESTIONS?**

We encourage you to ask questions. If you have any questions about the research study itself, please contact: J. Pedro Teixeira, MD at 505-272-4751.

If you have questions, concerns, or complaints about your rights as a research subject or about research related injury, please contact the Office of Research Integrity, 405 Kinkead Hall, University of Kentucky, Lexington, KY 40506 (859) 257-9428, email: [rs\\_ORI@uky.edu](mailto:rs_ORI@uky.edu) General information about being a research subject can be found by clicking "Participants" on the Office of Research Integrity web site, <https://www.research.uky.edu/office-research-integrity>. To offer input about your experiences as a research subject or to speak to someone other than the research staff, call the Office of Research Integrity at the number above.

### **AUTHORIZATION TO USE OR DISCLOSE YOUR IDENTIFIABLE HEALTH INFORMATION**

**The privacy law, HIPAA (Health Insurance Portability and Accountability Act), requires researchers to protect your health information. The following sections of the form describe how researchers may use your health information.**

### **Your health information that may be accessed, used and/or released includes:**

Page 9 of 9

- Physical exams, blood tests, and other diagnostic and medical procedures, as well as medical history.
- Demographic information, including: name, age, height/weight, address/telephone number, and medical record number (MRN)

**The Researchers may use and share your health information with:**

- The Institutional Review Boards at the University of Kentucky or the University of New Mexico;
- Law enforcement agencies when required by law;
- University of New Mexico representatives;
- UNM HSC and their representatives
- Health systems outside of UNM for which you have a patient relationship;
- Federal regulatory agencies [i.e., the Food and Drug Administration (FDA), National Institutes of Health (NIH)]
- Clinical & Translational Science Center (CTSC)

The researchers agree to only share your health information with the people listed in this document. Should your health information be released to anyone that is not regulated by the privacy law, your health information may be shared with others without your permission; however, the use of your health information may still be regulated by applicable federal and state laws.

**You may not be allowed to participate in the research study if you do not sign this form. If you decide not to sign this form, it will not affect you:**

- Current or future healthcare at the University of New Mexico;
- Current or future payments to the University of New Mexico;
- Ability to enroll in any health plans (if applicable); or
- Eligibility for benefits (if applicable).

After signing the form, you can change your mind and NOT let the researcher(s) collect or release your health information (revoke the Authorization). If you revoke the authorization:

- Send a written letter to: Dr. J. Pedro Teixeira (MSC10-5550, 1 University of New Mexico, Albuquerque, NM 87131-0001) to inform him of your decision.
- Researchers may use and release your health information already collected for this research study.
- Your protected health information may still be used and released should you have a bad reaction (adverse event).

**The use and sharing of your information have no time limit.**

If you have not already received a copy of the Privacy Notice, you may request one. If you have any questions about your privacy rights, you should contact the UNM HSC Privacy Officer between the business hours of 8am and 5pm MT, Monday-Friday at (505) 272-1493.

**INFORMED CONSENT SIGNATURE PAGE (HRRC ID 21-438)**

You are participating or are authorized to act on behalf of the participant. This consent includes the following:

- Key Information Page
- Detailed Consent

You will receive a copy of this consent form after it has been signed.

\_\_\_\_\_  
**Signature of research subject, or if applicable,**  
*\*research subject's legal representative*

\_\_\_\_\_  
**Date**

\_\_\_\_\_  
**Printed name of research subject**

\_\_\_\_\_  
*\*If applicable, printed name of research subject's legal representative*

\*If applicable, please explain Representative's relationship to subject and include a description of representative's authority to act on behalf of subject:

\_\_\_\_\_  
 Printed name of [authorized] person obtaining  
 informed consent/HIPAA Authorization

\_\_\_\_\_  
 Date

\_\_\_\_\_  
 Signature of [authorized] person obtaining  
 informed consent/HIPAA Authorization

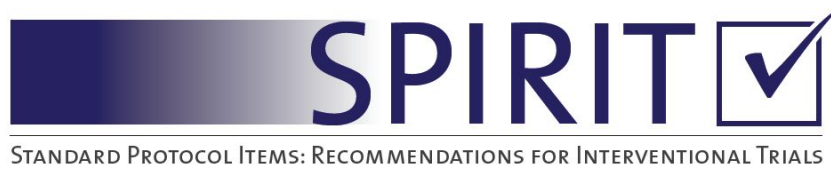

STANDARD PROTOCOL ITEMS: RECOMMENDATIONS FOR INTERVENTIONAL TRIALS

SPIRIT 2013 Checklist: Recommended items to address in a clinical trial protocol and related documents\*

| Section/item                      | Item No | Description                                                                                                                                                                                                                                                                                                                                                               |
|-----------------------------------|---------|---------------------------------------------------------------------------------------------------------------------------------------------------------------------------------------------------------------------------------------------------------------------------------------------------------------------------------------------------------------------------|
| <b>Administrative information</b> |         |                                                                                                                                                                                                                                                                                                                                                                           |
| Title                             | 1       | Descriptive title identifying the study design, population, interventions, and, if applicable, trial acronym: <b>page 1, lines 1-2</b>                                                                                                                                                                                                                                    |
| Trial registration                | 2a      | Trial identifier and registry name. If not yet registered, name of intended registry: <b>page 1, line 34</b>                                                                                                                                                                                                                                                              |
|                                   | 2b      | All items from the World Health Organization Trial Registration Data Set: <b>See attachment below.</b>                                                                                                                                                                                                                                                                    |
| Protocol version                  | 3       | Date and version identifier: <b>page 16, line 25</b>                                                                                                                                                                                                                                                                                                                      |
| Funding                           | 4       | Sources and types of financial, material, and other support: <b>page 18, line 9-16</b>                                                                                                                                                                                                                                                                                    |
| Roles and responsibilities        | 5a      | Names, affiliations, and roles of protocol contributors: <b>Title page; page 18, lines 1-7</b>                                                                                                                                                                                                                                                                            |
|                                   | 5b      | Name and contact information for the trial sponsor: <b>see WHO trial registration data set below or clinicaltrials.gov posting</b>                                                                                                                                                                                                                                        |
|                                   | 5c      | Role of study sponsor and funders, if any, in study design; collection, management, analysis, and interpretation of data; writing of the report; and the decision to submit the report for publication, including whether they will have ultimate authority over any of these activities: <b>page 18, lines 11-13</b>                                                     |
|                                   | 5d      | Composition, roles, and responsibilities of the coordinating centre, steering committee, endpoint adjudication committee, data management team, and other individuals or groups overseeing the trial, if applicable (see Item 21a for data monitoring committee): <b>N/A (all these tasks will be carried out by the three primary investigators in this pilot trial)</b> |
| <b>Introduction</b>               |         |                                                                                                                                                                                                                                                                                                                                                                           |
| Background and rationale          | 6a      | Description of research question and justification for undertaking the trial, including summary of relevant studies (published and unpublished) examining benefits and harms for each intervention: <b>page 4, line 1, through page 5, line 13</b>                                                                                                                        |



|    |                                                           |     |                                                                                                                                                                                                                                                                                                                                                                                                                                           |
|----|-----------------------------------------------------------|-----|-------------------------------------------------------------------------------------------------------------------------------------------------------------------------------------------------------------------------------------------------------------------------------------------------------------------------------------------------------------------------------------------------------------------------------------------|
| 1  |                                                           | 6b  | Explanation for choice of comparators: <b>page 7, lines 3-11</b>                                                                                                                                                                                                                                                                                                                                                                          |
| 2  |                                                           |     |                                                                                                                                                                                                                                                                                                                                                                                                                                           |
| 3  |                                                           |     |                                                                                                                                                                                                                                                                                                                                                                                                                                           |
| 4  | Objectives                                                | 7   | Specific objectives or hypotheses: <b>page 5, line 19, to page 6, line 7</b>                                                                                                                                                                                                                                                                                                                                                              |
| 5  |                                                           |     |                                                                                                                                                                                                                                                                                                                                                                                                                                           |
| 6  | Trial design                                              | 8   | Description of trial design including type of trial (eg, parallel group, crossover, factorial, single group), allocation ratio, and framework (eg, superiority, equivalence, noninferiority, exploratory): <b>page 6, lines 10-13</b>                                                                                                                                                                                                     |
| 7  |                                                           |     |                                                                                                                                                                                                                                                                                                                                                                                                                                           |
| 8  |                                                           |     |                                                                                                                                                                                                                                                                                                                                                                                                                                           |
| 9  |                                                           |     |                                                                                                                                                                                                                                                                                                                                                                                                                                           |
| 10 |                                                           |     |                                                                                                                                                                                                                                                                                                                                                                                                                                           |
| 11 |                                                           |     |                                                                                                                                                                                                                                                                                                                                                                                                                                           |
| 12 | <b>Methods: Participants, interventions, and outcomes</b> |     |                                                                                                                                                                                                                                                                                                                                                                                                                                           |
| 13 |                                                           |     |                                                                                                                                                                                                                                                                                                                                                                                                                                           |
| 14 | Study setting                                             | 9   | Description of study settings (eg, community clinic, academic hospital) and list of countries where data will be collected. Reference to where list of study sites can be obtained: <b>page 6, lines 14-16</b>                                                                                                                                                                                                                            |
| 15 |                                                           |     |                                                                                                                                                                                                                                                                                                                                                                                                                                           |
| 16 |                                                           |     |                                                                                                                                                                                                                                                                                                                                                                                                                                           |
| 17 |                                                           |     |                                                                                                                                                                                                                                                                                                                                                                                                                                           |
| 18 | Eligibility criteria                                      | 10  | Inclusion and exclusion criteria for participants. If applicable, eligibility criteria for study centres and individuals who will perform the interventions (eg, surgeons, psychotherapists): <b>page 6, line 17, to page 7, line 2</b>                                                                                                                                                                                                   |
| 19 |                                                           |     |                                                                                                                                                                                                                                                                                                                                                                                                                                           |
| 20 |                                                           |     |                                                                                                                                                                                                                                                                                                                                                                                                                                           |
| 21 |                                                           |     |                                                                                                                                                                                                                                                                                                                                                                                                                                           |
| 22 |                                                           |     |                                                                                                                                                                                                                                                                                                                                                                                                                                           |
| 23 |                                                           |     |                                                                                                                                                                                                                                                                                                                                                                                                                                           |
| 24 | Interventions                                             | 11a | Interventions for each group with sufficient detail to allow replication, including how and when they will be administered: <b>N/A (observational study)</b>                                                                                                                                                                                                                                                                              |
| 25 |                                                           |     |                                                                                                                                                                                                                                                                                                                                                                                                                                           |
| 26 |                                                           |     |                                                                                                                                                                                                                                                                                                                                                                                                                                           |
| 27 |                                                           |     |                                                                                                                                                                                                                                                                                                                                                                                                                                           |
| 28 |                                                           | 11b | Criteria for discontinuing or modifying allocated interventions for a given trial participant (eg, drug dose change in response to harms, participant request, or improving/worsening disease): <b>N/A (observational study)</b>                                                                                                                                                                                                          |
| 29 |                                                           |     |                                                                                                                                                                                                                                                                                                                                                                                                                                           |
| 30 |                                                           |     |                                                                                                                                                                                                                                                                                                                                                                                                                                           |
| 31 |                                                           |     |                                                                                                                                                                                                                                                                                                                                                                                                                                           |
| 32 |                                                           |     |                                                                                                                                                                                                                                                                                                                                                                                                                                           |
| 33 |                                                           |     |                                                                                                                                                                                                                                                                                                                                                                                                                                           |
| 34 |                                                           | 11c | Strategies to improve adherence to intervention protocols, and any procedures for monitoring adherence (eg, drug tablet return, laboratory tests): <b>N/A (observational study)</b>                                                                                                                                                                                                                                                       |
| 35 |                                                           |     |                                                                                                                                                                                                                                                                                                                                                                                                                                           |
| 36 |                                                           |     |                                                                                                                                                                                                                                                                                                                                                                                                                                           |
| 37 |                                                           |     |                                                                                                                                                                                                                                                                                                                                                                                                                                           |
| 38 |                                                           | 11d | Relevant concomitant care and interventions that are permitted or prohibited during the trial: <b>N/A (observational study)</b>                                                                                                                                                                                                                                                                                                           |
| 39 |                                                           |     |                                                                                                                                                                                                                                                                                                                                                                                                                                           |
| 40 |                                                           |     |                                                                                                                                                                                                                                                                                                                                                                                                                                           |
| 41 | Outcomes                                                  | 12  | Primary, secondary, and other outcomes, including the specific measurement variable (eg, systolic blood pressure), analysis metric (eg, change from baseline, final value, time to event), method of aggregation (eg, median, proportion), and time point for each outcome. Explanation of the clinical relevance of chosen efficacy and harm outcomes is strongly recommended: <b>page 7, line 13, to page 11, line 11 [skip page 8]</b> |
| 42 |                                                           |     |                                                                                                                                                                                                                                                                                                                                                                                                                                           |
| 43 |                                                           |     |                                                                                                                                                                                                                                                                                                                                                                                                                                           |
| 44 |                                                           |     |                                                                                                                                                                                                                                                                                                                                                                                                                                           |
| 45 |                                                           |     |                                                                                                                                                                                                                                                                                                                                                                                                                                           |
| 46 |                                                           |     |                                                                                                                                                                                                                                                                                                                                                                                                                                           |
| 47 |                                                           |     |                                                                                                                                                                                                                                                                                                                                                                                                                                           |
| 48 |                                                           |     |                                                                                                                                                                                                                                                                                                                                                                                                                                           |
| 49 |                                                           |     |                                                                                                                                                                                                                                                                                                                                                                                                                                           |
| 50 |                                                           |     |                                                                                                                                                                                                                                                                                                                                                                                                                                           |
| 51 | Participant timeline                                      | 13  | Time schedule of enrolment, interventions (including any run-ins and washouts), assessments, and visits for participants. A schematic diagram is highly recommended (see Figure): <b>page 12, lines 3-12</b>                                                                                                                                                                                                                              |
| 52 |                                                           |     |                                                                                                                                                                                                                                                                                                                                                                                                                                           |
| 53 |                                                           |     |                                                                                                                                                                                                                                                                                                                                                                                                                                           |
| 54 |                                                           |     |                                                                                                                                                                                                                                                                                                                                                                                                                                           |
| 55 | Sample size                                               | 14  | Estimated number of participants needed to achieve study objectives and how it was determined, including clinical and statistical assumptions supporting any sample size calculations: <b>page 13, lines 1-10</b>                                                                                                                                                                                                                         |
| 56 |                                                           |     |                                                                                                                                                                                                                                                                                                                                                                                                                                           |
| 57 |                                                           |     |                                                                                                                                                                                                                                                                                                                                                                                                                                           |
| 58 |                                                           |     |                                                                                                                                                                                                                                                                                                                                                                                                                                           |
| 59 |                                                           |     |                                                                                                                                                                                                                                                                                                                                                                                                                                           |
| 60 |                                                           |     |                                                                                                                                                                                                                                                                                                                                                                                                                                           |

1  
2 Recruitment 15 Strategies for achieving adequate participant enrolment to reach  
3 target sample size: **page 13, lines 11-21**  
4

5 **Methods: Assignment of interventions (for controlled trials)**  
6

7 Allocation:

- 8  
9 Sequence generation 16a Method of generating the allocation sequence (eg, computer-  
10 generated random numbers), and list of any factors for stratification.  
11 To reduce predictability of a random sequence, details of any planned  
12 restriction (eg, blocking) should be provided in a separate document  
13 that is unavailable to those who enrol participants or assign  
14 interventions: ***N/A (single-arm non-interventional study)***  
15  
16  
17 Allocation concealment 16b Mechanism of implementing the allocation sequence (eg, central  
18 telephone; sequentially numbered, opaque, sealed envelopes),  
19 describing any steps to conceal the sequence until interventions are  
20 assigned: ***N/A (single-arm non-interventional study)***  
21  
22  
23 Implementation 16c Who will generate the allocation sequence, who will enrol participants,  
24 and who will assign participants to interventions: ***N/A (single-arm non-***  
25 ***interventional study)***  
26  
27 Blinding 17a Who will be blinded after assignment to interventions (eg, trial  
28 (masking) participants, care providers, outcome assessors, data analysts), and  
29 how: ***N/A (single-arm non-interventional study)***  
30  
31  
32 17b If blinded, circumstances under which unblinding is permissible, and  
33 procedure for revealing a participant's allocated intervention during  
34 the trial: ***N/A (single-arm non-interventional study)***  
35

36 **Methods: Data collection, management, and analysis**  
37

- 38 Data collection 18a Plans for assessment and collection of outcome, baseline, and other  
39 methods trial data, including any related processes to promote data quality (eg,  
40 duplicate measurements, training of assessors) and a description of  
41 study instruments (eg, questionnaires, laboratory tests) along with  
42 their reliability and validity, if known. Reference to where data  
43 collection forms can be found, if not in the protocol: **page 7, line 8, to**  
44 **page 12, line 5 [skip page 8]; page 14, lines 2-13; page 17, line 16.**  
45  
46  
47 18b Plans to promote participant retention and complete follow-up,  
48 including list of any outcome data to be collected for participants who  
49 discontinue or deviate from intervention protocols: **page 13, lines 17-**  
50 **21.**  
51  
52  
53 Data 19 Plans for data entry, coding, security, and storage, including any  
54 management related processes to promote data quality (eg, double data entry;  
55 range checks for data values). Reference to where details of data  
56 management procedures can be found, if not in the protocol: **page 11,**  
57 **line 12, to page 12, line 2; page 14, lines 5-7 and 14-16**  
58  
59  
60

- 1  
2  
3  
4  
5  
6  
7  
8  
9  
10  
11  
12  
13
- Statistical methods 20a Statistical methods for analysing primary and secondary outcomes. Reference to where other details of the statistical analysis plan can be found, if not in the protocol: **page 14, line 17, to page 16, line 19**
- 20b Methods for any additional analyses (eg, subgroup and adjusted analyses): **N/A**
- 20c Definition of analysis population relating to protocol non-adherence (eg, as randomised analysis), and any statistical methods to handle missing data (eg, multiple imputation): **page 13, lines 19-21**

#### 14 **Methods: Monitoring**

- 15  
16  
17  
18  
19  
20  
21  
22  
23  
24  
25  
26  
27  
28  
29  
30  
31  
32  
33  
34  
35  
36  
37
- Data monitoring 21a Composition of data monitoring committee (DMC); summary of its role and reporting structure; statement of whether it is independent from the sponsor and competing interests; and reference to where further details about its charter can be found, if not in the protocol. Alternatively, an explanation of why a DMC is not needed: **N/A (non-interventional study)**
- 21b Description of any interim analyses and stopping guidelines, including who will have access to these interim results and make the final decision to terminate the trial: **N/A (non-interventional study)**
- Harms 22 Plans for collecting, assessing, reporting, and managing solicited and spontaneously reported adverse events and other unintended effects of trial interventions or trial conduct: **N/A (non-interventional study)**
- Auditing 23 Frequency and procedures for auditing trial conduct, if any, and whether the process will be independent from investigators and the sponsor: **N/A (non-interventional study)**

#### 38 **Ethics and dissemination**

- 39  
40  
41  
42  
43  
44  
45  
46  
47  
48  
49  
50  
51  
52  
53  
54  
55  
56  
57  
58  
59  
60
- Research ethics approval 24 Plans for seeking research ethics committee/institutional review board (REC/IRB) approval: **page 16, lines 22-24**
- Protocol amendments 25 Plans for communicating important protocol modifications (eg, changes to eligibility criteria, outcomes, analyses) to relevant parties (eg, investigators, REC/IRBs, trial participants, trial registries, journals, regulators): **page 16, lines 25-26**
- Consent or assent 26a Who will obtain informed consent or assent from potential trial participants or authorised surrogates, and how (see Item 32): **page 17, lines 1-6**
- 26b Additional consent provisions for collection and use of participant data and biological specimens in ancillary studies, if applicable: **see page 5 of supplemental material 2 (ICF).**

|    |                   |     |                                                                                  |
|----|-------------------|-----|----------------------------------------------------------------------------------|
| 1  |                   |     |                                                                                  |
| 2  | Confidentiality   | 27  | How personal information about potential and enrolled participants will          |
| 3  |                   |     | be collected, shared, and maintained in order to protect confidentiality         |
| 4  |                   |     | before, during, and after the trial: <b>page 17, lines 8-13</b>                  |
| 5  |                   |     |                                                                                  |
| 6  | Declaration of    | 28  | Financial and other competing interests for principal investigators for          |
| 7  | interests         |     | the overall trial and each study site: <b>page 18, line 18</b>                   |
| 8  |                   |     |                                                                                  |
| 9  | Access to data    | 29  | Statement of who will have access to the final trial dataset, and                |
| 10 |                   |     | disclosure of contractual agreements that limit such access for                  |
| 11 |                   |     | investigators: <b>page 17, lines 14-15</b>                                       |
| 12 |                   |     |                                                                                  |
| 13 | Ancillary and     | 30  | Provisions, if any, for ancillary and post-trial care, and for                   |
| 14 | post-trial care   |     | compensation to those who suffer harm from trial participation: <b>see</b>       |
| 15 |                   |     | <b>page 5 of supplemental material 2 (ICF).</b>                                  |
| 16 |                   |     |                                                                                  |
| 17 | Dissemination     | 31a | Plans for investigators and sponsor to communicate trial results to              |
| 18 | policy            |     | participants, healthcare professionals, the public, and other relevant           |
| 19 |                   |     | groups (eg, via publication, reporting in results databases, or other            |
| 20 |                   |     | data sharing arrangements), including any publication restrictions:              |
| 21 |                   |     | <b>page 17, lines 16-20</b>                                                      |
| 22 |                   |     |                                                                                  |
| 23 |                   | 31b | Authorship eligibility guidelines and any intended use of professional           |
| 24 |                   |     | writers: <b>page 18, lines 8-10</b>                                              |
| 25 |                   |     |                                                                                  |
| 26 |                   | 31c | Plans, if any, for granting public access to the full protocol, participant-     |
| 27 |                   |     | level dataset, and statistical code: <b>page 17, lines 14-20</b>                 |
| 28 |                   |     |                                                                                  |
| 29 |                   |     |                                                                                  |
| 30 |                   |     |                                                                                  |
| 31 |                   |     |                                                                                  |
| 32 | <b>Appendices</b> |     |                                                                                  |
| 33 |                   |     |                                                                                  |
| 34 | Informed consent  | 32  | Model consent form and other related documentation given to                      |
| 35 | materials         |     | participants and authorised surrogates: <b>supplemental material 2</b>           |
| 36 |                   |     | <b>(ICF)</b>                                                                     |
| 37 |                   |     |                                                                                  |
| 38 | Biological        | 33  | Plans for collection, laboratory evaluation, and storage of biological           |
| 39 | specimens         |     | specimens for genetic or molecular analysis in the current trial and for         |
| 40 |                   |     | future use in ancillary studies, if applicable: <b>page 7, lines 24-26; page</b> |
| 41 |                   |     | <b>9, lines 1-3; page 14, lines 7-11</b>                                         |
| 42 |                   |     |                                                                                  |
| 43 |                   |     |                                                                                  |

---

\*It is strongly recommended that this checklist be read in conjunction with the SPIRIT 2013 Explanation & Elaboration for important clarification on the items. Amendments to the protocol should be tracked and dated. The SPIRIT checklist is copyrighted by the SPIRIT Group under the Creative Commons "[Attribution-NonCommercial-NoDerivs 3.0 Unported](https://creativecommons.org/licenses/by-nc-nd/3.0/)" license.

1 WHO Trial Registration Data Set  
2  
3

- 4 1. Primary Registry and Trial Identifying Number: NCT05287204  
5  
6 2. Date of Registration in Primary Registry: March 18, 2022  
7  
8 3. Secondary Identifying Numbers: University of Kentucky IRB# 71153 (single IRB), CTSA  
9 Project ID #: CTSC006-13  
10  
11 4. Source(s) of Monetary or Material Support: Clinical and Translational Science Awards  
12 Inter-Institutional Pilot Project Award  
13  
14 5. Primary Sponsor: University of Iowa  
15  
16 6. Secondary Sponsor(s): University of Kentucky, University of New Mexico  
17  
18 7. Contact for Public Queries:  
19 Institute for Clinical and Translational Science  
20 University of Iowa  
21 200 Hawkins Drive  
22 Iowa City, IA 52242  
23 deshauna-jones@uiowa.edu  
24 319-356-1060  
25  
26 8. Contact for Scientific Queries:  
27 Benjamin R. Griffin, MD  
28 Assistant Professor  
29 Division of Nephrology, Department of Internal Medicine  
30 University of Iowa Hospitals and Clinics  
31 200 Hawkins Dr  
32 Iowa City, IA 52242  
33 319-384-8197  
34 [benjamingriffin@uiowa.edu](mailto:benjamingriffin@uiowa.edu)  
35  
36 9. Public Title: Impact of CRRT on the Development of Critical Illness Muscle Wasting  
37  
38 10. Scientific Title: Impact of CRRT on the Development of Critical Illness Muscle Wasting  
39  
40 11. Countries of Recruitment: United States  
41  
42 12. Health Condition(s) or Problem(s) Studied: acute kidney injury  
43  
44 13. Intervention(s): N/A (observational study)  
45  
46 14. Key Inclusion and Exclusion Criteria:  
47  
48 ○ Inclusion: acute kidney injury requiring continuous renal replacement therapy  
49 (CRRT) within 48 hours of admission to the intensive care unit (ICU)  
50  
51 ○ Exclusion criteria:  
52 A. ICU admission for greater than 7 days  
53  
54  
55  
56  
57  
58  
59  
60

- B. Renal replacement therapy of any kind at any time before ICU admission
- C. Chronic kidney disease with estimated glomerular filtration rate <20 mL/min/1.73 m<sup>2</sup>
- D. Underlying muscle disorders or muscle atrophy such as quadriplegia or hemiplegia
- E. Stroke with residual motor deficits
- F. End-stage liver disease
- G. Active alcohol use disorder
- H. Active malignancy (other than non-melanoma skin cancer) within 1 year
- I. Burns
- J. Other baseline neuromuscular disease
- K. Pregnancy
- L. Concomitant use of other extracorporeal support devices such as ventricular assisted devices (VADs) or extracorporeal membrane oxygenation (ECMO)
- M. Anticipated inability to engage in weight-bearing testing after discharge (e.g., trauma or orthopedic surgery)

15. Study Type: This is a prospective observational single-arm study (using historical controls) with a purpose of analyzing the effect of acute kidney injury requiring continuous renal replacement therapy (CRRT) on the development of ICU-acquired weakness using 3 methods: (1) muscle ultrasound, (2) assessments of physical function and muscle strength, and (3) analysis of biological samples (metabolomics of blood and CRRT effluent).

16. Date of First Enrollment: August 1, 2022

17. Sample Size: target sample size 60 (20 patients each at 3 sites), to be compared to 60 historical controls; current enrolment: 15 (as of April 15, 2023)

18. Recruitment status of this trial: Recruiting

19. Primary Outcome(s): change in muscle ultrasound parameters (rectus femoris cross sectional area, muscle thickening, and echo intensity) in patients between study enrollment and study day 7 or ICU discharge

20. Key Secondary Outcomes:

- Physical function assessments (including strength assessment using hand-held and hand-grip dynamometry) at hospital discharge and at 1-3 months after discharge
- Metabolomic analysis of blood and CRRT effluent (at day 0, day 3, and day 7 or ICU discharge if sooner)

21. Ethics Review:

- Approved (IRB #71153)
- Initial Approval June 7, 2022; most recent protocol revision approved January 7, 2023
- Office Research Integrity at the University of Kentucky (859-257-9428, [rs\\_ORI@uky.edu](mailto:rs_ORI@uky.edu))

1  
2  
3 22. Completion date: September 30, 2023  
4

5 23. Summary Results: pending  
6

7 24. IPD sharing statement: The final de-identified dataset will be made fully accessible  
8 upon reasonable request once the results are published.  
9  
10  
11  
12  
13  
14  
15  
16  
17  
18  
19  
20  
21  
22  
23  
24  
25  
26  
27  
28  
29  
30  
31  
32  
33  
34  
35  
36  
37  
38  
39  
40  
41  
42  
43  
44  
45  
46  
47  
48  
49  
50  
51  
52  
53  
54  
55  
56  
57  
58  
59  
60

For peer review only

STROBE Statement—Checklist of items that should be included in reports of *cohort studies*

|                           | Item No | Recommendation                                                                                                                                                                                    | Page No      |
|---------------------------|---------|---------------------------------------------------------------------------------------------------------------------------------------------------------------------------------------------------|--------------|
| <b>Title and abstract</b> | 1       | (a) Indicate the study's design with a commonly used term in the title or the abstract                                                                                                            | 1            |
|                           |         | (b) Provide in the abstract an informative and balanced summary of what was done and what was found                                                                                               | 2            |
| <b>Introduction</b>       |         |                                                                                                                                                                                                   |              |
| Background/rationale      | 2       | Explain the scientific background and rationale for the investigation being reported                                                                                                              | 4-5          |
| Objectives                | 3       | State specific objectives, including any prespecified hypotheses                                                                                                                                  | 5-6          |
| <b>Methods</b>            |         |                                                                                                                                                                                                   |              |
| Study design              | 4       | Present key elements of study design early in the paper                                                                                                                                           | 6            |
| Setting                   | 5       | Describe the setting, locations, and relevant dates, including periods of recruitment, exposure, follow-up, and data collection                                                                   | 6, 11-12, 23 |
| Participants              | 6       | (a) Give the eligibility criteria, and the sources and methods of selection of participants. Describe methods of follow-up                                                                        | 6-7, 11, 23  |
|                           |         | (b) For matched studies, give matching criteria and number of exposed and unexposed                                                                                                               | N/A          |
| Variables                 | 7       | Clearly define all outcomes, exposures, predictors, potential confounders, and effect modifiers. Give diagnostic criteria, if applicable                                                          | 7-10         |
| Data sources/measurement  | 8*      | For each variable of interest, give sources of data and details of methods of assessment (measurement). Describe comparability of assessment methods if there is more than one group              | 7-10, 12-14  |
| Bias                      | 9       | Describe any efforts to address potential sources of bias                                                                                                                                         | 10-11; 12-14 |
| Study size                | 10      | Explain how the study size was arrived at                                                                                                                                                         | 11           |
| Quantitative variables    | 11      | Explain how quantitative variables were handled in the analyses. If applicable, describe which groupings were chosen and why                                                                      | 12-14        |
| Statistical methods       | 12      | (a) Describe all statistical methods, including those used to control for confounding                                                                                                             | 12-14        |
|                           |         | (b) Describe any methods used to examine subgroups and interactions                                                                                                                               | 12-14        |
|                           |         | (c) Explain how missing data were addressed                                                                                                                                                       | N/A          |
|                           |         | (d) If applicable, explain how loss to follow-up was addressed                                                                                                                                    | N/A          |
|                           |         | (e) Describe any sensitivity analyses                                                                                                                                                             | N/A          |
| <b>Results</b>            |         |                                                                                                                                                                                                   |              |
| Participants              | 13*     | (a) Report numbers of individuals at each stage of study—eg numbers potentially eligible, examined for eligibility, confirmed eligible, included in the study, completing follow-up, and analysed | N/A          |
|                           |         | (b) Give reasons for non-participation at each stage                                                                                                                                              | N/A          |
|                           |         | (c) Consider use of a flow diagram                                                                                                                                                                | N/A          |
| Descriptive data          | 14*     | (a) Give characteristics of study participants (eg demographic, clinical, social) and information on exposures and potential confounders                                                          | N/A          |
|                           |         | (b) Indicate number of participants with missing data for each variable of interest                                                                                                               | N/A          |
|                           |         | (c) Summarise follow-up time (eg, average and total amount)                                                                                                                                       | N/A          |
| Outcome data              | 15*     | Report numbers of outcome events or summary measures over time                                                                                                                                    | N/A          |



|    |                          |    |                                                                                                                                                                                                              |     |
|----|--------------------------|----|--------------------------------------------------------------------------------------------------------------------------------------------------------------------------------------------------------------|-----|
| 1  | Main results             | 16 | (a) Give unadjusted estimates and, if applicable, confounder-adjusted estimates and their precision (eg, 95% confidence interval). Make clear which confounders were adjusted for and why they were included | N/A |
| 2  |                          |    | (b) Report category boundaries when continuous variables were categorized                                                                                                                                    | N/A |
| 3  |                          |    | (c) If relevant, consider translating estimates of relative risk into absolute risk for a meaningful time period                                                                                             | N/A |
| 4  |                          |    |                                                                                                                                                                                                              |     |
| 5  | Other analyses           | 17 | Report other analyses done—eg analyses of subgroups and interactions, and sensitivity analyses                                                                                                               | N/A |
| 6  |                          |    |                                                                                                                                                                                                              |     |
| 7  |                          |    |                                                                                                                                                                                                              |     |
| 8  |                          |    |                                                                                                                                                                                                              |     |
| 9  |                          |    |                                                                                                                                                                                                              |     |
| 10 |                          |    |                                                                                                                                                                                                              |     |
| 11 | <b>Discussion</b>        |    |                                                                                                                                                                                                              |     |
| 12 | Key results              | 18 | Summarise key results with reference to study objectives                                                                                                                                                     | N/A |
| 13 | Limitations              | 19 | Discuss limitations of the study, taking into account sources of potential bias or imprecision. Discuss both direction and magnitude of any potential bias                                                   | 3   |
| 14 | Interpretation           | 20 | Give a cautious overall interpretation of results considering objectives, limitations, multiplicity of analyses, results from similar studies, and other relevant evidence                                   | N/A |
| 15 | Generalisability         | 21 | Discuss the generalisability (external validity) of the study results                                                                                                                                        | N/A |
| 16 |                          |    |                                                                                                                                                                                                              |     |
| 17 | <b>Other information</b> |    |                                                                                                                                                                                                              |     |
| 18 | Funding                  | 22 | Give the source of funding and the role of the funders for the present study and, if applicable, for the original study on which the present article is based                                                | 16  |
| 19 |                          |    |                                                                                                                                                                                                              |     |
| 20 |                          |    |                                                                                                                                                                                                              |     |
| 21 |                          |    |                                                                                                                                                                                                              |     |
| 22 |                          |    |                                                                                                                                                                                                              |     |
| 23 |                          |    |                                                                                                                                                                                                              |     |
| 24 |                          |    |                                                                                                                                                                                                              |     |
| 25 |                          |    |                                                                                                                                                                                                              |     |
| 26 |                          |    |                                                                                                                                                                                                              |     |
| 27 |                          |    |                                                                                                                                                                                                              |     |
| 28 |                          |    |                                                                                                                                                                                                              |     |
| 29 |                          |    |                                                                                                                                                                                                              |     |
| 30 |                          |    |                                                                                                                                                                                                              |     |
| 31 |                          |    |                                                                                                                                                                                                              |     |
| 32 |                          |    |                                                                                                                                                                                                              |     |
| 33 |                          |    |                                                                                                                                                                                                              |     |
| 34 |                          |    |                                                                                                                                                                                                              |     |
| 35 |                          |    |                                                                                                                                                                                                              |     |
| 36 |                          |    |                                                                                                                                                                                                              |     |
| 37 |                          |    |                                                                                                                                                                                                              |     |
| 38 |                          |    |                                                                                                                                                                                                              |     |
| 39 |                          |    |                                                                                                                                                                                                              |     |
| 40 |                          |    |                                                                                                                                                                                                              |     |
| 41 |                          |    |                                                                                                                                                                                                              |     |
| 42 |                          |    |                                                                                                                                                                                                              |     |
| 43 |                          |    |                                                                                                                                                                                                              |     |
| 44 |                          |    |                                                                                                                                                                                                              |     |
| 45 |                          |    |                                                                                                                                                                                                              |     |
| 46 |                          |    |                                                                                                                                                                                                              |     |
| 47 |                          |    |                                                                                                                                                                                                              |     |
| 48 |                          |    |                                                                                                                                                                                                              |     |
| 49 |                          |    |                                                                                                                                                                                                              |     |
| 50 |                          |    |                                                                                                                                                                                                              |     |
| 51 |                          |    |                                                                                                                                                                                                              |     |
| 52 |                          |    |                                                                                                                                                                                                              |     |
| 53 |                          |    |                                                                                                                                                                                                              |     |
| 54 |                          |    |                                                                                                                                                                                                              |     |
| 55 |                          |    |                                                                                                                                                                                                              |     |
| 56 |                          |    |                                                                                                                                                                                                              |     |
| 57 |                          |    |                                                                                                                                                                                                              |     |
| 58 |                          |    |                                                                                                                                                                                                              |     |
| 59 |                          |    |                                                                                                                                                                                                              |     |
| 60 |                          |    |                                                                                                                                                                                                              |     |

\*Give information separately for exposed and unexposed groups.

**Note:** An Explanation and Elaboration article discusses each checklist item and gives methodological background and published examples of transparent reporting. The STROBE checklist is best used in conjunction with this article (freely available on the Web sites of PLoS Medicine at <http://www.plosmedicine.org/>, Annals of Internal Medicine at <http://www.annals.org/>, and Epidemiology at <http://www.epidem.com/>). Information on the STROBE Initiative is available at <http://www.strobe-statement.org>.
