# Supplementary material for: Critical illness myopathy and trajectory of recovery in acute kidney injury requiring continuous renal replacement therapy: a prospective observational trial protocol
Source: PubMed Central journal article supplement — BMJ Open. 2023 May 22;13(5):e072448. doi: 10.1136/bmjopen-2023-072448 (PMC10230984; doi:10.1136/bmjopen-2023-072448), 2023-05-22
Supplement: bmjopen-2023-072448.reviewer_comments.pdf [file bmjopen-2023-072448.reviewer_comments.pdf]

## PEER REVIEW HISTORY

BMJ Open publishes all reviews undertaken for accepted manuscripts. Reviewers are asked to complete a checklist review form (<http://bmjopen.bmj.com/site/about/resources/checklist.pdf>) and are provided with free text boxes to elaborate on their assessment. These free text comments are reproduced below.

### ARTICLE DETAILS

|                            |                                                                                                                                                                                                           |
|----------------------------|-----------------------------------------------------------------------------------------------------------------------------------------------------------------------------------------------------------|
| <b>TITLE (PROVISIONAL)</b> | Critical Illness Myopathy and Trajectory of Recovery in Acute Kidney Injury Requiring Continuous Renal Replacement Therapy: A Prospective Observational Trial Protocol                                    |
| <b>AUTHORS</b>             | Teixeira, J. Pedro; Griffin, Benjamin R; Pal, Chaitanya; González-Seguel, Felipe; Jenkins, Nathaniel; Jones, Beth; Yoshida, Yuri; George, Naomi; Israel, Hayley; Ghazi, Lama; Neyra, Javier; Mayer, Kirby |

### VERSION 1 – REVIEW

|                        |                                              |
|------------------------|----------------------------------------------|
| <b>REVIEWER</b>        | Wan, Yize<br>Queen Mary University of London |
| <b>REVIEW RETURNED</b> | 06-Mar-2023                                  |

|                         |                                                                                     |
|-------------------------|-------------------------------------------------------------------------------------|
| <b>GENERAL COMMENTS</b> | I thank the reviewers for addressing the concerns raised. I have no other comments. |
|-------------------------|-------------------------------------------------------------------------------------|

### VERSION 1 – AUTHOR RESPONSE

Reviewer: 1 Comments to the Author: I thank the reviewers for addressing the concerns raised. I have no other comments. Thank you for your prior helpful comments.
