# Supplementary material for: Critical illness myopathy and trajectory of recovery in acute kidney injury requiring continuous renal replacement therapy: a prospective observational trial protocol
Source: PubMed Central journal article supplement — BMJ Open. 2023 May 22;13(5):e072448. doi: 10.1136/bmjopen-2023-072448 (PMC10230984; doi:10.1136/bmjopen-2023-072448), 2023-05-22
Supplement: bmjopen-2023-072448supp001.pdf [file bmjopen-2023-072448supp001.pdf]

End-of-study feedback survey for research study, "The Impact of Renal Replacement Therapy on the Development of Critical Illness Muscle Wasting"

Patient subject no.: \_\_\_\_\_

Thank you for participating in our study about the effects of acute kidney injury in the intensive care unit on muscle loss and muscle weakness. We ask that you to please fill out this brief survey to help us determine what kind of research would be best in the future.

1. Of all the tests we completed, including the different surveys you took and the different types of functional tests we performed, which one do you think was the most important or valuable to you as a survivor of acute kidney injury? Multiple answers are okay.
  
2. Is there anything else about muscle strength and physical function that you think we should test or measure in future research in patients like yourself?
